# Supplementary material
Source: MDPI journal article supplement (https://www.mdpi.com/1999-4907/14/6/1182)
Supplement: s1 [file s1 › Supplementary Tables.xlsx]

## Sheet: Table S1
Supplemental Table 1. Summary of the RNA-seq data of 16 Salix species
Number	SRA Study	Consent	Species	Section	organism	Platform	Data source
1	SRR23215048	public	Salix integra	Sect. Caesiae	Leaf	ILLUMINA	Sequenced
2	SRR23215047	public	Salix matsudana var.tortuosa	Sect. Salix	Leaf	ILLUMINA	Sequenced
3	SRR23215046	public	Salix babylonica	Sect. Salix	Leaf	ILLUMINA	Sequenced
4	SRR23215045	public	Salix myrtilloides	Sect. Myrtilloides	Leaf	ILLUMINA	Sequenced
5	SRR23215044	public	Salix nankingensis	Sect. Wilsonianae	Leaf	ILLUMINA	Sequenced
6	SRR23215043	public	Salix psammophila	Sect. Helix	Leaf	ILLUMINA	Sequenced
7	SRR23215042	public	Salix viminalis	Sect. Vimen	Leaf	ILLUMINA	Sequenced
8	SRR9131241	public	Salix wallichiana	Sect. Vetrix	Leaf	ILLUMINA	download
9	SRR9131243	public	Salix tetrasperma	Sect. Tetraspermae	Leaf	ILLUMINA	download
10	SRR9131244	public	Salix souliei	Sect. Lindleyanae	Leaf	ILLUMINA	download
11	SRR7341541	public	Salix brachista	Sect. Lindleyanae	Leaf	ILLUMINA	download
12	SRR17579126	public	Salix suchowensis	Sect. Helix	Leaf	ILLUMINA	download
13	SRR17579127
14	SRR12893426	public	Salix dunnii	Sect. Wilsonianae	Leaf	ILLUMINA	download
15	ERR980747	public	Salix purpurea	Sect. Helix	Leaf	ILLUMINA	download
16	ERR980749
17	SRR18795262	public	Salix. udensis	Sect. Vimen	Leaf	BGISEQ	download
18	SRR18795267
19	SRR18795258	public	Salix koriyanagi	Sect. Helix	Leaf	BGISEQ	download
20	SRR18795322

## Sheet: Table S2
Supplemental Table 2. Quality control the of 16 Salix species RNA-seq data.
Species	Section	GC (%)	Total Reads	Total bases (bp)	Trimed GC (%)	Trimed Total Reads	Trimed Total bases (bp)
Salix integra	Sect. Caesiae	45	92277848	13841677200	45	90289300	13543395000
Salix matsudana var.tortuosa	Sect. Salix	45	79911346	11986701900	45	78431900	11764785000
Salix babylonica	Sect. Salix	44	81739180	12260877000	44	80092914	12013937100
Salix myrtilloides	Sect. Myrtilloides	45	78432710	11764906500	45	77083220	11562483000
Salix nankingensis	Sect. Wilsonianae	44	78419900	11762985000	44	76977414	11546612100
Salix psammophila	Sect. Helix	45	81281998	12192299700	45	79908594	11986289100
Salix viminalis	Sect. Vimen	45	80691752	12103762800	45	79311062	11896659300
Salix wallichiana	Sect. Vetrix	44	54754584	8213187600	44	53957578	8093636700
Salix tetrasperma	Sect. Tetraspermae	45	54422632	8163394800	45	53257842	7988676300
Salix souliei	Sect. Lindleyanae	45	53885146	8082771900	45	52893684	7934052600
Salix brachista	Sect. Lindleyanae	44	133417464	20012619600	44	122921910	18438286500
Salix suchowensis	Sect. Helix	44	102242378	15336356700	45	96017502	14402625300
Salix dunnii	Sect. Wilsonianae	45	96386408	14457961200	45	89665696	13449854400
Salix purpurea	Sect. Helix	44	164972830	24745924500	44	157916440	23687466000
Salix udensis	Sect. Vimen	45	89637886	13445682900	45	88904158	13335623700
Salix koriyanagi	Sect. Helix	45	88984848	13347727200	46	88098190	13214728500
Total	\	NA	1411458910	211718836500	NA	1365727404	204859110600
Average	\	44.625	8.82162e+07	1.32324e+10	44.75	8.5358e+07	1.28037e+10

## Sheet: Table S3
Supplemental Table 3. Transcriptome assembly of 16 Salix species.
Preliminary assembly transcript
Species	Section	GC%	Transcripts Number	Min length (bp)	Max length (bp)	Transcripts_N50(bp)	Transcripts Average length (bp)	Transcripts Total bases (bp)
Salix integra	Sect. Caesiae	41.82	84130	183	15618	1966	1269.27	106783376
Salix matsudana var.tortuosa	Sect. Salix	41.22	209698	192	14434	1585	1007.59	211289855
Salix babylonica	Sect. Salix	41.21	230383	184	16680	1516	955.3	220084081
Salix myrtilloides	Sect. Myrtilloides	41.78	71443	181	24039	1976	1298.62	92777521
Salix nankingensis	Sect. Wilsonianae	40.87	90186	190	18717	2113	1370.38	123588749
Salix psammophila	Sect. Helix	41.08	130743	193	15614	1948	1234.93	161458435
Salix viminalis	Sect. Vimen	42.02	68647	185	16144	1958	1294.08	88834709
Salix wallichiana	Sect. Vetrix	41.88	114349	181	22942	1608	992.01	113435189
Salix tetrasperma	Sect. Tetraspermae	42.24	135101	188	16264	1543	965.45	130433846
Salix souliei	Sect. Lindleyanae	42.67	79789	180	24205	1687	1015.19	81000910
Salix brachista	Sect. Lindleyanae	40.7	159586	181	15538	2153	1256.3	200487199
Salix suchowensis	Sect. Helix	40.92	102175	187	23367	2146	1373.84	140372099
Salix dunnii	Sect. Wilsonianae	40.66	119862	180	16993	2293	1455.01	174400662
Salix purpurea	Sect. Helix	39.87	136602	189	17179	2260	1371.94	187409681
Salix udensis	Sect. Vimen	41.05	108273	185	22781	2025	1246.89	135004519
Salix koriyanagi	Sect. Helix	41.11	111545	181	16905	1999	1225.3	136675826
Total	\	\	1952512	2960	297420	30776	19332.1	2304036657
Average	\	41.3188	122032	185	18588.8	1923.5	1208.26	1.44002e+08
Representative assembly transcript
Species	Section	GC%	Transcripts Number	Min length (bp)	Max length (bp)	Transcripts_N50(bp)	Transcripts Average length (bp)	Transcripts Total bases (bp)
Salix integra	Sect. Caesiae	42.38	22693	297	15618	2131	1703.85	38665408
Salix matsudana var.tortuosa	Sect. Salix	41.96	29192	297	14434	2003	1427.57	41673650
Salix babylonica	Sect. Salix	42.02	30278	297	16680	1966	1384.96	41933688
Salix myrtilloides	Sect. Myrtilloides	42.35	23055	297	24039	2102	1709.23	39406201
Salix nankingensis	Sect. Wilsonianae	41.55	21839	297	18717	2333	1846.81	40332554
Salix psammophila	Sect. Helix	41.92	24351	297	15614	2208	1672.92	40737203
Salix viminalis	Sect. Vimen	42.5	22829	297	16144	2054	1670.91	38145278
Salix wallichiana	Sect. Vetrix	42.6	23622	297	22942	1799	1335.71	31552157
Salix tetrasperma	Sect. Tetraspermae	42.58	26654	297	16264	1751	1289.34	34366064
Salix souliei	Sect. Lindleyanae	43	23807	297	24205	1806	1340.94	31923835
Salix brachista	Sect. Lindleyanae	41.39	29540	297	15538	2421	1642.64	48523659
Salix suchowensis	Sect. Helix	41.76	22317	297	23367	2357	1803.98	40259406
Salix dunnii	Sect. Wilsonianae	41.16	22000	297	16993	2576	1933.59	42538906
Salix purpurea	Sect. Helix	39.68	33295	297	17179	2499	1815.75	60455260
Salix udensis	Sect. Vimen	41.9	23004	297	22781	2242	1724.13	39661865
Salix koriyanagi	Sect. Helix	41.89	23808	297	16905	2223	1673.22	39836066
Total	\	\	402284	4752	297420	34471	25975.6	650011200
Average	\	41.915	25142.8	297	18588.8	2154.44	1623.47	40625700

## Sheet: Table S4
Supplemental Table 4. Completeness evaluation of the 16 Salix species' transcriptomes.
Completeness evaluation of PATs
Species	Section	Complete(C=S+D)		single-copy(S)		duplicated(D)		Fragmented(F)		Missing(M)
Salix integra	Sect. Caesiae	1355	0.985	715	0.52	640	0.465	12	0.009	8	0.006
Salix matsudana var.tortuosa	Sect. Salix	1327	0.965	155	0.113	1172	0.852	37	0.027	11	0.008
Salix babylonica	Sect. Salix	1330	0.967	140	0.102	1190	0.865	37	0.027	8	0.006
Salix myrtilloides	Sect. Myrtilloides	1357	0.987	808	0.588	549	0.399	9	0.007	9	0.006
Salix nankingensis	Sect. Wilsonianae	1362	0.99	667	0.485	695	0.505	7	0.005	6	0.005
Salix psammophila	Sect. Helix	1341	0.975	481	0.35	860	0.625	22	0.016	12	0.009
Salix viminalis	Sect. Vimen	1361	0.99	799	0.581	562	0.409	5	0.004	9	0.006
Salix wallichiana	Sect. Vetrix	1179	0.857	491	0.357	688	0.5	114	0.083	82	0.06
Salix tetrasperma	Sect. Tetraspermae	1153	0.838	336	0.244	817	0.594	151	0.11	71	0.052
Salix souliei	Sect. Lindleyanae	1135	0.825	704	0.512	431	0.313	142	0.103	98	0.072
Salix brachista	Sect. Lindleyanae	1337	0.972	498	0.362	839	0.61	27	0.02	11	0.008
Salix suchowensis	Sect. Helix	1316	0.957	643	0.468	673	0.489	34	0.025	25	0.018
Salix dunnii	Sect. Wilsonianae	1344	0.978	510	0.371	834	0.607	20	0.015	11	0.007
Salix purpurea	Sect. Helix	1312	0.955	533	0.388	779	0.567	25	0.018	38	0.027
Salix udensis	Sect. Vimen	1347	0.98	639	0.465	708	0.515	18	0.013	10	0.007
Salix koriyanagi	Sect. Helix	1341	0.975	649	0.472	692	0.503	22	0.016	12	0.009
Average	\	1306.06	0.94975	548	0.398625	758.062	0.551125	42.625	0.031125	26.3125	0.019125
Completeness evaluation of RATs
Species	Section	Complete(C=S+D)		single-copy(S)		duplicated(D)		Fragmented(F)		Missing(M)
Salix integra	Sect. Caesiae	1245	0.906	1204	0.876	41	0.03	83	0.06	47	0.034
Salix matsudana var.tortuosa	Sect. Salix	1127	0.82	1101	0.801	26	0.019	174	0.127	74	0.053
Salix babylonica	Sect. Salix	1156	0.841	1133	0.824	23	0.017	157	0.114	62	0.045
Salix myrtilloides	Sect. Myrtilloides	1300	0.946	1237	0.9	63	0.046	44	0.032	31	0.022
Salix nankingensis	Sect. Wilsonianae	1153	0.838	1103	0.802	50	0.036	145	0.105	77	0.057
Salix psammophila	Sect. Helix	1098	0.798	1058	0.769	40	0.029	183	0.133	94	0.069
Salix viminalis	Sect. Vimen	1307	0.95	1239	0.901	68	0.049	39	0.028	29	0.022
Salix wallichiana	Sect. Vetrix	1067	0.776	1045	0.76	22	0.016	170	0.124	138	0.1
Salix tetrasperma	Sect. Tetraspermae	1120	0.815	1060	0.771	60	0.044	156	0.113	99	0.072
Salix souliei	Sect. Lindleyanae	1100	0.8	1037	0.754	63	0.046	158	0.115	117	0.085
Salix brachista	Sect. Lindleyanae	1025	0.746	958	0.697	67	0.049	228	0.166	122	0.088
Salix suchowensis	Sect. Helix	1047	0.762	1005	0.731	42	0.031	221	0.161	107	0.077
Salix dunnii	Sect. Wilsonianae	1026	0.746	992	0.721	34	0.025	227	0.165	122	0.089
Salix purpurea	Sect. Helix	1069	0.778	988	0.719	81	0.059	188	0.137	118	0.085
Salix udensis	Sect. Vimen	1140	0.829	1115	0.811	25	0.018	144	0.105	91	0.066
Salix koriyanagi	Sect. Helix	1131	0.822	1106	0.804	25	0.018	159	0.116	85	0.062
Average	\	1131.94	0.823313	1086.31	0.790062	45.625	0.03325	154.75	0.112563	88.3125	0.064125

## Sheet: Table S5
Supplemental Table 5. Transcriptome annotation of 16 Salix species.
Species	Section	Transcripts_Number	NR	NR Ratio	EggNOG5	EggNOG5 Ratio	SwissProt	SwissProt Ratio	TAIR10	TAIR10 Ratio	Pfam	Pfam Ratio	GO	GO Ratio	Kegg	Kegg Ratio
Salix integra	Sect. Caesiae	22693	21982	0.968669	21645	0.953818	16884	0.744018	20010	0.88177	17292	0.761997	13722	0.60468	9409	0.414621
Salix matsudana var.tortuosa	Sect. Salix	29192	27661	0.947554	27161	0.930426	20129	0.689538	24026	0.823034	18981	0.650212	17389	0.595677	11610	0.397712
Salix babylonica	Sect. Salix	30278	28515	0.941773	27964	0.923575	20528	0.677984	24461	0.80788	19297	0.637327	17963	0.593269	11906	0.393223
Salix myrtilloides	Sect. Myrtilloides	23055	22445	0.973542	22130	0.959879	17406	0.754977	20521	0.890089	17844	0.773975	13992	0.606897	9613	0.416959
Salix nankingensis	Sect. Wilsonianae	21839	21091	0.965749	20809	0.952837	16237	0.743486	19304	0.883923	16379	0.749989	13049	0.597509	9081	0.415816
Salix psammophila	Sect. Helix	24351	23280	0.956018	22891	0.940044	17358	0.712825	20589	0.845509	17325	0.71147	14600	0.599565	9795	0.402242
Salix viminalis	Sect. Vimen	22829	22217	0.973192	21949	0.961453	17245	0.755399	20416	0.894301	17685	0.774673	13925	0.60997	9539	0.417846
Salix wallichiana	Sect. Vetrix	23622	22836	0.966726	22472	0.951317	17015	0.720303	20086	0.850309	16505	0.698713	14375	0.608543	9767	0.41347
Salix tetrasperma	Sect. Tetraspermae	26654	25583	0.959818	25177	0.944586	18838	0.706761	22225	0.833834	18031	0.676484	16015	0.600848	10789	0.40478
Salix souliei	Sect. Lindleyanae	23807	23000	0.966102	22543	0.946906	17083	0.717562	20019	0.840887	16823	0.706641	14194	0.596211	9782	0.410888
Salix brachista	Sect. Lindleyanae	29540	27987	0.947427	27138	0.918687	20837	0.705383	22622	0.765809	20474	0.693094	16641	0.563338	11581	0.392045
Salix suchowensis	Sect. Helix	22317	21444	0.960882	21095	0.945244	16213	0.726487	19240	0.862123	16128	0.722678	13444	0.602411	9106	0.40803
Salix dunnii	Sect. Wilsonianae	22000	21022	0.955545	20641	0.938227	15867	0.721227	18746	0.852091	15767	0.716682	13081	0.594591	8927	0.405773
Salix purpurea	Sect. Helix	33295	31494	0.945908	29657	0.890734	22796	0.684667	21204	0.636852	23716	0.712299	15854	0.476168	12043	0.361706
Salix udensis	Sect. Vimen	23004	22174	0.963919	21822	0.948618	16765	0.728786	19810	0.861155	16886	0.734046	13943	0.606112	9309	0.404669
Salix koriyanagi	Sect. Helix	23808	22856	0.960013	22370	0.9396	17118	0.719002	19972	0.838878	17191	0.722068	14070	0.590978	9509	0.399404
Total	\	402284	385587	0.958494	377464	0.938302	288319	0.716705	333251	0.828397	286324	0.711746	236257	0.587289	161766	0.402119
Average	\	25142.8	24099.2	0.958494	23591.5	0.938302	18019.9	0.716705	20828.2	0.828397	17895.2	0.711746	14766.1	0.587289	10110.4	0.402119

## Sheet: Table S6
Supplemental Table 6. Presumptive SSRs among 16 Salix species transcriptomes using MISA
Species	Section	Di-nucleotide	Tri-nucleotide	Tetra-nucleotide	Penta-nucleotide	Hexa-nucleotide
Salix integra	Sect. Caesiae	2952	2621	151	40	55
Salix matsudana var.tortuosa	Sect. Salix	2573	2248	87	31	56
Salix babylonica	Sect. Salix	2618	2325	110	23	45
Salix myrtilloides	Sect. Myrtilloides	3036	2632	131	36	51
Salix nankingensis	Sect. Wilsonianae	2838	2202	127	34	40
Salix psammophila	Sect. Helix	2982	2529	135	51	41
Salix viminalis	Sect. Vimen	3034	2724	161	41	58
Salix wallichiana	Sect. Vetrix	1944	2011	90	24	41
Salix tetrasperma	Sect. Tetraspermae	1824	1971	69	24	35
Salix souliei	Sect. Lindleyanae	1837	1986	76	27	32
Salix brachista	Sect. Lindleyanae	3383	2726	127	45	36
Salix suchowensis	Sect. Helix	3030	2497	169	45	40
Salix dunnii	Sect. Wilsonianae	2905	2157	126	29	17
Salix purpurea	Sect. Helix	2942	3491	149	40	41
Salix udensis	Sect. Vimen	3087	2618	151	42	54
Salix koriyanagi	Sect. Helix	3089	2515	150	27	44
Total	\	44074	39253	2009	559	686
Average	\	2754.62	2453.31	125.562	34.9375	42.875

## Sheet: Table S7
Supplemental Table 7. TFs among the 16 Salix plants transcriptomes by using iTAK.
Species	Section	AP2/ERF-AP2	AP2/ERF-ERF	AP2/ERF-RAV	Alfin-like	B3	B3-ARF	BBR-BPC	BES1	BSD	C2C2-CO-like	C2C2-Dof	C2C2-GATA	C2C2-LSD	C2C2-YABBY	C2H2	C3H	CAMTA	CPP	CSD	DBB	DBP	E2F-DP	EIL	FAR1	GARP-ARR-B	GARP-G2-like	GRAS	GRF	GeBP	HB-BELL	HB-HD-ZIP	HB-KNOX	HB-PHD	HB-WOX	HB-other	HRT	HSF	LFY	LIM	LOB	MADS-M-type	MADS-MIKC	MYB	MYB-related	NAC	NF-X1	NF-YA	NF-YB
Salix integra	Sect. Caesiae	7	100	2	5	34	24	6	6	1	11	28	29	5	9	93	53	4	5	4	6	2	6	4	41	8	37	51	13	5	12	31	12	2	7	14	1	19	1	6	25	15	19	95	64	76	3	8	8
Salix matsudana var.tortuosa	Sect. Salix	5	95	2	3	38	17	13	8	1	8	30	28	4	7	89	65	3	7	4	4	5	6	7	35	5	36	60	11	5	10	28	9	2	6	23	1	20	1	4	21	12	20	78	57	77	4	9	8
Salix babylonica	Sect. Salix	9	98	1	4	33	16	13	10	1	6	30	26	4	8	86	63	3	8	8	8	4	6	6	37	7	37	57	10	9	11	25	4	2	7	25	1	17	1	4	20	11	16	76	63	73	4	7	12
Salix myrtilloides	Sect. Myrtilloides	7	104	1	7	38	23	8	6	1	9	32	30	5	7	94	58	4	9	5	6	3	6	4	38	8	36	47	14	6	15	37	4	3	7	15	1	17	1	7	21	14	16	104	59	84	3	7	13
Salix nankingensis	Sect. Wilsonianae	4	94	2	5	25	19	6	10	1	9	34	26	4	7	81	47	3	6	5	4	6	5	4	34	7	37	58	7	9	10	30	4	1	4	14	1	19	1	8	18	6	17	78	52	73	2	8	11
Salix psammophila	Sect. Helix	4	98	2	6	34	16	5	7	1	5	27	26	2	4	93	52	2	8	4	8	2	6	6	35	8	35	54	12	6	9	29	9	2	5	16	1	21	1	2	23	16	16	70	61	70	4	7	7
Salix viminalis	Sect. Vimen	10	100	2	8	39	22	6	10	1	9	34	29	5	10	100	58	5	7	4	7	4	8	5	37	10	45	45	8	6	15	34	4	2	6	14	1	19	2	6	26	10	21	88	54	77	2	6	9
Salix wallichiana	Sect. Vetrix	5	65	1	4	24	15	7	7	1	7	22	20	1	5	66	45	1	6	3	5	4	5	6	39	5	32	47	4	7	9	19	0	2	5	15	1	20	0	5	13	4	13	53	58	59	3	5	9
Salix tetrasperma	Sect. Tetraspermae	5	75	1	6	31	13	7	8	1	7	28	25	3	8	83	54	4	5	3	4	2	4	7	36	4	29	49	10	6	9	25	8	1	5	16	2	16	1	5	13	2	12	61	56	63	3	10	10
Salix souliei	Sect. Lindleyanae	3	68	2	5	23	15	7	8	1	9	28	25	4	7	74	51	4	6	4	4	2	5	4	35	6	29	41	5	5	11	18	6	0	5	20	1	20	1	4	13	2	16	57	59	54	2	6	11
Salix brachista	Sect. Lindleyanae	2	104	3	3	38	11	10	8	1	3	26	22	4	9	107	54	3	7	8	12	2	9	5	30	5	31	53	10	5	9	28	6	0	9	24	1	15	1	7	26	10	19	72	79	70	3	7	10
Salix suchowensis	Sect. Helix	3	106	3	4	33	18	6	9	1	7	33	24	2	5	84	49	2	5	3	4	2	7	3	36	6	28	42	7	6	8	32	3	1	5	10	1	20	2	3	19	12	16	71	45	72	3	4	11
Salix dunnii	Sect. Wilsonianae	3	101	1	3	35	15	8	9	1	3	27	24	2	5	88	52	4	5	4	4	2	8	7	37	5	25	53	8	6	9	25	1	1	3	18	1	14	2	6	17	11	17	63	51	67	3	7	7
Salix purpurea	Sect. Helix	3	80	1	5	25	15	7	9	2	2	29	27	4	5	184	63	2	7	8	7	3	7	5	36	6	33	43	4	3	8	28	2	1	3	72	1	19	0	17	12	7	15	50	52	53	2	7	10
Salix udensis	Sect. Vimen	9	94	3	6	35	18	7	5	1	4	29	24	2	6	91	52	2	6	4	6	3	5	5	37	6	35	51	10	7	10	29	6	2	5	14	1	16	1	6	21	9	20	68	59	74	4	6	10
Salix koriyanagi	Sect. Helix	6	96	2	6	34	19	6	6	0	6	33	26	5	6	89	48	2	7	4	7	3	5	4	37	4	40	52	8	7	12	31	8	1	7	16	1	18	1	5	22	9	18	77	59	76	3	7	7
Total	\	85	1478	29	80	519	276	122	126	16	105	470	411	56	108	1502	864	48	104	75	96	49	98	82	580	100	545	803	141	98	167	449	86	23	89	326	17	290	17	95	310	150	271	1161	928	1118	48	111	153
Average	\	5.3125	92.375	1.8125	5	32.4375	17.25	7.625	7.875	1	6.5625	29.375	25.6875	3.5	6.75	93.875	54	3	6.5	4.6875	6	3.0625	6.125	5.125	36.25	6.25	34.0625	50.1875	8.8125	6.125	10.4375	28.0625	5.375	1.4375	5.5625	20.375	1.0625	18.125	1.0625	5.9375	19.375	9.375	16.9375	72.5625	58	69.875	3	6.9375	9.5625
[truncated: 20 more columns]

## Sheet: Table S8
Supplemental Table 8. Summary of the gene families of 16 Salix species identified.
Number of core, shell and cloud gene families in willow pan-transcription.
All Orthogroup	Core Orthogroup	Shell Orthogroup	Cloud Orthogroup	Not clustered
29688	9015	19533	1120	16467
The proportion of core, shell and cloud gene families in each Salix Species
Species	Section	Number of orthogroups containing species	Percentage of orthogroups containing species	Number of species-core orthogroups	Percentage of species-core orthogroups	Number of species-shell orthogroups	Percentage of species-shell orthogroups	Number of species-Cloud orthogroups	Percentage of species-Cloud orthogroups
Salix integra	Sect. Caesiae	16760	0.564538	9015	0.537888	7739	0.461754	6	0.000357995
Salix matsudana var.tortuosa	Sect. Salix	19616	0.660738	9015	0.459574	10574	0.53905	27	0.00137643
Salix babylonica	Sect. Salix	19753	0.665353	9015	0.456386	10701	0.54174	37	0.00187313
Salix myrtilloides	Sect. Myrtilloides	16628	0.560092	9015	0.542158	7609	0.457602	4	0.000240558
Salix nankingensis	Sect. Wilsonianae	16232	0.546753	9015	0.555384	7217	0.444616	0	0
Salix psammophila	Sect. Helix	17472	0.588521	9015	0.515968	8455	0.483917	2	0.000114469
Salix viminalis	Sect. Vimen	16643	0.560597	9015	0.541669	7628	0.458331	0	0
Salix wallichiana	Sect. Vetrix	16713	0.562955	9015	0.5394	7682	0.459642	16	0.000957339
Salix tetrasperma	Sect. Tetraspermae	18044	0.607788	9015	0.499612	8993	0.498393	36	0.00199512
Salix souliei	Sect. Lindleyanae	16432	0.55349	9015	0.548625	7304	0.444499	113	0.00687683
Salix brachista	Sect. Lindleyanae	19254	0.648545	9015	0.468214	10136	0.526436	103	0.00534954
Salix suchowensis	Sect. Helix	16436	0.553624	9015	0.548491	7419	0.451387	2	0.000121684
Salix dunnii	Sect. Wilsonianae	16331	0.550088	9015	0.552018	7302	0.447125	14	0.000857265
Salix purpurea	Sect. Helix	18169	0.611998	9015	0.496175	8398	0.462216	756	0.0416093
Salix udensis	Sect. Vimen	16900	0.569254	9015	0.533432	7882	0.466391	3	0.000177515
Salix koriyanagi	Sect. Helix	17607	0.593068	9015	0.512012	8591	0.487931	1	5.67956e-05
Average	\	17436.9	0.587337	9015	0.517008	8351.88	0.478978	70	0.00401448

## Sheet: Table S9
Supplemental Table 9. The proportion of core, disposable, and specific transcripts/genes in each Salix species.
Species	Section	Number of transcripts	Number of transcripts in orthogroups	Percentage of transcripts in orthogroups	Number of transcripts with Not clustered	Percentage of transcripts with Not clustered	Number of core transcripts	Percentage of core transcripts	Number of shell transcripts	Percentage of shell transcripts	Number of specific transcripts	Percentage of specific transcripts
Salix integra	Sect. Caesiae	22693	22286	0.982065	407	0.017935	12862	0.566783	9411	0.414709	420	0.0185079
Salix matsudana var.tortuosa	Sect. Salix	29192	27976	0.958345	1216	0.0416552	14274	0.48897	13647	0.467491	1271	0.0435393
Salix babylonica	Sect. Salix	30278	28828	0.95211	1450	0.0478896	14705	0.485666	14046	0.463901	1527	0.0504327
Salix myrtilloides	Sect. Myrtilloides	23055	22625	0.981349	430	0.0186511	13273	0.57571	9344	0.405292	438	0.018998
Salix nankingensis	Sect. Wilsonianae	21839	21302	0.975411	537	0.024589	12690	0.581071	8612	0.39434	537	0.024589
Salix psammophila	Sect. Helix	24351	23712	0.973759	639	0.0262412	13238	0.543633	10470	0.429962	643	0.0264055
Salix viminalis	Sect. Vimen	22829	22438	0.982873	391	0.0171273	13067	0.572386	9371	0.410487	391	0.0171273
Salix wallichiana	Sect. Vetrix	23622	22947	0.971425	675	0.0285751	13341	0.56477	9571	0.405173	710	0.03
Salix tetrasperma	Sect. Tetraspermae	26654	25604	0.960606	1050	0.0393937	13986	0.524724	11540	0.432956	1128	0.0423201
Salix souliei	Sect. Lindleyanae	23807	22795	0.957491	1012	0.0425085	13361	0.561221	9088	0.381736	1358	0.057042
Salix brachista	Sect. Lindleyanae	29540	27395	0.927387	2145	0.0726134	13825	0.468009	13321	0.450948	2394	0.0810427
Salix suchowensis	Sect. Helix	22317	21760	0.975041	557	0.0249586	12795	0.57333	8961	0.401532	561	0.0251378
Salix dunnii	Sect. Wilsonianae	22000	21139	0.960864	861	0.0391364	12384	0.562909	8720	0.396364	896	0.0407273
Salix purpurea	Sect. Helix	33295	29302	0.880072	3993	0.119928	13514	0.405887	12874	0.386665	6907	0.207449
Salix udensis	Sect. Vimen	23004	22475	0.977004	529	0.022996	12749	0.554208	9720	0.422535	535	0.0232568
Salix koriyanagi	Sect. Helix	23808	23233	0.975848	575	0.0241515	12686	0.532846	10545	0.442918	577	0.0242356
Total	\	402284	385817	\	16467	\	212750	\	169241	\	20293	\
Average	\	25142.8	24113.6	0.961978	1029.19	0.0380218	13296.9	0.535133	10577.6	0.419188	1268.31	0.0456792

## Sheet: Table S10
Supplemental Table 10. Classification of gene families into high-, medium-, and low- variability categories.
Orthogroup	S. tetrasperma (10)	S. souliei (11)	S. brachista (12)	S. integra (1)	S. matsudana var. tortuosa (2)	S. suchowensis (30)	S. dunnii (31)	S. purpurea (32)	S. udensis (34)	S. koriyanagi (35)	S. babylonica (3)	S. myrtilloides (4)	S. nankingensis (5)	S. psammophila (6)	S. viminalis (7)	S. wallichiana (8)	Mean	SD	CV	SUM	Grade	Bin 15th percentile	Bin 85th percentile	Class
OG0000000	17	18	17	8	15	19	5	15	18	22	20	7	2	13	4	28	14.25	7.22496	0.507015	228	≥112	0.317348	0.615529	Medium variability
OG0000001	12	11	10	8	20	10	4	13	12	19	25	9	3	25	8	21	13.125	6.86901	0.523353	210	≥112	0.317348	0.615529	Medium variability
OG0000002	13	9	22	6	14	11	13	11	16	10	28	10	5	19	5	14	12.875	6.17387	0.479524	206	≥112	0.317348	0.615529	Medium variability
OG0000003	16	9	12	10	11	7	7	9	16	12	22	10	4	7	3	15	10.625	4.88365	0.459637	170	≥112	0.317348	0.615529	Medium variability
OG0000004	3	2	17	13	13	15	6	6	13	17	17	8	5	20	5	3	10.1875	6.03566	0.592457	163	≥112	0.317348	0.615529	Medium variability
OG0000005	8	10	18	12	8	13	10	5	15	7	14	4	6	10	5	13	9.875	4.04763	0.409887	158	≥112	0.317348	0.615529	Medium variability
OG0000006	25	7	20	2	11	6	7	8	7	10	16	6	8	12	2	7	9.625	6.15224	0.639193	154	≥112	0.317348	0.615529	High variability
OG0000007	10	10	14	4	16	10	4	6	19	9	15	3	2	9	5	15	9.4375	5.20216	0.551223	151	≥112	0.317348	0.615529	Medium variability
OG0000008	15	6	17	4	7	6	3	4	13	10	17	5	3	11	5	22	9.25	5.93857	0.642008	148	≥112	0.317348	0.615529	High variability
OG0000009	6	5	8	9	13	12	11	6	13	7	11	5	9	13	10	9	9.1875	2.83358	0.308417	147	≥112	0.317348	0.615529	Low variability
OG0000010	1	2	13	20	11	12	5	9	11	14	13	9	4	9	11	3	9.1875	5.08879	0.553882	147	≥112	0.317348	0.615529	Medium variability
OG0000011	5	6	29	3	9	12	5	12	8	9	13	5	3	8	3	16	9.125	6.58154	0.721265	146	≥112	0.317348	0.615529	High variability
OG0000012	20	8	15	4	5	6	7	10	8	7	17	6	5	14	4	9	9.0625	4.8781	0.538273	145	≥112	0.317348	0.615529	Medium variability
OG0000013	15	9	10	9	14	7	2	7	10	7	11	8	4	12	3	15	8.9375	3.95759	0.442807	143	≥112	0.317348	0.615529	Medium variability
OG0000014	6	11	13	6	14	5	10	6	10	16	14	10	7	5	5	4	8.875	3.87943	0.437119	142	≥112	0.317348	0.615529	Medium variability
OG0000015	13	8	16	10	9	7	8	7	8	9	8	11	2	9	9	8	8.875	2.96367	0.333935	142	≥112	0.317348	0.615529	Medium variability
OG0000016	10	7	20	4	18	7	4	6	10	8	18	4	2	10	4	10	8.875	5.5	0.619718	142	≥112	0.317348	0.615529	High variability
OG0000017	3	4	13	6	9	9	5	4	11	9	22	4	4	11	7	20	8.8125	5.64764	0.640867	141	≥112	0.317348	0.615529	High variability
OG0000018	13	5	13	7	11	8	8	7	8	3	16	6	6	10	4	12	8.5625	3.63261	0.424246	137	≥112	0.317348	0.615529	Medium variability
OG0000019	8	6	7	10	11	7	9	6	13	8	6	7	8	10	6	9	8.1875	2.04022	0.249187	131	≥112	0.317348	0.615529	Low variability
OG0000020	15	13	9	1	10	9	2	8	4	11	12	3	2	13	3	15	8.125	4.93795	0.607747	130	≥112	0.317348	0.615529	Medium variability
OG0000021	2	5	12	7	13	6	7	3	6	10	17	15	3	13	6	5	8.125	4.60254	0.566466	130	≥112	0.317348	0.615529	Medium variability
OG0000022	17	8	7	2	8	9	2	8	10	5	14	4	2	8	7	17	8	4.74693	0.593366	128	≥112	0.317348	0.615529	Medium variability
OG0000023	5	9	12	4	10	9	6	6	8	11	10	8	6	6	6	11	7.9375	2.43499	0.30677	127	≥112	0.317348	0.615529	Low variability
OG0000024	11	11	17	4	10	12	7	3	8	4	8	9	3	6	3	8	7.75	3.92428	0.506359	124	≥112	0.317348	0.615529	Medium variability
OG0000025	8	9	16	1	9	7	7	7	7	6	10	3	4	13	3	13	7.6875	4.01196	0.521881	123	≥112	0.317348	0.615529	Medium variability
OG0000026	5	9	9	8	6	5	5	8	8	4	6	10	10	8	9	6	7.25	1.94936	0.268877	116	≥112	0.317348	0.615529	Low variability
OG0000027	7	6	11	8	6	5	7	11	12	7	6	4	3	10	6	7	7.25	2.56905	0.354351	116	≥112	0.317348	0.615529	Medium variability
OG0000028	9	7	10	6	8	5	9	8	7	6	7	8	7	6	6	6	7.1875	1.37689	0.191568	115	≥112	0.317348	0.615529	Low variability
OG0000029	3	5	9	8	6	7	4	3	17	7	9	6	4	15	6	6	7.1875	3.9195	0.545322	115	≥112	0.317348	0.615529	Medium variability
OG0000030	2	3	11	9	10	10	3	5	6	14	7	5	2	10	11	3	6.9375	3.82045	0.550695	111	108.0_112.0	0.549564	0.586029	Medium variability
OG0000031	3	6	7	4	7	6	6	5	8	7	14	2	4	15	4	12	6.875	3.77492	0.549079	110	108.0_112.0	0.549564	0.586029	Low variability
OG0000032	2	2	12	10	7	10	1	6	11	5	9	6	5	15	4	3	6.75	4.05791	0.601172	108	108.0_112.0	0.549564	0.586029	High variability
OG0000033	5	7	9	5	7	6	4	8	6	6	10	7	7	7	5	8	6.6875	1.57982	0.236235	107	104.0_108.0	0.228769	0.640044	Medium variability
OG0000034	6	7	20	5	6	7	10	8	6	4	3	7	3	5	3	6	6.625	4.04763	0.610963	106	104.0_108.0	0.228769	0.640044	Medium variability
OG0000035	6	5	11	2	10	5	5	7	5	10	12	8	5	6	5	4	6.625	2.80179	0.422911	106	104.0_108.0	0.228769	0.640044	Medium variability
OG0000036	19	7	7	2	8	4	6	4	3	6	9	5	2	14	3	6	6.5625	4.48655	0.683665	105	104.0_108.0	0.228769	0.640044	High variability
OG0000037	7	5	7	6	5	4	5	9	6	5	8	7	7	7	8	8	6.5	1.41421	0.217571	104	104.0_108.0	0.228769	0.640044	Low variability
OG0000038	4	6	6	9	8	4	3	5	8	6	6	9	9	9	8	3	6.4375	2.18994	0.340185	103	100.0_104.0	0.382438	0.579618	Low variability
OG0000039	4	1	7	8	12	4	2	2	9	6	9	8	3	16	6	5	6.375	3.96443	0.621871	102	100.0_104.0	0.382438	0.579618	High variability
OG0000040	5	3	9	4	13	8	6	2	9	3	16	2	2	5	4	8	6.1875	4.08605	0.660372	99	96.0_100.0	0.320549	0.583832	High variability
OG0000041	3	6	6	5	9	7	2	5	6	9	8	4	3	8	10	8	6.1875	2.40052	0.387963	99	96.0_100.0	0.320549	0.583832	Medium variability
OG0000042	9	5	7	5	7	5	2	7	4	8	12	4	1	12	2	8	6.125	3.26343	0.532806	98	96.0_100.0	0.320549	0.583832	Medium variability
OG0000043	4	4	4	9	13	7	4	3	6	6	11	5	7	7	3	4	6.0625	2.88603	0.476046	97	96.0_100.0	0.320549	0.583832	Medium variability
OG0000044	5	5	5	6	4	7	6	10	7	6	6	6	6	6	6	5	6	1.31656	0.219427	96	96.0_100.0	0.320549	0.583832	Low variability
OG0000045	4	4	10	9	6	3	1	5	5	8	8	9	3	9	4	7	5.9375	2.6949	0.453878	95	92.0_96.0	0.297381	0.63925	Medium variability
OG0000046	6	3	6	7	7	4	7	3	7	5	14	3	5	5	6	7	5.9375	2.61964	0.441202	95	92.0_96.0	0.297381	0.63925	Medium variability
OG0000047	2	3	6	5	14	3	3	3	6	7	12	5	4	12	6	3	5.875	3.68556	0.627329	94	92.0_96.0	0.297381	0.63925	Medium variability
OG0000048	6	6	9	5	6	6	4	3	4	6	5	8	7	7	7	5	5.875	1.5438	0.262775	94	92.0_96.0	0.297381	0.63925	Low variability
OG0000049	2	0	5	11	6	6	8	6	7	7	6	7	6	7	7	3	5.875	2.52653	0.430047	94	92.0_96.0	0.297381	0.63925	Medium variability
OG0000050	7	3	18	3	5	7	6	4	4	10	6	0	0	9	3	8	5.8125	4.33926	0.746539	93	92.0_96.0	0.297381	0.63925	High variability
OG0000051	7	5	3	8	4	7	4	5	5	7	7	8	6	5	8	3	5.75	1.73205	0.301226	92	92.0_96.0	0.297381	0.63925	Medium variability
OG0000052	6	11	11	3	6	2	3	12	8	7	4	3	2	2	3	8	5.6875	3.47791	0.6115	91	88.0_92.0	0.279735	0.583872	High variability
OG0000053	2	1	11	11	6	4	3	6	4	5	9	7	3	9	7	2	5.625	3.18067	0.565453	90	88.0_92.0	0.279735	0.583872	Medium variability
OG0000054	4	4	8	8	8	4	5	1	6	6	7	5	4	8	7	4	5.5625	2.03204	0.36531	89	88.0_92.0	0.279735	0.583872	Medium variability
OG0000055	6	5	6	5	5	5	6	9	6	3	6	5	7	7	4	4	5.5625	1.41274	0.253976	89	88.0_92.0	0.279735	0.583872	Low variability
OG0000056	5	5	6	6	7	6	6	1	7	5	5	7	5	7	7	3	5.5	1.63299	0.296908	88	88.0_92.0	0.279735	0.583872	Medium variability
OG0000057	14	2	3	5	2	4	4	2	10	6	9	4	4	8	2	8	5.4375	3.4827	0.640496	87	84.0_88.0	0.284395	0.574193	High variability
OG0000058	8	3	4	7	6	6	3	3	8	8	7	4	2	4	5	8	5.375	2.12525	0.395394	86	84.0_88.0	0.284395	0.574193	Medium variability
OG0000059	6	4	7	4	7	5	9	5	4	7	6	3	5	7	2	5	5.375	1.78419	0.331942	86	84.0_88.0	0.284395	0.574193	Medium variability
OG0000060	7	6	9	2	5	6	5	6	3	6	14	2	5	6	0	4	5.375	3.18067	0.591753	86	84.0_88.0	0.284395	0.574193	High variability
OG0000061	3	5	7	4	6	7	5	7	5	3	6	7	7	4	5	4	5.3125	1.4477	0.272508	85	84.0_88.0	0.284395	0.574193	Low variability
OG0000062	4	6	4	5	6	6	5	7	4	4	7	6	5	5	5	6	5.3125	1.01448	0.190961	85	84.0_88.0	0.284395	0.574193	Low variability
OG0000063	4	1	5	5	5	5	5	3	8	9	5	5	7	7	5	5	5.25	1.87972	0.358041	84	84.0_88.0	0.284395	0.574193	Medium variability
OG0000064	2	2	8	8	8	4	4	2	5	6	7	10	4	8	4	2	5.25	2.64575	0.503953	84	84.0_88.0	0.284395	0.574193	Medium variability
OG0000065	8	4	10	3	3	6	8	7	6	3	6	5	2	2	3	8	5.25	2.48998	0.474282	84	84.0_88.0	0.284395	0.574193	Medium variability
OG0000066	6	5	8	6	6	3	6	4	5	6	3	8	5	4	6	2	5.1875	1.68201	0.324243	83	80.0_84.0	0.321249	0.74176	Medium variability
OG0000067	6	4	5	6	7	6	3	3	6	6	5	4	4	5	5	7	5.125	1.25831	0.245523	82	80.0_84.0	0.321249	0.74176	Low variability
OG0000068	5	4	7	2	3	3	7	6	5	5	4	5	2	11	3	10	5.125	2.60448	0.508192	82	80.0_84.0	0.321249	0.74176	Medium variability
OG0000069	2	15	6	2	2	6	4	8	12	2	6	6	1	2	4	4	5.125	3.87943	0.756963	82	80.0_84.0	0.321249	0.74176	High variability
OG0000070	17	2	5	3	4	5	4	5	7	4	7	1	4	6	1	6	5.0625	3.6782	0.726558	81	80.0_84.0	0.321249	0.74176	Medium variability
OG0000071	4	5	7	6	7	4	6	2	5	6	6	4	6	7	4	2	5.0625	1.61116	0.318254	81	80.0_84.0	0.321249	0.74176	Low variability
OG0000072	5	4	10	2	6	1	7	7	6	6	2	7	8	3	4	3	5.0625	2.48914	0.491683	81	80.0_84.0	0.321249	0.74176	Medium variability
OG0000073	8	2	11	1	6	2	2	4	4	5	7	7	1	9	3	9	5.0625	3.17214	0.626596	81	80.0_84.0	0.321249	0.74176	Medium variability
OG0000074	3	6	9	4	4	3	2	11	5	4	5	7	4	4	6	4	5.0625	2.32289	0.458843	81	80.0_84.0	0.321249	0.74176	Medium variability
OG0000075	5	3	5	7	6	9	2	9	2	6	2	4	6	5	3	6	5	2.25093	0.450185	80	80.0_84.0	0.321249	0.74176	Medium variability
OG0000076	0	0	2	0	0	0	0	78	0	0	0	0	0	0	0	0	5	19.4731	3.89461	80	80.0_84.0	0.321249	0.74176	High variability
OG0000077	4	4	6	6	6	3	6	8	6	4	5	5	4	4	6	2	4.9375	1.48183	0.300118	79	76.0_80.0	0.216056	0.687519	Medium variability
OG0000078	3	10	6	3	3	5	3	3	3	5	12	0	3	9	0	11	4.9375	3.69628	0.748614	79	76.0_80.0	0.216056	0.687519	High variability
OG0000079	6	5	5	5	5	4	5	3	5	5	7	6	5	3	5	4	4.875	1.0247	0.210194	78	76.0_80.0	0.216056	0.687519	Low variability
OG0000080	3	4	4	4	7	5	4	5	5	6	4	4	5	6	6	5	4.8125	1.04682	0.217521	77	76.0_80.0	0.216056	0.687519	Medium variability
OG0000081	5	2	13	3	2	6	3	1	4	9	6	4	2	6	3	8	4.8125	3.14576	0.653665	77	76.0_80.0	0.216056	0.687519	Medium variability
OG0000082	5	4	5	5	6	6	5	4	5	6	6	3	4	3	5	5	4.8125	0.981071	0.203859	77	76.0_80.0	0.216056	0.687519	Low variability
OG0000083	1	1	6	9	10	4	4	7	6	6	6	4	3	7	2	1	4.8125	2.78613	0.578935	77	76.0_80.0	0.216056	0.687519	Medium variability
OG0000084	0	4	14	3	8	3	7	3	8	3	7	2	1	7	1	6	4.8125	3.60035	0.748124	77	76.0_80.0	0.216056	0.687519	High variability
OG0000085	4	3	2	5	4	3	5	4	5	7	5	6	7	5	6	5	4.75	1.39044	0.292725	76	76.0_80.0	0.216056	0.687519	Medium variability
OG0000086	2	2	7	8	4	2	2	3	7	3	6	3	2	12	10	3	4.75	3.19374	0.672367	76	76.0_80.0	0.216056	0.687519	Medium variability
OG0000087	6	2	2	4	3	6	6	2	6	5	4	6	6	5	9	4	4.75	1.91485	0.403127	76	76.0_80.0	0.216056	0.687519	Medium variability
OG0000088	5	4	4	4	5	5	3	7	6	3	5	3	5	5	6	6	4.75	1.18322	0.249098	76	76.0_80.0	0.216056	0.687519	Medium variability
OG0000089	3	6	6	4	3	4	8	4	6	5	6	6	3	3	4	5	4.75	1.48324	0.312261	76	76.0_80.0	0.216056	0.687519	Medium variability
OG0000090	5	3	3	7	5	8	6	8	6	2	3	5	3	2	6	3	4.6875	2.02382	0.431748	75	72.0_76.0	0.285828	0.562626	Medium variability
OG0000091	6	3	5	3	7	4	4	5	4	3	6	4	3	9	4	5	4.6875	1.66208	0.354576	75	72.0_76.0	0.285828	0.562626	Medium variability
OG0000092	5	2	6	4	6	5	3	2	2	4	6	3	4	9	6	7	4.625	1.99583	0.431531	74	72.0_76.0	0.285828	0.562626	Medium variability
OG0000093	4	5	10	3	3	8	3	10	1	5	2	4	4	5	6	1	4.625	2.75379	0.595413	74	72.0_76.0	0.285828	0.562626	High variability
OG0000094	8	6	3	4	3	5	2	6	2	5	4	4	4	5	4	8	4.5625	1.78769	0.391822	73	72.0_76.0	0.285828	0.562626	Medium variability
OG0000095	5	5	6	4	5	4	3	5	3	4	5	5	4	5	5	5	4.5625	0.813941	0.178398	73	72.0_76.0	0.285828	0.562626	Low variability
OG0000096	2	1	12	3	6	4	3	3	5	8	4	7	3	5	4	3	4.5625	2.68251	0.587946	73	72.0_76.0	0.285828	0.562626	High variability
OG0000098	5	3	6	5	5	4	4	4	6	5	4	5	3	5	3	5	4.5	0.966092	0.214687	72	72.0_76.0	0.285828	0.562626	Low variability
OG0000099	3	6	4	4	6	5	4	3	2	7	9	4	7	2	3	3	4.5	2	0.444444	72	72.0_76.0	0.285828	0.562626	Medium variability
OG0000100	7	6	5	5	2	3	4	5	6	4	4	4	3	5	3	6	4.5	1.36626	0.303613	72	72.0_76.0	0.285828	0.562626	Medium variability
OG0000101	6	3	9	4	4	4	4	4	4	4	4	4	6	6	2	4	4.5	1.59164	0.353699	72	72.0_76.0	0.285828	0.562626	Medium variability
OG0000102	4	8	7	5	5	2	3	3	4	5	8	4	3	4	6	1	4.5	2	0.444444	72	72.0_76.0	0.285828	0.562626	Medium variability
OG0000103	3	1	6	5	3	6	3	2	7	7	6	5	1	8	8	1	4.5	2.50333	0.556296	72	72.0_76.0	0.285828	0.562626	Medium variability
OG0000104	4	3	5	5	4	4	4	5	6	4	5	6	5	3	5	3	4.4375	0.963933	0.217224	71	68.0_72.0	0.22657	0.608354	Low variability
OG0000105	4	4	3	3	8	6	1	3	6	4	9	4	3	8	1	4	4.4375	2.36555	0.533082	71	68.0_72.0	0.22657	0.608354	Medium variability
OG0000106	5	5	5	4	6	4	7	4	4	3	6	6	4	1	3	4	4.4375	1.45917	0.328826	71	68.0_72.0	0.22657	0.608354	Medium variability
OG0000107	4	3	4	2	6	6	5	6	4	2	5	6	4	4	4	6	4.4375	1.36473	0.307546	71	68.0_72.0	0.22657	0.608354	Medium variability
OG0000108	1	4	4	7	8	4	3	3	4	4	5	4	2	10	4	4	4.4375	2.22017	0.500321	71	68.0_72.0	0.22657	0.608354	Medium variability
OG0000109	3	2	4	8	9	3	4	2	4	4	5	3	5	4	7	4	4.4375	1.99896	0.450469	71	68.0_72.0	0.22657	0.608354	Medium variability
OG0000110	5	5	6	4	6	4	4	2	3	4	5	5	5	4	4	4	4.375	1.0247	0.234216	70	68.0_72.0	0.22657	0.608354	Medium variability
OG0000111	2	0	9	0	3	7	4	5	6	3	5	6	1	6	3	10	4.375	2.94109	0.672249	70	68.0_72.0	0.22657	0.608354	High variability
OG0000112	5	3	8	2	7	3	3	2	4	5	3	3	3	12	4	2	4.3125	2.67628	0.620588	69	68.0_72.0	0.22657	0.608354	High variability
OG0000113	9	0	4	6	5	3	7	4	5	0	4	5	4	5	3	5	4.3125	2.24258	0.520019	69	68.0_72.0	0.22657	0.608354	Medium variability
OG0000114	2	0	10	4	8	3	5	4	3	6	3	9	1	6	2	3	4.3125	2.84532	0.659784	69	68.0_72.0	0.22657	0.608354	High variability
OG0000115	5	4	6	4	4	6	3	1	5	5	5	4	4	6	4	3	4.3125	1.30224	0.301969	69	68.0_72.0	0.22657	0.608354	Medium variability
OG0000116	6	3	3	3	6	4	5	2	3	5	8	6	4	5	4	2	4.3125	1.66208	0.385409	69	68.0_72.0	0.22657	0.608354	Medium variability
OG0000117	4	5	6	5	4	5	3	3	5	4	3	6	5	4	4	3	4.3125	1.01448	0.235241	69	68.0_72.0	0.22657	0.608354	Medium variability
OG0000118	3	3	4	5	5	4	5	3	4	5	5	5	5	5	4	3	4.25	0.856349	0.201494	68	68.0_72.0	0.22657	0.608354	Low variability
OG0000119	4	3	4	5	4	4	4	5	4	4	5	5	4	3	6	4	4.25	0.774597	0.182258	68	68.0_72.0	0.22657	0.608354	Low variability
OG0000120	4	2	6	4	5	3	5	3	4	6	7	2	4	6	6	1	4.25	1.73205	0.407541	68	68.0_72.0	0.22657	0.608354	Medium variability
OG0000121	0	2	7	3	6	4	3	4	3	5	9	8	3	7	3	1	4.25	2.54296	0.598345	68	68.0_72.0	0.22657	0.608354	Medium variability
OG0000122	8	5	3	2	4	4	3	5	3	6	13	0	3	5	2	1	4.1875	3.05982	0.730703	67	64.0_68.0	0.273861	0.697149	High variability
OG0000123	4	5	4	3	4	4	4	5	6	3	5	4	5	2	4	5	4.1875	0.981071	0.234286	67	64.0_68.0	0.273861	0.697149	Low variability
OG0000124	5	3	7	3	7	3	3	2	4	4	4	5	4	5	4	4	4.1875	1.37689	0.32881	67	64.0_68.0	0.273861	0.697149	Medium variability
OG0000125	2	3	8	4	7	4	1	1	3	3	4	7	4	7	7	2	4.1875	2.31571	0.553005	67	64.0_68.0	0.273861	0.697149	Medium variability
OG0000126	5	3	7	1	5	4	5	3	3	4	5	4	5	4	2	7	4.1875	1.60078	0.382276	67	64.0_68.0	0.273861	0.697149	Medium variability
OG0000127	1	7	5	1	7	8	2	1	6	4	8	3	4	6	1	3	4.1875	2.58763	0.617942	67	64.0_68.0	0.273861	0.697149	Medium variability
OG0000128	3	5	3	5	4	7	2	3	5	5	3	6	2	6	2	6	4.1875	1.6419	0.392095	67	64.0_68.0	0.273861	0.697149	Medium variability
OG0000129	5	3	5	3	4	5	4	4	4	4	8	3	3	3	3	6	4.1875	1.37689	0.32881	67	64.0_68.0	0.273861	0.697149	Medium variability
OG0000130	2	2	6	12	4	8	1	4	5	8	4	3	1	4	3	0	4.1875	3.10309	0.741036	67	64.0_68.0	0.273861	0.697149	High variability
OG0000131	0	1	3	0	0	0	0	60	0	1	0	0	0	0	0	2	4.1875	14.9096	3.5605	67	64.0_68.0	0.273861	0.697149	High variability
OG0000132	4	3	5	4	4	5	6	3	5	3	4	5	4	3	4	4	4.125	0.885061	0.21456	66	64.0_68.0	0.273861	0.697149	Low variability
OG0000133	3	4	7	3	4	8	3	2	6	0	9	3	2	5	0	7	4.125	2.68017	0.649739	66	64.0_68.0	0.273861	0.697149	Medium variability
OG0000134	4	2	9	1	9	4	8	2	1	2	6	2	3	7	1	5	4.125	2.87228	0.696311	66	64.0_68.0	0.273861	0.697149	Medium variability
OG0000135	4	3	1	5	4	1	6	2	5	5	6	3	5	10	4	1	4.0625	2.32289	0.571789	65	64.0_68.0	0.273861	0.697149	Medium variability
OG0000136	3	1	1	5	5	4	1	3	6	5	5	3	3	9	7	4	4.0625	2.20511	0.542796	65	64.0_68.0	0.273861	0.697149	Medium variability
OG0000137	6	6	4	4	4	4	5	4	3	5	3	4	2	3	4	4	4.0625	1.06262	0.261569	65	64.0_68.0	0.273861	0.697149	Low variability
OG0000138	2	7	5	5	3	5	1	3	3	4	6	6	2	2	5	6	4.0625	1.80624	0.444613	65	64.0_68.0	0.273861	0.697149	Medium variability
OG0000139	6	0	8	1	7	3	4	5	2	2	7	3	0	6	2	9	4.0625	2.86284	0.704698	65	64.0_68.0	0.273861	0.697149	High variability
OG0000140	4	4	4	5	4	5	4	3	5	3	4	5	4	4	6	1	4.0625	1.12361	0.276581	65	64.0_68.0	0.273861	0.697149	Medium variability
OG0000141	5	3	5	4	1	4	3	1	5	5	4	7	5	2	6	5	4.0625	1.69189	0.416466	65	64.0_68.0	0.273861	0.697149	Medium variability
OG0000142	1	1	2	5	5	1	3	1	7	8	5	5	3	8	4	6	4.0625	2.46221	0.606084	65	64.0_68.0	0.273861	0.697149	Medium variability
OG0000143	7	2	4	3	5	3	3	4	4	4	6	4	3	3	5	4	4	1.26491	0.316228	64	64.0_68.0	0.273861	0.697149	Medium variability
OG0000144	6	4	6	3	3	3	5	3	3	4	5	4	2	5	3	5	4	1.21106	0.302765	64	64.0_68.0	0.273861	0.697149	Medium variability
OG0000145	3	3	5	4	6	6	3	3	3	3	3	4	6	5	3	4	4	1.21106	0.302765	64	64.0_68.0	0.273861	0.697149	Medium variability
OG0000146	4	3	3	4	4	5	5	5	5	4	6	3	5	3	2	3	4	1.09545	0.273861	64	64.0_68.0	0.273861	0.697149	Medium variability
OG0000147	5	5	5	4	2	3	4	4	3	2	6	4	4	4	4	5	4	1.09545	0.273861	64	64.0_68.0	0.273861	0.697149	Medium variability
OG0000148	5	6	4	5	2	3	3	3	3	7	5	8	3	2	3	2	4	1.82574	0.456435	64	64.0_68.0	0.273861	0.697149	Medium variability
OG0000149	1	1	4	4	3	8	1	4	4	3	6	5	2	9	5	3	3.9375	2.32289	0.589941	63	60.0_64.0	0.288579	0.616236	Medium variability
OG0000150	5	4	4	5	3	2	3	3	3	6	5	3	3	4	6	4	3.9375	1.18145	0.300052	63	60.0_64.0	0.288579	0.616236	Medium variability
OG0000151	7	4	4	2	5	2	2	16	3	5	3	1	2	1	2	4	3.9375	3.60497	0.915549	63	60.0_64.0	0.288579	0.616236	High variability
OG0000152	6	4	8	5	4	6	2	3	3	2	5	2	5	2	1	5	3.9375	1.91377	0.486036	63	60.0_64.0	0.288579	0.616236	Medium variability
OG0000153	4	7	2	3	5	4	3	4	3	5	5	4	3	3	5	3	3.9375	1.23659	0.314056	63	60.0_64.0	0.288579	0.616236	Medium variability
OG0000154	3	6	1	5	6	3	3	1	6	4	4	4	3	3	6	5	3.9375	1.65202	0.41956	63	60.0_64.0	0.288579	0.616236	Medium variability
OG0000155	3	7	5	6	3	2	5	6	4	5	3	5	2	3	2	2	3.9375	1.65202	0.41956	63	60.0_64.0	0.288579	0.616236	Medium variability
OG0000156	3	3	4	4	3	5	3	5	3	5	4	5	3	4	4	4	3.875	0.806226	0.208058	62	60.0_64.0	0.288579	0.616236	Low variability
OG0000157	3	2	3	5	4	4	3	4	6	3	3	4	5	4	6	3	3.875	1.14746	0.296119	62	60.0_64.0	0.288579	0.616236	Medium variability
OG0000158	4	5	4	2	3	4	4	4	3	4	4	4	4	4	3	6	3.875	0.885061	0.228403	62	60.0_64.0	0.288579	0.616236	Low variability
OG0000159	3	5	5	4	5	3	1	6	3	3	4	3	3	4	5	5	3.875	1.25831	0.324724	62	60.0_64.0	0.288579	0.616236	Medium variability
OG0000160	3	4	3	5	6	4	3	3	5	3	4	4	2	6	4	3	3.875	1.14746	0.296119	62	60.0_64.0	0.288579	0.616236	Medium variability
OG0000161	4	4	4	3	6	4	3	3	5	4	3	5	2	3	4	5	3.875	1.0247	0.264437	62	60.0_64.0	0.288579	0.616236	Low variability
OG0000162	2	1	2	1	6	7	2	2	9	7	8	4	1	4	1	5	3.875	2.77789	0.716875	62	60.0_64.0	0.288579	0.616236	High variability
OG0000163	1	1	4	6	7	5	1	2	4	5	4	3	5	6	6	2	3.875	1.99583	0.515053	62	60.0_64.0	0.288579	0.616236	Medium variability
OG0000164	0	4	8	5	6	4	3	3	1	3	5	6	3	6	2	3	3.875	2.06155	0.532014	62	60.0_64.0	0.288579	0.616236	Medium variability
OG0000165	4	2	3	4	7	4	5	3	2	3	9	2	2	5	3	3	3.8125	1.93972	0.508778	61	60.0_64.0	0.288579	0.616236	Medium variability
OG0000166	5	5	4	2	4	2	5	1	2	5	5	3	3	9	2	4	3.8125	1.93972	0.508778	61	60.0_64.0	0.288579	0.616236	Medium variability
OG0000167	10	8	3	2	1	3	4	3	5	3	5	1	3	6	0	4	3.8125	2.58763	0.678723	61	60.0_64.0	0.288579	0.616236	High variability
OG0000168	2	2	4	4	2	4	3	2	5	6	5	2	2	6	9	3	3.8125	2.00728	0.526499	61	60.0_64.0	0.288579	0.616236	Medium variability
OG0000169	4	4	2	3	5	3	4	3	4	5	4	4	4	3	4	5	3.8125	0.834166	0.218798	61	60.0_64.0	0.288579	0.616236	Low variability
OG0000170	3	3	6	3	3	4	3	4	5	3	3	5	3	5	5	3	3.8125	1.04682	0.274576	61	60.0_64.0	0.288579	0.616236	Low variability
OG0000171	5	3	1	4	5	2	3	2	5	7	5	5	3	3	4	4	3.8125	1.5152	0.39743	61	60.0_64.0	0.288579	0.616236	Medium variability
OG0000172	4	3	12	4	3	4	3	3	2	3	2	4	3	3	7	1	3.8125	2.53558	0.66507	61	60.0_64.0	0.288579	0.616236	High variability
OG0000173	2	6	3	2	7	3	5	2	2	3	7	2	5	3	4	4	3.75	1.77012	0.472033	60	60.0_64.0	0.288579	0.616236	Medium variability
OG0000174	2	2	2	3	4	5	4	4	6	5	3	5	4	3	4	4	3.75	1.18322	0.315524	60	60.0_64.0	0.288579	0.616236	Medium variability
OG0000175	7	8	5	5	2	4	5	2	3	4	1	2	3	2	2	5	3.75	1.98326	0.52887	60	60.0_64.0	0.288579	0.616236	Medium variability
OG0000176	8	3	4	2	5	5	3	1	3	3	7	2	4	2	2	6	3.75	1.98326	0.52887	60	60.0_64.0	0.288579	0.616236	Medium variability
OG0000177	2	1	12	2	3	1	0	0	3	6	4	4	1	11	5	5	3.75	3.53082	0.941551	60	60.0_64.0	0.288579	0.616236	High variability
OG0000178	3	3	6	4	6	4	4	2	3	4	4	4	3	4	4	2	3.75	1.12546	0.300123	60	60.0_64.0	0.288579	0.616236	Medium variability
OG0000179	3	2	7	3	1	6	5	3	4	7	3	2	4	3	4	3	3.75	1.73205	0.46188	60	60.0_64.0	0.288579	0.616236	Medium variability
OG0000180	1	3	5	6	3	4	2	4	3	5	7	5	3	4	2	3	3.75	1.57056	0.418817	60	60.0_64.0	0.288579	0.616236	Medium variability
OG0000181	4	4	4	2	4	3	5	4	2	3	4	4	6	3	4	3	3.6875	1.01448	0.275113	59	56.0_60.0	0.23522	0.616172	Medium variability
OG0000182	4	4	4	4	4	3	4	3	3	4	4	2	4	4	4	4	3.6875	0.60208	0.163276	59	56.0_60.0	0.23522	0.616172	Low variability
OG0000183	3	3	5	3	4	4	2	3	3	4	4	5	4	3	5	4	3.6875	0.873212	0.236803	59	56.0_60.0	0.23522	0.616172	Medium variability
OG0000184	5	2	7	2	5	2	1	5	5	5	7	2	0	4	1	6	3.6875	2.24258	0.608157	59	56.0_60.0	0.23522	0.616172	Medium variability
OG0000185	4	4	4	4	3	4	5	1	3	3	4	4	5	3	4	4	3.6875	0.946485	0.256674	59	56.0_60.0	0.23522	0.616172	Medium variability
OG0000186	4	2	4	4	3	4	5	2	4	4	5	9	2	2	3	2	3.6875	1.77834	0.482262	59	56.0_60.0	0.23522	0.616172	Medium variability
OG0000187	2	5	3	4	3	5	1	2	4	6	4	5	3	5	3	4	3.6875	1.35247	0.366771	59	56.0_60.0	0.23522	0.616172	Medium variability
OG0000188	3	4	6	4	4	4	4	3	2	2	3	6	3	3	5	3	3.6875	1.19548	0.324197	59	56.0_60.0	0.23522	0.616172	Medium variability
OG0000189	4	1	3	3	3	1	4	5	2	1	6	5	9	5	2	5	3.6875	2.15155	0.583471	59	56.0_60.0	0.23522	0.616172	Medium variability
OG0000190	4	2	6	2	8	5	4	4	4	4	5	0	3	1	5	2	3.6875	1.9906	0.539825	59	56.0_60.0	0.23522	0.616172	Medium variability
OG0000191	5	5	3	1	8	3	2	3	1	3	10	1	3	2	2	6	3.625	2.57876	0.711382	58	56.0_60.0	0.23522	0.616172	High variability
OG0000192	3	4	4	5	4	2	4	3	3	3	4	4	4	3	4	4	3.625	0.718795	0.198288	58	56.0_60.0	0.23522	0.616172	Low variability
OG0000193	5	5	4	3	3	3	7	5	2	2	5	3	3	3	2	3	3.625	1.40831	0.388499	58	56.0_60.0	0.23522	0.616172	Medium variability
OG0000194	3	4	5	3	7	4	4	1	3	3	5	4	2	3	3	4	3.625	1.36015	0.375213	58	56.0_60.0	0.23522	0.616172	Medium variability
OG0000195	6	7	2	3	5	3	4	3	2	3	5	5	2	3	1	4	3.625	1.62788	0.449071	58	56.0_60.0	0.23522	0.616172	Medium variability
OG0000196	5	5	7	2	4	1	3	2	4	5	5	4	1	3	5	2	3.625	1.70783	0.471124	58	56.0_60.0	0.23522	0.616172	Medium variability
OG0000197	3	1	7	4	3	4	3	3	1	8	3	4	4	3	4	3	3.625	1.78419	0.49219	58	56.0_60.0	0.23522	0.616172	Medium variability
OG0000198	4	1	6	3	8	1	4	2	0	4	4	5	4	2	4	6	3.625	2.09364	0.577556	58	56.0_60.0	0.23522	0.616172	Medium variability
OG0000199	6	2	4	2	4	2	7	3	3	6	5	4	4	1	1	3	3.5625	1.78769	0.501808	57	56.0_60.0	0.23522	0.616172	Medium variability
OG0000200	5	5	0	4	2	4	2	3	4	3	5	2	6	2	6	4	3.5625	1.67207	0.469354	57	56.0_60.0	0.23522	0.616172	Medium variability
OG0000201	4	3	6	5	4	2	2	5	3	2	4	1	4	3	5	4	3.5625	1.36473	0.383083	57	56.0_60.0	0.23522	0.616172	Medium variability
OG0000202	4	4	4	4	4	3	4	3	4	4	4	5	3	3	3	1	3.5625	0.892095	0.250413	57	56.0_60.0	0.23522	0.616172	Medium variability
OG0000203	3	3	3	5	4	4	3	3	4	4	4	4	3	2	4	4	3.5625	0.727438	0.204193	57	56.0_60.0	0.23522	0.616172	Low variability
OG0000204	3	5	6	7	1	3	2	2	4	5	3	4	2	4	5	1	3.5625	1.75	0.491228	57	56.0_60.0	0.23522	0.616172	Medium variability
OG0000205	4	4	4	3	4	4	2	4	3	3	4	4	4	3	4	3	3.5625	0.629153	0.176604	57	56.0_60.0	0.23522	0.616172	Low variability
OG0000206	1	6	4	5	2	7	2	4	1	3	6	5	5	4	1	1	3.5625	2.03204	0.570396	57	56.0_60.0	0.23522	0.616172	Medium variability
OG0000207	3	4	3	4	4	4	3	4	2	3	3	4	3	4	4	5	3.5625	0.727438	0.204193	57	56.0_60.0	0.23522	0.616172	Low variability
OG0000208	3	4	2	2	4	3	4	2	4	4	3	4	7	4	3	4	3.5625	1.20934	0.339463	57	56.0_60.0	0.23522	0.616172	Medium variability
OG0000209	2	3	3	5	4	3	4	3	5	3	4	4	3	5	5	1	3.5625	1.15289	0.32362	57	56.0_60.0	0.23522	0.616172	Medium variability
OG0000210	7	3	6	2	2	4	1	0	7	6	8	1	3	2	0	4	3.5	2.60768	0.745052	56	56.0_60.0	0.23522	0.616172	High variability
OG0000211	3	3	8	0	4	7	3	3	5	1	5	1	1	4	5	3	3.5	2.19089	0.625969	56	56.0_60.0	0.23522	0.616172	High variability
OG0000212	4	4	2	3	4	3	6	3	4	3	3	3	4	2	4	4	3.5	0.966092	0.276026	56	56.0_60.0	0.23522	0.616172	Medium variability
OG0000213	4	3	4	5	3	2	3	3	3	3	6	3	4	4	3	3	3.5	0.966092	0.276026	56	56.0_60.0	0.23522	0.616172	Medium variability
OG0000214	5	3	4	3	3	4	4	2	4	3	3	3	3	3	4	5	3.5	0.816497	0.233285	56	56.0_60.0	0.23522	0.616172	Low variability
OG0000215	6	5	3	3	3	3	5	0	4	3	1	4	4	3	3	6	3.5	1.59164	0.454756	56	56.0_60.0	0.23522	0.616172	Medium variability
OG0000216	3	10	6	0	1	2	2	6	6	3	7	0	1	3	0	6	3.5	2.98887	0.853962	56	56.0_60.0	0.23522	0.616172	High variability
OG0000217	3	6	9	2	4	1	2	2	8	4	2	3	0	4	4	2	3.5	2.42212	0.692034	56	56.0_60.0	0.23522	0.616172	High variability
OG0000218	0	2	6	4	8	1	1	3	7	4	7	3	0	7	1	2	3.5	2.73252	0.78072	56	56.0_60.0	0.23522	0.616172	High variability
OG0000219	2	2	4	3	5	4	1	2	4	3	5	4	2	9	2	3	3.4375	1.89627	0.551642	55	52.0_56.0	0.270378	0.595068	Medium variability
OG0000220	6	3	3	1	4	4	1	3	7	4	3	2	2	3	2	7	3.4375	1.86078	0.541318	55	52.0_56.0	0.270378	0.595068	Medium variability
OG0000221	5	3	4	6	2	4	2	3	5	3	4	3	3	3	3	2	3.4375	1.15289	0.335388	55	52.0_56.0	0.270378	0.595068	Medium variability
OG0000222	5	3	2	4	3	4	2	2	5	3	7	2	0	7	4	2	3.4375	1.89627	0.551642	55	52.0_56.0	0.270378	0.595068	Medium variability
OG0000223	4	0	5	6	8	2	3	0	2	4	4	2	5	4	5	1	3.4375	2.18994	0.637073	55	52.0_56.0	0.270378	0.595068	High variability
OG0000224	5	3	4	4	2	2	4	2	4	3	3	2	3	4	1	9	3.4375	1.8246	0.530793	55	52.0_56.0	0.270378	0.595068	Medium variability
OG0000225	4	4	3	3	4	4	3	3	3	3	4	4	4	3	3	3	3.4375	0.512348	0.149047	55	52.0_56.0	0.270378	0.595068	Low variability
OG0000226	3	2	3	6	4	5	4	2	3	3	3	3	3	4	3	4	3.4375	1.03078	0.299862	55	52.0_56.0	0.270378	0.595068	Medium variability
OG0000227	7	2	3	3	7	5	3	3	2	3	2	4	3	2	3	3	3.4375	1.59034	0.462643	55	52.0_56.0	0.270378	0.595068	Medium variability
OG0000228	5	3	6	4	2	2	7	3	3	2	2	2	3	4	3	4	3.4375	1.50416	0.437574	55	52.0_56.0	0.270378	0.595068	Medium variability
OG0000229	2	0	6	4	3	5	2	4	3	3	5	2	3	5	5	3	3.4375	1.54785	0.450283	55	52.0_56.0	0.270378	0.595068	Medium variability
OG0000230	2	3	4	5	5	3	3	3	3	3	3	4	5	3	3	3	3.4375	0.892095	0.259519	55	52.0_56.0	0.270378	0.595068	Low variability
OG0000231	1	0	4	5	2	3	1	5	5	6	1	2	3	7	5	5	3.4375	2.09662	0.609927	55	52.0_56.0	0.270378	0.595068	High variability
OG0000232	3	4	4	3	4	4	2	2	2	4	3	4	4	3	4	4	3.375	0.806226	0.238882	54	52.0_56.0	0.270378	0.595068	Low variability
OG0000233	4	5	6	2	3	2	8	3	3	3	1	3	3	4	2	2	3.375	1.74642	0.517459	54	52.0_56.0	0.270378	0.595068	Medium variability
OG0000234	3	2	3	5	2	4	2	4	4	4	2	4	2	5	4	4	3.375	1.08781	0.322314	54	52.0_56.0	0.270378	0.595068	Medium variability
OG0000235	3	5	4	3	3	5	3	5	4	3	4	3	2	2	2	3	3.375	1.0247	0.303613	54	52.0_56.0	0.270378	0.595068	Medium variability
OG0000236	4	3	4	4	3	6	2	3	3	4	3	3	2	4	4	2	3.375	1.0247	0.303613	54	52.0_56.0	0.270378	0.595068	Medium variability
OG0000237	3	4	3	6	6	3	4	3	3	4	6	1	1	3	2	2	3.375	1.5864	0.470045	54	52.0_56.0	0.270378	0.595068	Medium variability
OG0000238	3	2	2	3	5	3	4	4	3	6	5	4	3	3	3	1	3.375	1.25831	0.372831	54	52.0_56.0	0.270378	0.595068	Medium variability
OG0000239	2	3	5	3	4	3	3	2	2	2	4	5	5	3	5	3	3.375	1.14746	0.339988	54	52.0_56.0	0.270378	0.595068	Medium variability
OG0000240	2	3	4	4	5	2	4	2	4	4	4	3	3	3	4	3	3.375	0.885061	0.26224	54	52.0_56.0	0.270378	0.595068	Low variability
OG0000241	5	4	0	2	7	4	3	2	3	6	4	3	2	1	5	3	3.375	1.82117	0.539606	54	52.0_56.0	0.270378	0.595068	Medium variability
OG0000242	3	3	3	5	3	2	6	3	3	3	3	5	4	4	2	2	3.375	1.14746	0.339988	54	52.0_56.0	0.270378	0.595068	Medium variability
OG0000243	0	2	7	4	3	4	1	5	4	5	3	4	0	5	5	2	3.375	1.96214	0.581375	54	52.0_56.0	0.270378	0.595068	Medium variability
OG0000244	2	2	3	3	1	5	4	5	4	5	2	2	4	5	4	2	3.3125	1.35247	0.408292	53	52.0_56.0	0.270378	0.595068	Medium variability
OG0000245	5	2	3	4	6	4	3	3	1	3	6	2	2	2	4	3	3.3125	1.4477	0.437041	53	52.0_56.0	0.270378	0.595068	Medium variability
OG0000246	4	2	5	4	1	3	3	3	2	3	4	4	2	5	4	4	3.3125	1.13835	0.343652	53	52.0_56.0	0.270378	0.595068	Medium variability
OG0000247	6	2	3	3	8	4	2	3	4	2	5	2	2	2	3	2	3.3125	1.74045	0.525419	53	52.0_56.0	0.270378	0.595068	Medium variability
OG0000248	2	4	2	3	4	3	3	1	4	3	4	2	4	7	2	5	3.3125	1.4477	0.437041	53	52.0_56.0	0.270378	0.595068	Medium variability
OG0000249	5	2	2	4	5	3	2	4	2	4	6	3	2	4	2	3	3.3125	1.30224	0.39313	53	52.0_56.0	0.270378	0.595068	Medium variability
OG0000250	3	4	3	4	4	3	4	3	3	4	3	3	3	3	3	3	3.3125	0.478714	0.144517	53	52.0_56.0	0.270378	0.595068	Low variability
OG0000251	3	4	5	4	2	1	3	3	2	3	6	6	2	4	2	3	3.3125	1.4477	0.437041	53	52.0_56.0	0.270378	0.595068	Medium variability
OG0000252	3	5	2	3	5	5	5	3	4	3	3	2	2	2	2	4	3.3125	1.19548	0.360899	53	52.0_56.0	0.270378	0.595068	Medium variability
OG0000253	6	3	3	3	0	2	1	5	7	3	5	3	3	4	0	5	3.3125	1.9906	0.600937	53	52.0_56.0	0.270378	0.595068	High variability
OG0000254	3	4	3	3	3	3	4	4	3	3	4	3	4	3	4	2	3.3125	0.60208	0.18176	53	52.0_56.0	0.270378	0.595068	Low variability
OG0000255	6	4	6	3	3	1	1	3	3	2	3	4	3	3	3	5	3.3125	1.4477	0.437041	53	52.0_56.0	0.270378	0.595068	Medium variability
OG0000256	4	3	3	3	3	3	4	3	3	3	4	3	4	3	3	4	3.3125	0.478714	0.144517	53	52.0_56.0	0.270378	0.595068	Low variability
OG0000257	4	5	4	3	3	1	3	4	2	2	4	3	2	5	4	4	3.3125	1.13835	0.343652	53	52.0_56.0	0.270378	0.595068	Medium variability
OG0000258	3	4	4	2	5	4	3	2	2	4	3	4	2	5	3	3	3.3125	1.01448	0.306258	53	52.0_56.0	0.270378	0.595068	Medium variability
OG0000259	1	0	8	4	2	1	2	0	2	5	7	6	2	8	3	2	3.3125	2.70108	0.81542	53	52.0_56.0	0.270378	0.595068	High variability
OG0000260	2	2	8	3	4	5	8	2	3	4	7	1	2	0	1	1	3.3125	2.5224	0.761479	53	52.0_56.0	0.270378	0.595068	High variability
OG0000261	2	4	7	4	3	2	3	5	3	3	5	3	3	2	2	2	3.3125	1.40089	0.422911	53	52.0_56.0	0.270378	0.595068	Medium variability
OG0000262	0	0	1	0	0	0	0	52	0	0	0	0	0	0	0	0	3.3125	12.9857	3.92022	53	52.0_56.0	0.270378	0.595068	High variability
OG0000263	5	3	4	3	3	4	3	3	3	2	4	2	3	4	3	3	3.25	0.774597	0.238337	52	52.0_56.0	0.270378	0.595068	Low variability
OG0000264	5	2	3	2	4	3	3	3	4	2	4	4	4	2	4	3	3.25	0.930949	0.286446	52	52.0_56.0	0.270378	0.595068	Medium variability
OG0000265	3	5	3	2	4	2	3	3	4	2	3	2	3	4	4	5	3.25	1	0.307692	52	52.0_56.0	0.270378	0.595068	Medium variability
OG0000266	5	3	4	4	3	3	3	3	3	2	5	2	3	4	3	2	3.25	0.930949	0.286446	52	52.0_56.0	0.270378	0.595068	Medium variability
OG0000267	3	6	7	1	5	5	1	2	1	2	5	3	2	6	1	2	3.25	2.08167	0.640513	52	52.0_56.0	0.270378	0.595068	High variability
OG0000268	3	4	4	2	3	2	2	3	3	3	4	3	3	5	4	4	3.25	0.856349	0.263492	52	52.0_56.0	0.270378	0.595068	Low variability
OG0000269	5	4	4	3	2	1	4	1	4	3	7	3	3	2	1	5	3.25	1.65328	0.508701	52	52.0_56.0	0.270378	0.595068	Medium variability
OG0000270	5	1	5	1	9	2	3	1	3	2	4	4	2	3	2	5	3.25	2.08167	0.640513	52	52.0_56.0	0.270378	0.595068	High variability
OG0000271	5	1	3	1	4	7	3	2	3	1	8	2	2	4	1	5	3.25	2.14476	0.659926	52	52.0_56.0	0.270378	0.595068	High variability
OG0000272	4	3	5	3	2	1	3	5	3	4	4	3	3	3	4	2	3.25	1.06458	0.327563	52	52.0_56.0	0.270378	0.595068	Medium variability
OG0000273	2	3	5	2	4	3	3	1	4	4	7	2	3	3	3	3	3.25	1.39044	0.427829	52	52.0_56.0	0.270378	0.595068	Medium variability
OG0000274	3	2	2	4	5	3	2	3	5	5	3	3	3	3	3	3	3.25	1	0.307692	52	52.0_56.0	0.270378	0.595068	Medium variability
OG0000275	3	2	3	2	5	2	3	3	4	3	4	3	3	5	5	2	3.25	1.06458	0.327563	52	52.0_56.0	0.270378	0.595068	Medium variability
OG0000276	5	2	2	2	6	3	4	1	3	2	9	2	2	2	4	3	3.25	2.0166	0.620492	52	52.0_56.0	0.270378	0.595068	High variability
OG0000277	2	2	3	4	2	4	4	2	3	4	5	3	4	5	2	3	3.25	1.06458	0.327563	52	52.0_56.0	0.270378	0.595068	Medium variability
OG0000278	3	2	4	3	2	3	3	2	7	2	4	2	3	5	4	3	3.25	1.34164	0.412813	52	52.0_56.0	0.270378	0.595068	Medium variability
OG0000279	3	3	4	4	4	2	4	4	4	3	3	2	3	3	3	3	3.25	0.68313	0.210194	52	52.0_56.0	0.270378	0.595068	Low variability
OG0000280	3	2	6	5	3	3	3	4	1	2	3	3	3	4	4	3	3.25	1.18322	0.364066	52	52.0_56.0	0.270378	0.595068	Medium variability
OG0000281	2	3	5	2	3	4	2	6	3	3	3	4	1	2	5	4	3.25	1.34164	0.412813	52	52.0_56.0	0.270378	0.595068	Medium variability
OG0000283	3	3	4	2	5	4	4	2	3	4	3	2	2	3	5	2	3.1875	1.04682	0.328414	51	48.0_52.0	0.268502	0.552159	Medium variability
OG0000284	4	3	3	4	4	3	3	2	2	2	6	4	2	2	3	4	3.1875	1.10868	0.347821	51	48.0_52.0	0.268502	0.552159	Medium variability
OG0000285	7	1	4	1	5	3	2	2	1	4	5	3	2	5	1	5	3.1875	1.86971	0.586577	51	48.0_52.0	0.268502	0.552159	High variability
OG0000286	2	3	3	3	2	6	3	1	3	6	5	3	3	5	2	1	3.1875	1.55858	0.488966	51	48.0_52.0	0.268502	0.552159	Medium variability
OG0000287	6	3	2	3	1	0	2	4	4	4	2	5	1	4	4	6	3.1875	1.7595	0.551999	51	48.0_52.0	0.268502	0.552159	Medium variability
OG0000288	5	4	3	3	5	2	2	3	2	3	4	3	2	3	4	3	3.1875	0.981071	0.307787	51	48.0_52.0	0.268502	0.552159	Medium variability
OG0000289	4	2	3	3	4	3	2	2	3	4	5	3	3	3	3	4	3.1875	0.834166	0.261699	51	48.0_52.0	0.268502	0.552159	Low variability
OG0000290	6	3	4	2	5	1	3	2	3	6	8	1	0	4	1	2	3.1875	2.19754	0.689423	51	48.0_52.0	0.268502	0.552159	High variability
OG0000291	3	3	4	1	3	4	1	5	4	4	3	6	2	4	2	2	3.1875	1.37689	0.431966	51	48.0_52.0	0.268502	0.552159	Medium variability
OG0000292	1	5	6	3	2	4	3	2	2	5	2	3	3	3	3	4	3.1875	1.32759	0.416499	51	48.0_52.0	0.268502	0.552159	Medium variability
OG0000293	5	3	4	4	4	5	4	0	3	2	3	3	3	3	3	2	3.1875	1.22304	0.3837	51	48.0_52.0	0.268502	0.552159	Medium variability
OG0000294	2	2	3	2	6	2	2	5	3	4	5	3	4	3	3	2	3.1875	1.27639	0.400435	51	48.0_52.0	0.268502	0.552159	Medium variability
OG0000295	3	4	3	1	3	4	2	7	4	4	6	0	3	2	2	3	3.1875	1.72119	0.539982	51	48.0_52.0	0.268502	0.552159	Medium variability
OG0000296	3	2	3	3	4	4	2	3	4	3	5	2	3	3	3	4	3.1875	0.834166	0.261699	51	48.0_52.0	0.268502	0.552159	Low variability
OG0000297	3	4	3	5	2	5	1	5	2	5	1	2	4	5	2	2	3.1875	1.5152	0.475357	51	48.0_52.0	0.268502	0.552159	Medium variability
OG0000298	4	4	1	3	4	4	2	6	2	2	4	3	2	4	3	3	3.1875	1.22304	0.3837	51	48.0_52.0	0.268502	0.552159	Medium variability
OG0000299	3	3	3	4	2	3	4	5	3	3	3	2	4	3	3	3	3.1875	0.75	0.235294	51	48.0_52.0	0.268502	0.552159	Low variability
OG0000300	3	6	4	2	5	6	2	3	3	3	1	3	1	3	3	3	3.1875	1.47054	0.461347	51	48.0_52.0	0.268502	0.552159	Medium variability
OG0000301	1	3	6	3	1	6	4	4	5	5	4	0	0	4	4	1	3.1875	2.00728	0.629734	51	48.0_52.0	0.268502	0.552159	High variability
OG0000302	1	4	5	1	4	5	3	6	4	6	2	2	2	0	5	1	3.1875	1.93972	0.608539	51	48.0_52.0	0.268502	0.552159	High variability
OG0000303	2	2	4	3	4	4	5	2	4	2	1	3	3	4	5	3	3.1875	1.16726	0.3662	51	48.0_52.0	0.268502	0.552159	Medium variability
OG0000304	1	4	6	4	2	5	3	4	3	3	5	2	1	4	2	2	3.1875	1.47054	0.461347	51	48.0_52.0	0.268502	0.552159	Medium variability
OG0000305	3	3	5	3	2	4	2	1	5	5	4	2	2	4	4	2	3.1875	1.27639	0.400435	51	48.0_52.0	0.268502	0.552159	Medium variability
OG0000306	0	3	5	3	2	3	2	3	4	3	4	3	4	4	4	4	3.1875	1.16726	0.3662	51	48.0_52.0	0.268502	0.552159	Medium variability
OG0000307	0	0	5	5	2	3	2	6	5	3	4	3	1	6	3	3	3.1875	1.90504	0.597659	51	48.0_52.0	0.268502	0.552159	High variability
OG0000308	2	3	3	3	4	4	2	2	4	2	3	4	2	4	3	5	3.125	0.957427	0.306377	50	48.0_52.0	0.268502	0.552159	Medium variability
OG0000309	4	3	3	4	3	3	3	2	2	3	5	4	3	3	3	2	3.125	0.806226	0.257992	50	48.0_52.0	0.268502	0.552159	Low variability
OG0000310	5	2	3	2	5	3	2	2	4	5	1	3	3	4	3	3	3.125	1.20416	0.385331	50	48.0_52.0	0.268502	0.552159	Medium variability
OG0000311	3	2	3	4	3	2	3	4	4	3	6	2	2	4	3	2	3.125	1.08781	0.3481	50	48.0_52.0	0.268502	0.552159	Medium variability
OG0000312	3	2	4	2	3	3	2	3	4	2	5	4	3	4	3	3	3.125	0.885061	0.28322	50	48.0_52.0	0.268502	0.552159	Medium variability
OG0000313	3	2	8	4	5	2	2	2	2	2	4	2	3	2	3	4	3.125	1.62788	0.520922	50	48.0_52.0	0.268502	0.552159	Medium variability
OG0000314	5	2	1	1	5	3	2	1	4	2	6	3	4	4	3	4	3.125	1.5438	0.494018	50	48.0_52.0	0.268502	0.552159	Medium variability
OG0000315	5	3	3	3	5	2	3	3	3	3	4	2	2	3	3	3	3.125	0.885061	0.28322	50	48.0_52.0	0.268502	0.552159	Medium variability
OG0000316	2	4	2	3	6	2	3	4	3	3	7	2	1	2	4	2	3.125	1.5864	0.507648	50	48.0_52.0	0.268502	0.552159	Medium variability
OG0000317	3	4	5	2	10	4	3	3	4	0	2	0	3	5	1	1	3.125	2.41868	0.773977	50	48.0_52.0	0.268502	0.552159	High variability
OG0000318	4	4	3	3	3	4	3	3	2	3	3	4	2	3	3	3	3.125	0.619139	0.198125	50	48.0_52.0	0.268502	0.552159	Low variability
OG0000319	3	3	4	2	3	3	3	4	4	2	5	3	1	5	3	2	3.125	1.08781	0.3481	50	48.0_52.0	0.268502	0.552159	Medium variability
OG0000320	3	3	6	2	4	2	2	2	2	5	4	4	2	3	3	3	3.125	1.20416	0.385331	50	48.0_52.0	0.268502	0.552159	Medium variability
OG0000321	3	4	3	3	3	3	3	3	3	3	5	3	3	2	3	3	3.125	0.619139	0.198125	50	48.0_52.0	0.268502	0.552159	Low variability
OG0000322	4	2	4	3	3	3	3	5	2	2	1	5	2	3	4	4	3.125	1.14746	0.367188	50	48.0_52.0	0.268502	0.552159	Medium variability
OG0000323	5	2	2	4	2	2	3	4	2	1	6	3	4	3	4	3	3.125	1.31022	0.419269	50	48.0_52.0	0.268502	0.552159	Medium variability
OG0000324	3	5	2	3	3	2	2	2	3	3	3	4	5	3	4	3	3.125	0.957427	0.306377	50	48.0_52.0	0.268502	0.552159	Medium variability
OG0000325	4	3	4	5	3	2	2	2	3	2	3	4	3	4	3	3	3.125	0.885061	0.28322	50	48.0_52.0	0.268502	0.552159	Medium variability
OG0000326	3	4	3	3	3	3	2	4	3	2	3	3	4	3	4	3	3.125	0.619139	0.198125	50	48.0_52.0	0.268502	0.552159	Low variability
OG0000327	0	0	3	0	0	0	0	45	0	2	0	0	0	0	0	0	3.125	11.2004	3.58414	50	48.0_52.0	0.268502	0.552159	High variability
OG0000329	9	2	3	2	3	3	2	3	3	2	6	2	2	3	1	3	3.0625	1.91377	0.624903	49	48.0_52.0	0.268502	0.552159	High variability
OG0000330	4	1	4	3	4	4	2	2	3	4	2	3	3	4	3	3	3.0625	0.928709	0.303252	49	48.0_52.0	0.268502	0.552159	Medium variability
OG0000331	4	2	3	1	7	2	1	7	2	4	6	1	2	2	2	3	3.0625	2.01556	0.658143	49	48.0_52.0	0.268502	0.552159	High variability
OG0000332	2	3	3	4	3	3	3	4	2	3	3	3	3	4	3	3	3.0625	0.57373	0.187341	49	48.0_52.0	0.268502	0.552159	Low variability
OG0000333	4	2	2	3	4	3	3	2	3	3	4	5	3	2	4	2	3.0625	0.928709	0.303252	49	48.0_52.0	0.268502	0.552159	Medium variability
OG0000334	2	5	3	2	3	2	2	2	2	3	4	4	2	3	4	6	3.0625	1.23659	0.403786	49	48.0_52.0	0.268502	0.552159	Medium variability
OG0000335	4	2	3	4	2	2	3	2	3	3	2	3	2	5	6	3	3.0625	1.18145	0.385781	49	48.0_52.0	0.268502	0.552159	Medium variability
OG0000336	3	1	4	4	5	5	2	1	3	3	3	4	3	3	3	2	3.0625	1.18145	0.385781	49	48.0_52.0	0.268502	0.552159	Medium variability
OG0000337	3	5	4	4	6	3	2	2	2	3	4	3	1	0	2	5	3.0625	1.56924	0.512403	49	48.0_52.0	0.268502	0.552159	Medium variability
OG0000338	8	2	3	1	3	3	1	4	2	3	3	2	2	4	3	5	3.0625	1.69189	0.552455	49	48.0_52.0	0.268502	0.552159	High variability
OG0000339	2	0	4	3	3	3	6	0	4	4	5	4	3	3	5	0	3.0625	1.80624	0.589792	49	48.0_52.0	0.268502	0.552159	High variability
OG0000340	5	2	5	4	3	3	2	5	3	3	3	2	3	2	3	1	3.0625	1.18145	0.385781	49	48.0_52.0	0.268502	0.552159	Medium variability
OG0000341	4	3	3	4	4	4	3	4	3	1	4	2	2	4	3	1	3.0625	1.06262	0.346979	49	48.0_52.0	0.268502	0.552159	Medium variability
OG0000342	3	2	3	2	4	3	2	3	3	3	4	4	3	5	3	2	3.0625	0.853913	0.278829	49	48.0_52.0	0.268502	0.552159	Medium variability
OG0000343	2	2	4	3	5	3	2	2	4	3	4	3	2	2	5	3	3.0625	1.06262	0.346979	49	48.0_52.0	0.268502	0.552159	Medium variability
OG0000344	2	3	2	2	4	2	1	4	4	2	4	4	5	2	5	3	3.0625	1.23659	0.403786	49	48.0_52.0	0.268502	0.552159	Medium variability
OG0000345	2	3	3	3	5	3	2	5	5	3	4	1	2	3	2	3	3.0625	1.18145	0.385781	49	48.0_52.0	0.268502	0.552159	Medium variability
OG0000346	5	1	4	2	3	3	4	5	2	3	3	3	2	1	2	6	3.0625	1.43614	0.468944	49	48.0_52.0	0.268502	0.552159	Medium variability
OG0000347	3	3	3	3	4	3	3	3	3	3	3	3	3	3	3	3	3.0625	0.25	0.0816327	49	48.0_52.0	0.268502	0.552159	Low variability
OG0000348	1	3	3	3	3	3	2	4	2	4	3	4	3	3	5	3	3.0625	0.928709	0.303252	49	48.0_52.0	0.268502	0.552159	Medium variability
OG0000349	2	2	4	3	4	4	3	4	3	3	4	2	3	3	3	2	3.0625	0.771902	0.25205	49	48.0_52.0	0.268502	0.552159	Low variability
OG0000350	2	3	5	3	3	2	3	5	2	3	2	4	2	4	3	3	3.0625	0.997914	0.32585	49	48.0_52.0	0.268502	0.552159	Medium variability
OG0000351	3	3	4	4	4	2	5	1	5	4	2	3	1	2	1	5	3.0625	1.43614	0.468944	49	48.0_52.0	0.268502	0.552159	Medium variability
OG0000352	3	3	3	2	3	3	3	3	3	3	3	4	2	3	3	4	3	0.516398	0.172133	48	48.0_52.0	0.268502	0.552159	Low variability
OG0000353	2	2	3	1	5	2	4	3	0	2	7	3	4	6	1	3	3	1.8619	0.620633	48	48.0_52.0	0.268502	0.552159	High variability
OG0000354	3	3	2	4	3	2	4	2	4	3	3	4	4	1	3	3	3	0.894427	0.298142	48	48.0_52.0	0.268502	0.552159	Medium variability
OG0000355	3	0	2	4	5	2	3	0	3	3	5	1	3	4	7	3	3	1.82574	0.608581	48	48.0_52.0	0.268502	0.552159	High variability
OG0000356	2	3	2	4	4	3	3	3	4	2	2	3	4	3	3	3	3	0.730297	0.243432	48	48.0_52.0	0.268502	0.552159	Low variability
OG0000357	1	1	5	3	3	4	2	3	3	2	5	3	3	2	3	5	3	1.26491	0.421637	48	48.0_52.0	0.268502	0.552159	Medium variability
OG0000358	4	3	6	4	4	4	2	2	1	3	2	3	1	3	4	2	3	1.31656	0.438854	48	48.0_52.0	0.268502	0.552159	Medium variability
OG0000359	3	2	3	3	2	4	2	4	5	3	2	2	4	4	3	2	3	0.966092	0.322031	48	48.0_52.0	0.268502	0.552159	Medium variability
OG0000360	2	1	2	3	3	2	2	3	2	4	4	4	2	5	6	3	3	1.31656	0.438854	48	48.0_52.0	0.268502	0.552159	Medium variability
OG0000361	3	5	4	3	2	3	2	1	2	2	4	4	4	2	4	3	3	1.09545	0.365148	48	48.0_52.0	0.268502	0.552159	Medium variability
OG0000362	3	4	2	3	3	2	4	3	3	3	3	4	2	3	3	3	3	0.632456	0.210819	48	48.0_52.0	0.268502	0.552159	Low variability
OG0000363	2	2	4	3	2	4	2	2	5	3	5	2	3	4	3	2	3	1.09545	0.365148	48	48.0_52.0	0.268502	0.552159	Medium variability
OG0000364	2	4	3	3	2	0	2	1	4	3	4	4	5	4	4	3	3	1.31656	0.438854	48	48.0_52.0	0.268502	0.552159	Medium variability
OG0000365	4	2	3	3	4	2	2	3	2	3	4	2	6	2	4	2	3	1.1547	0.3849	48	48.0_52.0	0.268502	0.552159	Medium variability
OG0000366	2	4	1	3	3	3	4	3	3	2	2	4	4	3	4	3	3	0.894427	0.298142	48	48.0_52.0	0.268502	0.552159	Medium variability
OG0000367	5	2	2	4	3	3	3	3	3	3	2	3	3	3	3	3	3	0.730297	0.243432	48	48.0_52.0	0.268502	0.552159	Low variability
OG0000368	2	3	3	3	3	2	3	3	5	2	6	1	5	3	3	1	3	1.36626	0.45542	48	48.0_52.0	0.268502	0.552159	Medium variability
OG0000369	4	3	2	4	3	1	3	4	3	3	3	4	3	1	4	3	3	0.966092	0.322031	48	48.0_52.0	0.268502	0.552159	Medium variability
OG0000370	3	2	2	4	4	3	1	4	3	3	4	3	3	3	3	3	3	0.816497	0.272166	48	48.0_52.0	0.268502	0.552159	Medium variability
OG0000371	3	3	6	1	4	1	8	1	5	1	5	1	3	1	1	4	3	2.19089	0.730297	48	48.0_52.0	0.268502	0.552159	High variability
OG0000372	2	1	3	3	5	2	4	1	3	2	4	4	3	4	3	4	3	1.1547	0.3849	48	48.0_52.0	0.268502	0.552159	Medium variability
OG0000373	2	2	2	2	3	3	4	4	3	2	4	3	4	5	2	3	3	0.966092	0.322031	48	48.0_52.0	0.268502	0.552159	Medium variability
OG0000374	3	3	3	3	4	3	1	2	4	2	5	5	2	3	3	2	3	1.09545	0.365148	48	48.0_52.0	0.268502	0.552159	Medium variability
OG0000375	1	2	2	5	2	4	2	2	4	3	4	2	3	5	4	3	3	1.21106	0.403687	48	48.0_52.0	0.268502	0.552159	Medium variability
OG0000376	8	3	2	2	3	4	3	1	4	1	5	0	4	2	3	2	2.9375	1.87861	0.639526	47	44.0_48.0	0.281049	0.631644	High variability
OG0000377	5	3	4	3	2	4	2	3	4	4	3	2	2	3	2	1	2.9375	1.06262	0.361744	47	44.0_48.0	0.281049	0.631644	Medium variability
OG0000378	5	5	3	2	2	2	4	3	2	3	2	3	3	3	2	3	2.9375	0.997914	0.339716	47	44.0_48.0	0.281049	0.631644	Medium variability
OG0000379	4	2	3	3	4	2	4	2	3	3	3	1	3	3	4	3	2.9375	0.853913	0.290694	47	44.0_48.0	0.281049	0.631644	Medium variability
OG0000380	2	3	7	3	4	2	2	4	3	3	1	3	2	1	3	4	2.9375	1.43614	0.488899	47	44.0_48.0	0.281049	0.631644	Medium variability
OG0000381	7	2	11	0	5	0	2	0	1	2	8	0	2	4	1	2	2.9375	3.25512	1.10813	47	44.0_48.0	0.281049	0.631644	High variability
OG0000382	5	2	1	4	4	3	1	2	2	3	6	4	3	3	2	2	2.9375	1.38894	0.472832	47	44.0_48.0	0.281049	0.631644	Medium variability
OG0000383	8	1	5	3	5	2	3	1	2	2	5	1	1	3	3	2	2.9375	1.94829	0.663248	47	44.0_48.0	0.281049	0.631644	High variability
OG0000384	5	2	3	3	4	2	3	4	2	4	3	2	2	3	3	2	2.9375	0.928709	0.316156	47	44.0_48.0	0.281049	0.631644	Medium variability
OG0000385	4	4	3	1	2	2	5	1	5	2	4	4	2	2	3	3	2.9375	1.28938	0.438938	47	44.0_48.0	0.281049	0.631644	Medium variability
OG0000386	3	3	5	3	2	6	2	3	3	2	2	3	0	4	2	4	2.9375	1.38894	0.472832	47	44.0_48.0	0.281049	0.631644	Medium variability
OG0000387	4	4	3	2	3	1	3	3	4	2	3	3	3	3	3	3	2.9375	0.771902	0.262775	47	44.0_48.0	0.281049	0.631644	Low variability
OG0000388	3	3	2	3	3	3	4	3	3	3	2	4	2	3	3	3	2.9375	0.57373	0.195313	47	44.0_48.0	0.281049	0.631644	Low variability
OG0000389	3	2	4	3	3	2	2	3	2	3	3	4	4	2	4	3	2.9375	0.771902	0.262775	47	44.0_48.0	0.281049	0.631644	Low variability
OG0000390	2	2	2	3	3	3	4	2	3	3	3	3	3	2	4	5	2.9375	0.853913	0.290694	47	44.0_48.0	0.281049	0.631644	Medium variability
OG0000391	3	5	1	1	2	4	3	4	2	3	3	3	5	3	3	2	2.9375	1.18145	0.402197	47	44.0_48.0	0.281049	0.631644	Medium variability
OG0000392	3	3	3	3	3	2	2	3	3	3	4	2	3	3	4	3	2.9375	0.57373	0.195313	47	44.0_48.0	0.281049	0.631644	Low variability
OG0000393	2	2	4	4	3	2	2	2	4	4	3	4	3	3	2	3	2.9375	0.853913	0.290694	47	44.0_48.0	0.281049	0.631644	Medium variability
OG0000394	3	2	2	3	3	3	3	3	3	4	2	3	3	3	3	4	2.9375	0.57373	0.195313	47	44.0_48.0	0.281049	0.631644	Low variability
OG0000395	1	1	2	5	5	1	0	0	4	6	6	2	2	7	3	2	2.9375	2.26477	0.770984	47	44.0_48.0	0.281049	0.631644	High variability
OG0000396	2	6	4	2	4	6	2	2	3	2	1	3	2	3	3	2	2.9375	1.43614	0.488899	47	44.0_48.0	0.281049	0.631644	Medium variability
OG0000397	0	4	7	2	2	1	4	3	1	2	4	1	1	5	2	8	2.9375	2.26477	0.770984	47	44.0_48.0	0.281049	0.631644	High variability
OG0000398	3	3	2	2	3	3	3	2	2	3	4	3	2	4	5	2	2.875	0.885061	0.307847	46	44.0_48.0	0.281049	0.631644	Medium variability
OG0000399	6	2	3	2	7	3	2	1	2	2	7	2	3	1	0	3	2.875	2.06155	0.717062	46	44.0_48.0	0.281049	0.631644	High variability
OG0000400	4	1	2	3	2	4	2	2	5	4	5	2	1	4	2	3	2.875	1.31022	0.455727	46	44.0_48.0	0.281049	0.631644	Medium variability
OG0000401	2	2	4	3	3	2	3	3	3	3	3	3	3	2	4	3	2.875	0.619139	0.215353	46	44.0_48.0	0.281049	0.631644	Low variability
OG0000402	2	4	5	3	3	2	3	2	2	2	3	4	2	2	2	5	2.875	1.08781	0.378369	46	44.0_48.0	0.281049	0.631644	Medium variability
OG0000403	3	4	4	6	4	2	2	0	2	3	4	2	3	2	1	4	2.875	1.45488	0.506044	46	44.0_48.0	0.281049	0.631644	Medium variability
OG0000404	3	5	2	3	3	2	2	2	4	1	3	3	1	4	6	2	2.875	1.36015	0.473095	46	44.0_48.0	0.281049	0.631644	Medium variability
OG0000405	5	1	5	3	3	2	1	2	3	3	3	3	3	3	3	3	2.875	1.08781	0.378369	46	44.0_48.0	0.281049	0.631644	Medium variability
OG0000406	3	3	6	1	2	5	2	5	4	1	4	1	2	1	3	3	2.875	1.5864	0.551791	46	44.0_48.0	0.281049	0.631644	Medium variability
OG0000407	3	2	3	3	4	3	2	0	2	3	4	4	2	2	3	6	2.875	1.31022	0.455727	46	44.0_48.0	0.281049	0.631644	Medium variability
OG0000408	4	3	3	2	2	2	2	3	2	3	3	4	4	3	4	2	2.875	0.806226	0.280426	46	44.0_48.0	0.281049	0.631644	Low variability
OG0000409	3	5	2	5	2	3	2	2	2	2	3	4	3	3	2	3	2.875	1.0247	0.356416	46	44.0_48.0	0.281049	0.631644	Medium variability
OG0000410	4	3	4	2	3	2	5	3	3	2	2	3	4	2	2	2	2.875	0.957427	0.333018	46	44.0_48.0	0.281049	0.631644	Medium variability
OG0000411	3	4	4	4	3	4	1	1	1	5	3	3	2	2	3	3	2.875	1.20416	0.418838	46	44.0_48.0	0.281049	0.631644	Medium variability
OG0000412	2	2	3	2	3	4	4	2	3	2	3	5	4	1	2	4	2.875	1.08781	0.378369	46	44.0_48.0	0.281049	0.631644	Medium variability
OG0000413	2	2	4	4	2	3	2	2	3	3	3	3	4	3	3	3	2.875	0.718795	0.250016	46	44.0_48.0	0.281049	0.631644	Low variability
OG0000414	3	4	4	4	2	1	3	4	2	4	2	2	2	3	3	3	2.875	0.957427	0.333018	46	44.0_48.0	0.281049	0.631644	Medium variability
OG0000415	6	4	1	1	3	2	3	3	1	3	6	2	1	3	2	5	2.875	1.66833	0.58029	46	44.0_48.0	0.281049	0.631644	Medium variability
OG0000416	1	4	2	2	3	3	4	3	3	3	3	4	4	2	2	3	2.875	0.885061	0.307847	46	44.0_48.0	0.281049	0.631644	Medium variability
OG0000417	4	2	3	4	3	2	2	3	4	1	2	3	2	3	5	3	2.875	1.0247	0.356416	46	44.0_48.0	0.281049	0.631644	Medium variability
OG0000418	4	3	3	4	3	3	3	3	4	2	4	3	2	1	3	1	2.875	0.957427	0.333018	46	44.0_48.0	0.281049	0.631644	Medium variability
OG0000419	1	2	5	2	3	1	1	11	4	3	1	3	3	2	3	1	2.875	2.47319	0.86024	46	44.0_48.0	0.281049	0.631644	High variability
OG0000420	4	3	3	3	3	3	2	2	3	3	3	3	2	3	3	3	2.875	0.5	0.173913	46	44.0_48.0	0.281049	0.631644	Low variability
OG0000421	2	4	1	3	3	1	3	3	3	3	4	4	3	4	4	1	2.875	1.08781	0.378369	46	44.0_48.0	0.281049	0.631644	Medium variability
OG0000422	3	1	3	1	4	4	5	1	3	1	4	4	2	4	3	3	2.875	1.31022	0.455727	46	44.0_48.0	0.281049	0.631644	Medium variability
OG0000423	4	2	4	3	4	3	5	1	1	4	4	2	2	4	1	2	2.875	1.31022	0.455727	46	44.0_48.0	0.281049	0.631644	Medium variability
OG0000424	4	5	3	3	2	3	3	1	3	2	2	3	3	3	3	3	2.875	0.885061	0.307847	46	44.0_48.0	0.281049	0.631644	Medium variability
OG0000425	1	2	6	3	3	5	0	1	2	8	3	3	0	4	4	1	2.875	2.18708	0.760725	46	44.0_48.0	0.281049	0.631644	High variability
OG0000426	3	3	3	2	4	3	3	3	2	3	2	3	4	2	3	3	2.875	0.619139	0.215353	46	44.0_48.0	0.281049	0.631644	Low variability
OG0000427	3	3	3	3	3	2	3	4	1	3	4	3	2	3	3	3	2.875	0.718795	0.250016	46	44.0_48.0	0.281049	0.631644	Low variability
OG0000428	2	2	5	3	3	2	2	7	2	3	2	3	2	3	2	3	2.875	1.36015	0.473095	46	44.0_48.0	0.281049	0.631644	Medium variability
OG0000429	2	4	3	4	3	2	6	2	3	2	2	3	2	3	2	3	2.875	1.08781	0.378369	46	44.0_48.0	0.281049	0.631644	Medium variability
OG0000430	4	3	3	3	5	3	2	2	2	4	4	3	3	2	2	1	2.875	1.0247	0.356416	46	44.0_48.0	0.281049	0.631644	Medium variability
OG0000431	3	2	4	3	3	2	2	3	3	4	2	3	3	3	4	2	2.875	0.718795	0.250016	46	44.0_48.0	0.281049	0.631644	Low variability
OG0000432	2	2	4	4	3	3	2	2	5	4	3	2	2	5	2	1	2.875	1.20416	0.418838	46	44.0_48.0	0.281049	0.631644	Medium variability
OG0000433	2	4	2	3	3	2	4	2	3	3	3	4	3	3	3	2	2.875	0.718795	0.250016	46	44.0_48.0	0.281049	0.631644	Low variability
OG0000434	3	3	3	2	3	3	3	3	3	2	2	3	5	2	3	3	2.875	0.718795	0.250016	46	44.0_48.0	0.281049	0.631644	Low variability
OG0000435	3	4	6	3	6	4	1	1	2	1	2	4	0	4	1	4	2.875	1.82117	0.633451	46	44.0_48.0	0.281049	0.631644	High variability
OG0000436	0	1	6	3	2	2	1	8	2	4	1	2	5	4	3	2	2.875	2.09364	0.728223	46	44.0_48.0	0.281049	0.631644	High variability
OG0000437	3	2	3	2	3	3	2	3	2	3	2	4	3	3	3	4	2.8125	0.655108	0.232927	45	44.0_48.0	0.281049	0.631644	Low variability
OG0000438	3	2	3	1	4	2	4	4	3	1	6	2	1	5	3	1	2.8125	1.5152	0.538738	45	44.0_48.0	0.281049	0.631644	Medium variability
OG0000439	6	7	6	1	4	1	3	2	1	1	3	3	1	0	0	6	2.8125	2.34432	0.833536	45	44.0_48.0	0.281049	0.631644	High variability
OG0000440	3	1	4	3	3	3	3	3	3	4	3	3	0	5	2	2	2.8125	1.16726	0.415026	45	44.0_48.0	0.281049	0.631644	Medium variability
OG0000441	4	2	2	3	3	2	2	2	2	3	3	4	3	4	2	4	2.8125	0.834166	0.296592	45	44.0_48.0	0.281049	0.631644	Medium variability
OG0000442	2	1	5	5	4	3	1	4	1	2	4	2	3	2	2	4	2.8125	1.37689	0.489562	45	44.0_48.0	0.281049	0.631644	Medium variability
OG0000443	3	4	3	3	2	2	2	3	3	4	1	3	4	3	3	2	2.8125	0.834166	0.296592	45	44.0_48.0	0.281049	0.631644	Medium variability
OG0000444	6	4	5	3	2	3	2	2	2	2	2	2	3	3	2	2	2.8125	1.22304	0.43486	45	44.0_48.0	0.281049	0.631644	Medium variability
OG0000445	4	1	3	3	2	3	4	2	2	3	3	4	2	3	3	3	2.8125	0.834166	0.296592	45	44.0_48.0	0.281049	0.631644	Medium variability
OG0000446	4	4	2	2	4	2	2	2	3	2	3	4	2	2	3	4	2.8125	0.910586	0.323764	45	44.0_48.0	0.281049	0.631644	Medium variability
OG0000447	3	4	2	3	3	3	2	3	4	2	2	3	2	3	3	3	2.8125	0.655108	0.232927	45	44.0_48.0	0.281049	0.631644	Low variability
OG0000448	1	1	7	4	4	3	3	9	4	2	2	1	2	2	0	0	2.8125	2.42813	0.863336	45	44.0_48.0	0.281049	0.631644	High variability
OG0000449	5	2	4	4	2	1	3	2	2	3	4	2	3	3	3	2	2.8125	1.04682	0.372203	45	44.0_48.0	0.281049	0.631644	Medium variability
OG0000450	3	2	2	2	5	2	2	2	4	3	2	5	3	3	2	3	2.8125	1.04682	0.372203	45	44.0_48.0	0.281049	0.631644	Medium variability
OG0000451	3	4	3	4	2	4	2	1	3	3	4	4	2	2	3	1	2.8125	1.04682	0.372203	45	44.0_48.0	0.281049	0.631644	Medium variability
OG0000452	3	2	3	4	4	5	3	1	3	1	4	3	2	5	1	1	2.8125	1.37689	0.489562	45	44.0_48.0	0.281049	0.631644	Medium variability
OG0000453	3	4	6	2	2	4	1	4	4	3	1	2	0	3	3	3	2.8125	1.47054	0.52286	45	44.0_48.0	0.281049	0.631644	Medium variability
OG0000454	3	3	2	3	4	3	3	3	3	1	2	5	2	3	3	2	2.8125	0.910586	0.323764	45	44.0_48.0	0.281049	0.631644	Medium variability
OG0000455	3	3	3	4	2	4	5	3	2	3	3	2	4	1	2	1	2.8125	1.10868	0.394197	45	44.0_48.0	0.281049	0.631644	Medium variability
OG0000456	4	2	3	4	2	2	5	2	2	4	2	2	4	3	3	1	2.8125	1.10868	0.394197	45	44.0_48.0	0.281049	0.631644	Medium variability
OG0000457	2	2	4	3	3	3	2	4	2	2	2	4	3	3	4	2	2.8125	0.834166	0.296592	45	44.0_48.0	0.281049	0.631644	Medium variability
OG0000458	1	2	4	2	0	4	3	2	4	3	5	1	4	5	4	1	2.8125	1.55858	0.554161	45	44.0_48.0	0.281049	0.631644	Medium variability
OG0000459	3	3	3	2	3	3	3	3	1	2	3	2	2	5	4	3	2.8125	0.910586	0.323764	45	44.0_48.0	0.281049	0.631644	Medium variability
OG0000460	1	3	4	3	3	3	3	2	2	2	1	4	2	4	4	4	2.8125	1.04682	0.372203	45	44.0_48.0	0.281049	0.631644	Medium variability
OG0000461	2	2	5	4	2	3	4	2	2	3	2	2	3	3	3	3	2.8125	0.910586	0.323764	45	44.0_48.0	0.281049	0.631644	Medium variability
OG0000462	1	1	6	4	3	5	2	2	1	5	5	3	2	2	1	2	2.8125	1.68201	0.598049	45	44.0_48.0	0.281049	0.631644	Medium variability
OG0000463	3	2	1	4	4	3	4	1	3	1	2	3	4	4	4	2	2.8125	1.16726	0.415026	45	44.0_48.0	0.281049	0.631644	Medium variability
OG0000464	2	1	7	3	1	3	2	5	3	5	3	3	2	1	1	3	2.8125	1.68201	0.598049	45	44.0_48.0	0.281049	0.631644	Medium variability
OG0000465	1	2	6	2	4	1	4	2	1	1	7	4	4	3	1	2	2.8125	1.86971	0.664787	45	44.0_48.0	0.281049	0.631644	High variability
OG0000466	2	4	3	3	2	3	2	1	3	3	2	3	4	3	4	3	2.8125	0.834166	0.296592	45	44.0_48.0	0.281049	0.631644	Medium variability
OG0000467	0	2	3	3	5	1	3	3	2	1	6	2	2	4	7	1	2.8125	1.90504	0.677347	45	44.0_48.0	0.281049	0.631644	High variability
OG0000468	0	0	4	11	2	3	3	3	1	4	1	2	4	3	3	1	2.8125	2.56174	0.91084	45	44.0_48.0	0.281049	0.631644	High variability
OG0000469	2	3	4	3	3	2	3	2	3	1	2	3	4	3	2	4	2.75	0.856349	0.3114	44	44.0_48.0	0.281049	0.631644	Medium variability
OG0000470	3	3	3	3	2	3	3	2	2	4	4	2	1	3	3	3	2.75	0.774597	0.281672	44	44.0_48.0	0.281049	0.631644	Medium variability
OG0000471	2	2	3	1	3	3	3	1	2	3	4	2	4	4	3	4	2.75	1	0.363636	44	44.0_48.0	0.281049	0.631644	Medium variability
OG0000472	4	4	3	2	2	2	3	4	3	3	3	3	1	3	2	2	2.75	0.856349	0.3114	44	44.0_48.0	0.281049	0.631644	Medium variability
OG0000473	4	2	2	4	4	2	1	2	3	3	4	4	3	3	1	2	2.75	1.06458	0.38712	44	44.0_48.0	0.281049	0.631644	Medium variability
OG0000474	5	2	1	2	4	4	2	4	4	1	3	2	3	2	2	3	2.75	1.18322	0.43026	44	44.0_48.0	0.281049	0.631644	Medium variability
OG0000475	3	3	3	2	4	2	2	1	4	2	2	3	3	3	3	4	2.75	0.856349	0.3114	44	44.0_48.0	0.281049	0.631644	Medium variability
OG0000476	5	2	2	3	2	2	2	2	3	3	3	3	4	2	3	3	2.75	0.856349	0.3114	44	44.0_48.0	0.281049	0.631644	Medium variability
OG0000477	3	2	1	3	3	2	3	2	4	2	2	2	2	6	5	2	2.75	1.29099	0.469453	44	44.0_48.0	0.281049	0.631644	Medium variability
OG0000478	2	1	3	3	2	3	3	1	4	4	3	3	3	4	4	1	2.75	1.06458	0.38712	44	44.0_48.0	0.281049	0.631644	Medium variability
OG0000479	2	3	3	3	4	3	2	3	3	2	2	3	3	3	3	2	2.75	0.57735	0.209946	44	44.0_48.0	0.281049	0.631644	Low variability
OG0000480	4	3	3	2	7	2	3	1	1	4	3	1	3	3	2	2	2.75	1.48324	0.53936	44	44.0_48.0	0.281049	0.631644	Medium variability
OG0000481	5	2	3	5	2	3	1	1	2	6	6	2	1	1	2	2	2.75	1.77012	0.643681	44	44.0_48.0	0.281049	0.631644	High variability
OG0000482	4	2	3	1	3	1	4	4	4	4	4	3	0	2	1	4	2.75	1.39044	0.505616	44	44.0_48.0	0.281049	0.631644	Medium variability
OG0000483	4	1	4	2	3	5	2	2	3	4	2	3	2	2	2	3	2.75	1.06458	0.38712	44	44.0_48.0	0.281049	0.631644	Medium variability
OG0000484	3	4	2	3	4	2	2	3	3	3	2	3	1	2	4	3	2.75	0.856349	0.3114	44	44.0_48.0	0.281049	0.631644	Medium variability
OG0000485	5	1	2	1	6	5	3	1	2	1	5	3	2	4	2	1	2.75	1.73205	0.629837	44	44.0_48.0	0.281049	0.631644	Medium variability
OG0000486	3	1	0	3	4	2	4	2	3	5	3	3	4	3	3	1	2.75	1.29099	0.469453	44	44.0_48.0	0.281049	0.631644	Medium variability
OG0000487	3	3	2	2	3	3	4	1	2	3	3	4	5	1	2	3	2.75	1.06458	0.38712	44	44.0_48.0	0.281049	0.631644	Medium variability
OG0000488	4	1	3	0	0	0	4	3	9	3	6	2	0	7	1	1	2.75	2.72029	0.989198	44	44.0_48.0	0.281049	0.631644	High variability
OG0000489	4	2	3	0	5	3	2	3	0	4	4	2	2	2	4	4	2.75	1.43759	0.52276	44	44.0_48.0	0.281049	0.631644	Medium variability
OG0000490	3	2	2	3	4	3	3	2	4	2	2	3	2	3	3	3	2.75	0.68313	0.248411	44	44.0_48.0	0.281049	0.631644	Low variability
OG0000491	5	5	2	0	3	4	2	5	1	1	1	2	8	0	3	2	2.75	2.17562	0.791135	44	44.0_48.0	0.281049	0.631644	High variability
OG0000492	4	3	2	1	3	5	2	2	4	3	3	1	5	2	2	2	2.75	1.23828	0.450283	44	44.0_48.0	0.281049	0.631644	Medium variability
OG0000493	3	3	5	3	3	4	2	2	2	2	2	2	2	3	3	3	2.75	0.856349	0.3114	44	44.0_48.0	0.281049	0.631644	Medium variability
OG0000494	3	3	2	3	3	4	1	3	2	2	4	3	2	3	4	2	2.75	0.856349	0.3114	44	44.0_48.0	0.281049	0.631644	Medium variability
OG0000495	4	2	2	2	5	3	3	2	2	3	3	2	3	2	3	3	2.75	0.856349	0.3114	44	44.0_48.0	0.281049	0.631644	Medium variability
OG0000496	1	1	5	5	3	3	4	1	1	3	6	1	1	6	3	0	2.75	1.98326	0.721187	44	44.0_48.0	0.281049	0.631644	High variability
OG0000497	4	1	5	4	5	2	2	0	1	4	4	4	1	5	0	2	2.75	1.80739	0.657234	44	44.0_48.0	0.281049	0.631644	High variability
OG0000498	4	2	4	3	3	1	3	3	3	2	3	4	2	3	2	2	2.75	0.856349	0.3114	44	44.0_48.0	0.281049	0.631644	Medium variability
OG0000499	3	5	5	1	3	2	2	2	2	2	4	3	1	3	3	3	2.75	1.18322	0.43026	44	44.0_48.0	0.281049	0.631644	Medium variability
OG0000500	3	2	1	1	6	3	1	2	1	3	6	2	2	4	3	4	2.75	1.61245	0.586346	44	44.0_48.0	0.281049	0.631644	Medium variability
OG0000501	2	3	2	3	3	4	2	3	2	5	2	3	2	3	4	1	2.75	1	0.363636	44	44.0_48.0	0.281049	0.631644	Medium variability
OG0000502	3	3	6	5	2	2	3	3	3	3	2	1	1	1	3	3	2.75	1.34164	0.487869	44	44.0_48.0	0.281049	0.631644	Medium variability
OG0000503	2	2	3	3	4	2	2	3	2	3	4	3	2	3	3	3	2.75	0.68313	0.248411	44	44.0_48.0	0.281049	0.631644	Low variability
OG0000504	2	2	2	3	3	1	4	4	3	2	3	4	3	5	2	1	2.75	1.12546	0.409259	44	44.0_48.0	0.281049	0.631644	Medium variability
OG0000505	3	3	4	2	2	1	2	2	3	2	3	4	4	2	5	2	2.75	1.06458	0.38712	44	44.0_48.0	0.281049	0.631644	Medium variability
OG0000506	3	2	2	3	3	3	3	3	3	3	3	3	3	3	3	1	2.75	0.57735	0.209946	44	44.0_48.0	0.281049	0.631644	Low variability
OG0000507	4	2	2	2	4	3	3	2	3	3	4	2	2	2	3	2	2.6875	0.7932	0.295144	43	40.0_44.0	0.285938	0.583223	Medium variability
OG0000508	4	2	3	2	3	3	3	3	3	2	3	2	3	3	2	2	2.6875	0.60208	0.22403	43	40.0_44.0	0.285938	0.583223	Low variability
OG0000509	3	3	2	3	3	3	3	2	3	3	2	4	3	1	3	2	2.6875	0.704154	0.262011	43	40.0_44.0	0.285938	0.583223	Low variability
OG0000510	3	2	3	2	5	1	2	3	3	2	4	3	1	3	3	3	2.6875	1.01448	0.37748	43	40.0_44.0	0.285938	0.583223	Medium variability
OG0000511	3	3	3	3	3	3	2	1	3	2	3	3	3	4	2	2	2.6875	0.704154	0.262011	43	40.0_44.0	0.285938	0.583223	Low variability
OG0000512	4	0	7	0	0	1	0	18	0	7	0	1	0	0	0	5	2.6875	4.82658	1.79594	43	40.0_44.0	0.285938	0.583223	High variability
OG0000513	4	2	4	2	3	3	3	4	3	2	3	3	3	2	1	1	2.6875	0.946485	0.35218	43	40.0_44.0	0.285938	0.583223	Medium variability
OG0000514	2	3	2	3	2	3	3	1	3	2	3	4	2	3	3	4	2.6875	0.7932	0.295144	43	40.0_44.0	0.285938	0.583223	Medium variability
OG0000515	4	1	4	3	3	3	4	3	2	3	2	2	2	2	3	2	2.6875	0.873212	0.324916	43	40.0_44.0	0.285938	0.583223	Medium variability
OG0000516	3	2	2	2	5	2	2	4	2	2	4	2	2	3	2	4	2.6875	1.01448	0.37748	43	40.0_44.0	0.285938	0.583223	Medium variability
OG0000517	4	1	2	3	3	4	3	0	3	3	3	3	3	3	4	1	2.6875	1.13835	0.423571	43	40.0_44.0	0.285938	0.583223	Medium variability
OG0000518	8	1	4	4	2	1	1	3	1	1	4	3	2	5	2	1	2.6875	1.95683	0.728121	43	40.0_44.0	0.285938	0.583223	High variability
OG0000519	4	2	3	1	3	1	2	1	2	3	5	3	4	2	3	4	2.6875	1.19548	0.444829	43	40.0_44.0	0.285938	0.583223	Medium variability
OG0000520	4	1	2	2	2	1	2	3	4	2	2	4	3	5	3	3	2.6875	1.13835	0.423571	43	40.0_44.0	0.285938	0.583223	Medium variability
OG0000521	2	2	4	2	3	3	2	2	2	2	3	4	4	4	2	2	2.6875	0.873212	0.324916	43	40.0_44.0	0.285938	0.583223	Medium variability
OG0000522	4	4	5	1	3	4	3	3	2	3	2	2	2	2	2	1	2.6875	1.13835	0.423571	43	40.0_44.0	0.285938	0.583223	Medium variability
OG0000523	2	2	5	3	2	2	3	3	2	3	2	4	1	4	4	1	2.6875	1.13835	0.423571	43	40.0_44.0	0.285938	0.583223	Medium variability
OG0000524	2	2	4	3	3	2	3	3	2	2	3	4	3	3	2	2	2.6875	0.704154	0.262011	43	40.0_44.0	0.285938	0.583223	Low variability
OG0000525	4	2	7	1	3	2	4	3	1	3	3	3	1	1	2	3	2.6875	1.53704	0.571923	43	40.0_44.0	0.285938	0.583223	Medium variability
OG0000526	3	2	3	3	2	4	2	4	3	7	1	4	1	1	1	2	2.6875	1.57982	0.58784	43	40.0_44.0	0.285938	0.583223	High variability
OG0000527	2	2	2	3	4	3	2	1	7	3	4	1	1	3	3	2	2.6875	1.49304	0.55555	43	40.0_44.0	0.285938	0.583223	Medium variability
OG0000528	6	3	1	2	1	5	1	5	1	1	1	4	1	5	1	5	2.6875	1.95683	0.728121	43	40.0_44.0	0.285938	0.583223	High variability
OG0000529	5	4	2	3	3	1	3	1	2	1	5	1	3	4	2	3	2.6875	1.35247	0.503243	43	40.0_44.0	0.285938	0.583223	Medium variability
OG0000530	4	4	3	2	4	2	2	2	2	3	3	2	2	2	2	4	2.6875	0.873212	0.324916	43	40.0_44.0	0.285938	0.583223	Medium variability
OG0000531	3	1	2	3	5	2	3	2	1	3	2	3	3	2	4	4	2.6875	1.07819	0.401188	43	40.0_44.0	0.285938	0.583223	Medium variability
OG0000532	3	3	3	2	3	1	3	3	2	2	3	3	3	3	4	2	2.6875	0.704154	0.262011	43	40.0_44.0	0.285938	0.583223	Low variability
OG0000533	3	1	4	3	3	2	3	1	3	3	3	3	3	4	2	2	2.6875	0.873212	0.324916	43	40.0_44.0	0.285938	0.583223	Medium variability
OG0000534	3	3	4	2	4	3	3	1	2	4	4	2	2	3	2	1	2.6875	1.01448	0.37748	43	40.0_44.0	0.285938	0.583223	Medium variability
OG0000535	5	2	2	2	2	1	6	0	3	2	5	3	3	1	3	3	2.6875	1.57982	0.58784	43	40.0_44.0	0.285938	0.583223	High variability
OG0000536	2	3	2	3	2	1	3	2	1	3	5	2	3	4	2	5	2.6875	1.19548	0.444829	43	40.0_44.0	0.285938	0.583223	Medium variability
OG0000537	1	2	3	4	2	2	2	5	2	4	3	1	1	5	3	3	2.6875	1.30224	0.484555	43	40.0_44.0	0.285938	0.583223	Medium variability
OG0000538	1	6	3	3	3	1	2	1	4	3	4	1	3	2	2	4	2.6875	1.40089	0.521262	43	40.0_44.0	0.285938	0.583223	Medium variability
OG0000539	2	3	2	3	2	2	3	3	3	3	3	3	2	3	3	3	2.6875	0.478714	0.178126	43	40.0_44.0	0.285938	0.583223	Low variability
OG0000540	3	2	2	4	3	4	4	5	3	2	2	1	3	2	1	2	2.6875	1.13835	0.423571	43	40.0_44.0	0.285938	0.583223	Medium variability
OG0000541	2	2	4	2	3	5	2	3	3	2	3	2	1	4	3	2	2.6875	1.01448	0.37748	43	40.0_44.0	0.285938	0.583223	Medium variability
OG0000542	2	0	6	3	5	3	0	3	0	7	2	2	2	6	0	2	2.6875	2.27211	0.845438	43	40.0_44.0	0.285938	0.583223	High variability
OG0000543	3	3	4	3	2	2	2	3	2	2	1	4	3	3	4	2	2.6875	0.873212	0.324916	43	40.0_44.0	0.285938	0.583223	Medium variability
OG0000544	2	2	3	3	3	3	4	1	4	2	3	3	3	2	3	2	2.6875	0.7932	0.295144	43	40.0_44.0	0.285938	0.583223	Medium variability
OG0000546	3	2	3	3	2	3	4	2	2	2	3	3	2	2	3	3	2.625	0.619139	0.235863	42	40.0_44.0	0.285938	0.583223	Low variability
OG0000547	2	2	3	3	5	1	5	2	2	2	3	2	2	2	2	4	2.625	1.14746	0.437128	42	40.0_44.0	0.285938	0.583223	Medium variability
OG0000548	4	3	4	3	3	2	2	2	2	2	2	2	3	3	3	2	2.625	0.718795	0.273827	42	40.0_44.0	0.285938	0.583223	Low variability
OG0000549	4	2	3	2	5	3	1	2	2	2	6	2	2	1	2	3	2.625	1.36015	0.518151	42	40.0_44.0	0.285938	0.583223	Medium variability
OG0000550	3	3	2	3	2	1	3	2	3	2	4	3	2	2	4	3	2.625	0.806226	0.307134	42	40.0_44.0	0.285938	0.583223	Medium variability
OG0000551	3	1	2	3	4	2	2	1	2	2	3	3	3	3	3	5	2.625	1.0247	0.39036	42	40.0_44.0	0.285938	0.583223	Medium variability
OG0000552	2	3	4	1	2	1	2	4	4	3	2	2	3	3	3	3	2.625	0.957427	0.364734	42	40.0_44.0	0.285938	0.583223	Medium variability
OG0000553	4	3	2	3	3	3	2	3	3	2	4	2	2	2	2	2	2.625	0.718795	0.273827	42	40.0_44.0	0.285938	0.583223	Low variability
OG0000554	2	3	4	3	3	3	1	1	1	5	2	3	1	4	2	4	2.625	1.25831	0.479355	42	40.0_44.0	0.285938	0.583223	Medium variability
OG0000555	3	2	1	3	3	2	3	1	5	3	4	3	3	3	2	1	2.625	1.08781	0.414404	42	40.0_44.0	0.285938	0.583223	Medium variability
OG0000556	3	2	1	3	4	3	3	2	1	1	3	3	4	3	5	1	2.625	1.20416	0.458727	42	40.0_44.0	0.285938	0.583223	Medium variability
OG0000557	3	3	2	4	2	3	2	2	3	3	2	3	3	2	3	2	2.625	0.619139	0.235863	42	40.0_44.0	0.285938	0.583223	Low variability
OG0000558	3	4	3	2	3	2	2	3	4	3	1	2	1	2	3	4	2.625	0.957427	0.364734	42	40.0_44.0	0.285938	0.583223	Medium variability
OG0000559	2	2	2	2	3	2	2	2	4	2	3	4	3	2	4	3	2.625	0.806226	0.307134	42	40.0_44.0	0.285938	0.583223	Medium variability
OG0000560	3	2	3	3	2	3	3	2	2	2	3	2	3	3	3	3	2.625	0.5	0.190476	42	40.0_44.0	0.285938	0.583223	Low variability
OG0000561	4	2	2	3	3	3	2	4	1	3	3	3	3	2	2	2	2.625	0.806226	0.307134	42	40.0_44.0	0.285938	0.583223	Medium variability
OG0000562	4	3	3	2	6	3	0	3	2	3	2	3	1	2	2	3	2.625	1.31022	0.49913	42	40.0_44.0	0.285938	0.583223	Medium variability
OG0000563	4	2	1	2	4	2	2	1	2	4	5	3	2	2	4	2	2.625	1.20416	0.458727	42	40.0_44.0	0.285938	0.583223	Medium variability
OG0000564	2	4	2	2	3	2	2	3	3	3	3	2	2	2	3	4	2.625	0.718795	0.273827	42	40.0_44.0	0.285938	0.583223	Low variability
OG0000565	4	3	3	2	2	2	2	3	2	2	2	3	3	3	3	3	2.625	0.619139	0.235863	42	40.0_44.0	0.285938	0.583223	Low variability
OG0000566	3	2	2	3	2	2	3	3	3	2	4	3	2	4	2	2	2.625	0.718795	0.273827	42	40.0_44.0	0.285938	0.583223	Low variability
OG0000567	3	4	3	1	3	3	1	2	3	2	4	3	3	2	3	2	2.625	0.885061	0.337166	42	40.0_44.0	0.285938	0.583223	Medium variability
OG0000568	2	2	3	3	2	3	2	2	2	3	3	3	3	3	3	3	2.625	0.5	0.190476	42	40.0_44.0	0.285938	0.583223	Low variability
OG0000569	2	2	7	2	3	2	2	1	7	2	2	2	0	3	3	2	2.625	1.85742	0.707588	42	40.0_44.0	0.285938	0.583223	High variability
OG0000570	3	0	2	4	4	3	3	1	3	2	3	2	4	3	2	3	2.625	1.08781	0.414404	42	40.0_44.0	0.285938	0.583223	Medium variability
OG0000571	1	2	3	3	2	1	1	2	3	5	3	2	2	5	2	5	2.625	1.36015	0.518151	42	40.0_44.0	0.285938	0.583223	Medium variability
OG0000572	3	1	5	2	2	4	2	2	2	3	2	5	2	3	1	3	2.625	1.20416	0.458727	42	40.0_44.0	0.285938	0.583223	Medium variability
OG0000573	5	2	5	0	3	2	2	2	1	1	4	2	2	5	5	1	2.625	1.66833	0.635555	42	40.0_44.0	0.285938	0.583223	High variability
OG0000574	4	2	2	3	3	3	2	1	1	3	3	3	3	3	3	3	2.625	0.806226	0.307134	42	40.0_44.0	0.285938	0.583223	Medium variability
OG0000575	4	4	3	4	5	1	2	2	1	2	4	0	1	3	3	3	2.625	1.40831	0.536499	42	40.0_44.0	0.285938	0.583223	Medium variability
OG0000576	4	3	2	2	3	2	2	3	2	3	3	2	3	3	3	2	2.625	0.619139	0.235863	42	40.0_44.0	0.285938	0.583223	Low variability
OG0000577	3	2	3	3	2	3	1	3	3	3	3	3	2	4	2	2	2.625	0.718795	0.273827	42	40.0_44.0	0.285938	0.583223	Low variability
OG0000578	1	4	2	3	3	3	3	1	1	2	4	4	2	2	4	3	2.625	1.08781	0.414404	42	40.0_44.0	0.285938	0.583223	Medium variability
OG0000579	3	2	2	2	3	2	2	2	1	4	3	4	3	2	3	4	2.625	0.885061	0.337166	42	40.0_44.0	0.285938	0.583223	Medium variability
OG0000580	6	3	1	3	1	3	2	4	1	2	7	2	2	2	1	2	2.625	1.74642	0.665305	42	40.0_44.0	0.285938	0.583223	High variability
OG0000581	2	4	3	3	3	4	1	2	3	2	3	1	3	4	2	2	2.625	0.957427	0.364734	42	40.0_44.0	0.285938	0.583223	Medium variability
OG0000582	3	2	2	2	2	3	1	5	2	3	3	4	3	2	3	2	2.625	0.957427	0.364734	42	40.0_44.0	0.285938	0.583223	Medium variability
OG0000583	2	1	2	1	7	2	2	5	1	3	7	1	2	2	2	2	2.625	1.96214	0.747483	42	40.0_44.0	0.285938	0.583223	High variability
OG0000584	3	4	3	1	3	2	4	0	3	2	2	4	2	2	3	4	2.625	1.14746	0.437128	42	40.0_44.0	0.285938	0.583223	Medium variability
OG0000585	2	4	3	4	3	1	2	2	2	1	3	2	3	4	3	3	2.625	0.957427	0.364734	42	40.0_44.0	0.285938	0.583223	Medium variability
OG0000586	2	3	4	3	2	2	3	3	3	3	3	3	1	3	3	1	2.625	0.806226	0.307134	42	40.0_44.0	0.285938	0.583223	Medium variability
OG0000587	4	3	1	4	3	2	0	4	2	3	4	3	2	4	1	2	2.625	1.25831	0.479355	42	40.0_44.0	0.285938	0.583223	Medium variability
OG0000588	2	5	3	3	3	2	3	4	3	3	1	1	1	3	3	2	2.625	1.08781	0.414404	42	40.0_44.0	0.285938	0.583223	Medium variability
OG0000589	1	1	2	1	3	2	3	3	4	6	2	2	1	5	5	1	2.625	1.62788	0.620146	42	40.0_44.0	0.285938	0.583223	High variability
OG0000590	1	2	3	4	1	1	2	4	1	4	2	4	2	4	4	3	2.625	1.25831	0.479355	42	40.0_44.0	0.285938	0.583223	Medium variability
OG0000592	4	2	1	2	6	2	2	3	2	1	5	2	1	2	3	3	2.5625	1.41274	0.551313	41	40.0_44.0	0.285938	0.583223	Medium variability
OG0000593	3	2	3	2	1	2	2	5	3	3	1	3	3	3	2	3	2.5625	0.963933	0.376169	41	40.0_44.0	0.285938	0.583223	Medium variability
OG0000594	3	2	4	4	5	3	2	1	0	3	3	1	3	2	3	2	2.5625	1.26326	0.492981	41	40.0_44.0	0.285938	0.583223	Medium variability
OG0000595	8	2	1	3	3	3	2	2	2	4	2	1	2	3	1	2	2.5625	1.67207	0.652517	41	40.0_44.0	0.285938	0.583223	High variability
OG0000596	4	2	1	1	3	1	2	2	3	3	6	3	2	3	2	3	2.5625	1.26326	0.492981	41	40.0_44.0	0.285938	0.583223	Medium variability
OG0000597	1	3	2	2	3	1	3	2	2	4	4	2	4	3	1	4	2.5625	1.09354	0.426748	41	40.0_44.0	0.285938	0.583223	Medium variability
OG0000598	6	2	3	2	2	3	2	2	2	2	2	2	2	3	3	3	2.5625	1.03078	0.402254	41	40.0_44.0	0.285938	0.583223	Medium variability
OG0000599	3	3	3	3	3	2	1	2	3	5	3	1	4	3	1	1	2.5625	1.15289	0.44991	41	40.0_44.0	0.285938	0.583223	Medium variability
OG0000600	1	2	3	2	2	3	2	2	4	2	4	3	2	3	3	3	2.5625	0.813941	0.317636	41	40.0_44.0	0.285938	0.583223	Medium variability
OG0000601	3	6	2	3	2	2	3	1	3	2	2	2	2	2	2	4	2.5625	1.15289	0.44991	41	40.0_44.0	0.285938	0.583223	Medium variability
OG0000602	4	1	2	3	3	1	3	1	2	3	6	2	2	2	3	3	2.5625	1.26326	0.492981	41	40.0_44.0	0.285938	0.583223	Medium variability
OG0000603	3	2	2	3	2	2	2	4	1	2	2	3	2	5	2	4	2.5625	1.03078	0.402254	41	40.0_44.0	0.285938	0.583223	Medium variability
OG0000604	3	2	3	3	1	2	2	2	3	3	2	3	1	5	3	3	2.5625	0.963933	0.376169	41	40.0_44.0	0.285938	0.583223	Medium variability
OG0000605	2	2	2	3	2	4	3	4	2	1	2	2	2	4	2	4	2.5625	0.963933	0.376169	41	40.0_44.0	0.285938	0.583223	Medium variability
OG0000606	4	2	4	3	3	4	2	1	2	2	3	4	1	3	2	1	2.5625	1.09354	0.426748	41	40.0_44.0	0.285938	0.583223	Medium variability
OG0000607	3	4	3	3	3	2	2	2	3	1	2	2	3	3	2	3	2.5625	0.727438	0.283878	41	40.0_44.0	0.285938	0.583223	Low variability
OG0000608	5	2	4	5	1	1	1	1	4	3	2	2	1	1	3	5	2.5625	1.59034	0.620619	41	40.0_44.0	0.285938	0.583223	High variability
OG0000609	1	1	3	2	3	3	2	2	3	3	2	4	4	3	3	2	2.5625	0.892095	0.348135	41	40.0_44.0	0.285938	0.583223	Medium variability
OG0000610	3	1	4	2	2	2	4	3	2	3	2	2	2	4	3	2	2.5625	0.892095	0.348135	41	40.0_44.0	0.285938	0.583223	Medium variability
OG0000611	2	1	3	3	3	4	2	2	2	2	3	4	2	2	3	3	2.5625	0.813941	0.317636	41	40.0_44.0	0.285938	0.583223	Medium variability
OG0000612	1	3	2	4	3	2	1	2	2	3	4	2	1	2	4	5	2.5625	1.20934	0.471937	41	40.0_44.0	0.285938	0.583223	Medium variability
OG0000613	4	2	3	3	1	2	2	3	2	3	2	3	2	1	6	2	2.5625	1.20934	0.471937	41	40.0_44.0	0.285938	0.583223	Medium variability
OG0000614	2	2	5	2	4	2	2	2	4	3	2	1	3	1	4	2	2.5625	1.15289	0.44991	41	40.0_44.0	0.285938	0.583223	Medium variability
OG0000615	5	1	3	3	5	2	3	1	3	2	4	3	1	0	4	1	2.5625	1.50416	0.58699	41	40.0_44.0	0.285938	0.583223	High variability
OG0000616	2	2	1	2	3	3	1	1	6	2	7	2	2	2	3	2	2.5625	1.67207	0.652517	41	40.0_44.0	0.285938	0.583223	High variability
OG0000617	3	1	2	0	8	2	4	1	2	2	5	0	3	4	4	0	2.5625	2.12818	0.830511	41	40.0_44.0	0.285938	0.583223	High variability
OG0000618	5	4	0	5	2	1	1	1	1	3	2	4	3	3	4	2	2.5625	1.54785	0.604038	41	40.0_44.0	0.285938	0.583223	High variability
OG0000619	1	3	2	2	3	2	2	5	4	2	3	2	2	2	2	4	2.5625	1.03078	0.402254	41	40.0_44.0	0.285938	0.583223	Medium variability
OG0000620	4	2	3	3	2	2	3	5	2	2	2	2	2	2	2	3	2.5625	0.892095	0.348135	41	40.0_44.0	0.285938	0.583223	Medium variability
OG0000621	3	2	2	3	3	4	2	1	2	3	2	4	2	2	4	2	2.5625	0.892095	0.348135	41	40.0_44.0	0.285938	0.583223	Medium variability
OG0000622	1	4	3	3	6	2	1	1	2	2	3	3	3	2	2	3	2.5625	1.26326	0.492981	41	40.0_44.0	0.285938	0.583223	Medium variability
OG0000623	5	1	3	3	4	1	3	2	3	2	4	1	1	2	4	2	2.5625	1.26326	0.492981	41	40.0_44.0	0.285938	0.583223	Medium variability
OG0000624	3	3	2	2	5	3	3	3	2	3	4	2	1	3	1	1	2.5625	1.09354	0.426748	41	40.0_44.0	0.285938	0.583223	Medium variability
OG0000625	3	2	2	3	1	3	1	2	3	3	3	4	3	2	4	2	2.5625	0.892095	0.348135	41	40.0_44.0	0.285938	0.583223	Medium variability
OG0000626	2	5	3	3	3	2	2	2	2	2	2	2	1	2	3	5	2.5625	1.09354	0.426748	41	40.0_44.0	0.285938	0.583223	Medium variability
OG0000627	5	3	2	3	4	2	2	2	2	2	4	4	2	1	2	1	2.5625	1.15289	0.44991	41	40.0_44.0	0.285938	0.583223	Medium variability
OG0000628	4	2	0	2	3	2	2	2	3	4	7	2	2	2	1	3	2.5625	1.54785	0.604038	41	40.0_44.0	0.285938	0.583223	High variability
OG0000629	2	2	1	2	2	3	3	1	4	4	3	2	3	4	3	2	2.5625	0.963933	0.376169	41	40.0_44.0	0.285938	0.583223	Medium variability
OG0000630	2	3	3	3	3	2	2	2	3	2	3	3	2	2	3	3	2.5625	0.512348	0.199941	41	40.0_44.0	0.285938	0.583223	Low variability
OG0000631	3	4	2	2	3	4	2	4	1	1	2	2	2	3	2	4	2.5625	1.03078	0.402254	41	40.0_44.0	0.285938	0.583223	Medium variability
OG0000632	2	3	3	1	3	2	2	2	2	4	3	3	1	3	4	3	2.5625	0.892095	0.348135	41	40.0_44.0	0.285938	0.583223	Medium variability
OG0000633	2	3	3	3	2	3	2	2	2	2	2	4	4	2	3	2	2.5625	0.727438	0.283878	41	40.0_44.0	0.285938	0.583223	Low variability
OG0000634	1	2	3	3	4	1	1	6	1	2	3	3	2	2	5	2	2.5625	1.45917	0.569431	41	40.0_44.0	0.285938	0.583223	Medium variability
OG0000635	4	3	2	3	3	3	1	2	2	3	3	3	2	3	2	2	2.5625	0.727438	0.283878	41	40.0_44.0	0.285938	0.583223	Low variability
OG0000636	3	1	3	3	3	2	3	2	1	1	5	2	4	4	2	2	2.5625	1.15289	0.44991	41	40.0_44.0	0.285938	0.583223	Medium variability
OG0000637	2	4	2	2	4	3	2	1	1	2	6	2	2	3	2	3	2.5625	1.26326	0.492981	41	40.0_44.0	0.285938	0.583223	Medium variability
OG0000638	3	3	4	3	3	4	1	3	2	2	4	2	2	1	3	1	2.5625	1.03078	0.402254	41	40.0_44.0	0.285938	0.583223	Medium variability
OG0000639	1	2	4	1	5	3	2	2	2	3	3	2	3	4	2	2	2.5625	1.09354	0.426748	41	40.0_44.0	0.285938	0.583223	Medium variability
OG0000641	3	1	5	0	4	2	3	1	3	4	3	4	1	2	2	2	2.5	1.36626	0.546504	40	40.0_44.0	0.285938	0.583223	Medium variability
OG0000642	4	5	2	2	3	3	2	2	2	2	2	2	2	3	2	2	2.5	0.894427	0.357771	40	40.0_44.0	0.285938	0.583223	Medium variability
OG0000643	2	2	2	2	4	4	1	2	2	2	2	3	2	2	4	4	2.5	0.966092	0.386437	40	40.0_44.0	0.285938	0.583223	Medium variability
OG0000644	2	3	2	2	4	2	3	2	3	2	3	2	2	3	3	2	2.5	0.632456	0.252982	40	40.0_44.0	0.285938	0.583223	Low variability
OG0000645	3	1	2	3	3	2	2	1	2	2	4	3	3	3	3	3	2.5	0.816497	0.326599	40	40.0_44.0	0.285938	0.583223	Medium variability
OG0000646	3	4	4	0	3	1	1	2	3	1	5	2	2	2	3	4	2.5	1.36626	0.546504	40	40.0_44.0	0.285938	0.583223	Medium variability
OG0000647	5	2	2	2	6	1	1	2	2	1	7	2	2	2	1	2	2.5	1.82574	0.730297	40	40.0_44.0	0.285938	0.583223	High variability
OG0000648	3	1	4	2	2	0	2	2	6	2	2	3	2	2	3	4	2.5	1.36626	0.546504	40	40.0_44.0	0.285938	0.583223	Medium variability
OG0000649	5	1	1	2	7	2	0	2	3	3	7	1	3	1	0	2	2.5	2.16025	0.864099	40	40.0_44.0	0.285938	0.583223	High variability
OG0000650	2	0	3	4	5	5	2	1	2	2	1	2	3	2	5	1	2.5	1.54919	0.619677	40	40.0_44.0	0.285938	0.583223	High variability
OG0000651	3	2	4	2	4	2	2	2	3	1	4	2	4	2	1	2	2.5	1.0328	0.413118	40	40.0_44.0	0.285938	0.583223	Medium variability
OG0000652	3	2	1	4	6	1	4	1	1	1	6	3	2	2	2	1	2.5	1.7127	0.685079	40	40.0_44.0	0.285938	0.583223	High variability
OG0000653	5	3	1	1	6	1	2	1	2	1	8	2	1	2	2	2	2.5	2.06559	0.826236	40	40.0_44.0	0.285938	0.583223	High variability
OG0000654	2	1	2	3	2	2	4	3	3	3	2	3	3	4	2	1	2.5	0.894427	0.357771	40	40.0_44.0	0.285938	0.583223	Medium variability
OG0000655	2	2	3	3	3	4	3	2	4	3	1	2	2	2	2	2	2.5	0.816497	0.326599	40	40.0_44.0	0.285938	0.583223	Medium variability
OG0000656	2	2	3	3	2	2	2	9	2	2	2	1	2	1	2	3	2.5	1.82574	0.730297	40	40.0_44.0	0.285938	0.583223	High variability
OG0000657	2	6	3	3	4	2	3	2	3	2	1	2	1	2	3	1	2.5	1.26491	0.505964	40	40.0_44.0	0.285938	0.583223	Medium variability
OG0000658	4	2	2	3	2	4	2	2	4	2	2	2	2	3	2	2	2.5	0.816497	0.326599	40	40.0_44.0	0.285938	0.583223	Medium variability
OG0000659	2	3	2	1	4	1	2	3	1	1	4	3	9	1	1	2	2.5	2.03306	0.813224	40	40.0_44.0	0.285938	0.583223	High variability
OG0000660	3	3	2	2	2	2	3	2	3	3	3	2	2	3	2	3	2.5	0.516398	0.206559	40	40.0_44.0	0.285938	0.583223	Low variability
OG0000661	3	2	3	3	3	2	2	2	2	4	3	2	2	3	3	1	2.5	0.730297	0.292119	40	40.0_44.0	0.285938	0.583223	Medium variability
OG0000662	2	0	3	2	5	3	3	1	4	3	2	2	3	3	2	2	2.5	1.1547	0.46188	40	40.0_44.0	0.285938	0.583223	Medium variability
OG0000663	2	0	3	2	3	3	2	6	3	4	3	2	2	2	2	1	2.5	1.31656	0.526624	40	40.0_44.0	0.285938	0.583223	Medium variability
OG0000664	3	3	2	2	3	2	3	1	2	2	4	2	3	2	3	3	2.5	0.730297	0.292119	40	40.0_44.0	0.285938	0.583223	Medium variability
OG0000665	2	4	3	2	2	2	3	2	2	3	2	2	2	3	3	3	2.5	0.632456	0.252982	40	40.0_44.0	0.285938	0.583223	Low variability
OG0000666	4	1	1	2	5	3	2	3	2	3	3	2	2	2	3	2	2.5	1.0328	0.413118	40	40.0_44.0	0.285938	0.583223	Medium variability
OG0000667	1	1	5	2	5	3	2	1	3	2	3	2	1	2	3	4	2.5	1.31656	0.526624	40	40.0_44.0	0.285938	0.583223	Medium variability
OG0000668	2	3	1	3	3	2	2	2	2	2	3	3	4	3	3	2	2.5	0.730297	0.292119	40	40.0_44.0	0.285938	0.583223	Medium variability
OG0000669	3	3	2	2	3	3	2	2	1	2	2	3	3	3	3	3	2.5	0.632456	0.252982	40	40.0_44.0	0.285938	0.583223	Low variability
OG0000670	3	2	4	2	3	2	2	2	2	2	3	3	3	2	2	3	2.5	0.632456	0.252982	40	40.0_44.0	0.285938	0.583223	Low variability
OG0000671	3	2	3	2	4	2	2	2	2	1	4	2	2	3	2	4	2.5	0.894427	0.357771	40	40.0_44.0	0.285938	0.583223	Medium variability
OG0000672	3	4	3	1	2	2	2	2	1	2	5	2	1	3	2	5	2.5	1.26491	0.505964	40	40.0_44.0	0.285938	0.583223	Medium variability
OG0000673	3	4	5	2	2	2	2	2	3	1	2	3	2	3	2	2	2.5	0.966092	0.386437	40	40.0_44.0	0.285938	0.583223	Medium variability
OG0000674	3	3	2	2	3	3	1	2	3	3	3	2	2	4	1	3	2.5	0.816497	0.326599	40	40.0_44.0	0.285938	0.583223	Medium variability
OG0000675	3	1	3	2	2	0	2	4	2	3	2	3	4	2	4	3	2.5	1.09545	0.438178	40	40.0_44.0	0.285938	0.583223	Medium variability
OG0000676	3	2	2	4	5	2	2	3	3	3	4	1	3	2	1	0	2.5	1.26491	0.505964	40	40.0_44.0	0.285938	0.583223	Medium variability
OG0000677	2	2	2	2	4	1	1	3	2	2	4	3	3	1	4	4	2.5	1.09545	0.438178	40	40.0_44.0	0.285938	0.583223	Medium variability
OG0000678	2	2	2	4	4	3	1	6	5	1	0	2	0	2	2	4	2.5	1.7127	0.685079	40	40.0_44.0	0.285938	0.583223	High variability
OG0000679	1	1	1	3	3	5	2	1	3	3	3	4	1	5	2	2	2.5	1.36626	0.546504	40	40.0_44.0	0.285938	0.583223	Medium variability
OG0000680	3	2	4	2	2	2	3	3	2	5	2	2	2	2	2	2	2.5	0.894427	0.357771	40	40.0_44.0	0.285938	0.583223	Medium variability
OG0000681	1	2	3	3	2	2	2	3	4	2	3	2	2	3	3	3	2.5	0.730297	0.292119	40	40.0_44.0	0.285938	0.583223	Medium variability
OG0000682	2	2	2	2	3	3	2	4	2	3	3	3	2	2	3	2	2.5	0.632456	0.252982	40	40.0_44.0	0.285938	0.583223	Low variability
OG0000683	2	3	2	2	2	4	2	1	4	3	4	1	3	3	3	1	2.5	1.0328	0.413118	40	40.0_44.0	0.285938	0.583223	Medium variability
OG0000684	1	3	3	2	3	3	3	3	2	2	2	3	3	3	1	3	2.5	0.730297	0.292119	40	40.0_44.0	0.285938	0.583223	Medium variability
OG0000685	0	1	4	8	1	6	0	4	1	3	2	2	2	5	0	1	2.5	2.33809	0.935236	40	40.0_44.0	0.285938	0.583223	High variability
OG0000686	5	3	1	2	3	1	1	1	3	4	5	1	1	4	2	2	2.4375	1.45917	0.598632	39	36.0_40.0	0.26069	0.617092	Medium variability
OG0000687	5	3	1	1	3	2	3	2	1	1	4	1	4	3	2	3	2.4375	1.26326	0.518262	39	36.0_40.0	0.26069	0.617092	Medium variability
OG0000688	3	2	2	3	3	1	3	1	2	2	2	3	3	3	4	2	2.4375	0.813941	0.333925	39	36.0_40.0	0.26069	0.617092	Medium variability
OG0000689	3	3	2	2	3	2	1	3	2	1	5	1	3	3	2	3	2.4375	1.03078	0.422883	39	36.0_40.0	0.26069	0.617092	Medium variability
OG0000690	2	2	4	2	3	1	2	3	4	3	2	1	1	4	3	2	2.4375	1.03078	0.422883	39	36.0_40.0	0.26069	0.617092	Medium variability
OG0000691	2	3	3	3	2	3	2	2	2	3	2	2	2	3	2	3	2.4375	0.512348	0.210194	39	36.0_40.0	0.26069	0.617092	Low variability
OG0000692	2	3	3	1	2	3	3	2	3	2	2	3	3	2	3	2	2.4375	0.629153	0.258114	39	36.0_40.0	0.26069	0.617092	Low variability
OG0000693	4	2	2	2	4	3	2	2	2	1	3	1	2	3	2	4	2.4375	0.963933	0.39546	39	36.0_40.0	0.26069	0.617092	Medium variability
OG0000694	3	4	2	2	2	2	2	3	2	2	3	2	2	4	2	2	2.4375	0.727438	0.298436	39	36.0_40.0	0.26069	0.617092	Medium variability
OG0000695	3	2	2	2	3	3	3	2	2	4	3	2	2	2	2	2	2.4375	0.629153	0.258114	39	36.0_40.0	0.26069	0.617092	Low variability
OG0000696	2	3	3	3	2	3	2	1	4	2	3	1	4	2	3	1	2.4375	0.963933	0.39546	39	36.0_40.0	0.26069	0.617092	Medium variability
OG0000697	2	2	4	4	2	3	3	1	2	2	2	3	3	2	2	2	2.4375	0.813941	0.333925	39	36.0_40.0	0.26069	0.617092	Medium variability
OG0000698	3	2	3	3	2	2	2	4	2	3	3	3	1	4	2	0	2.4375	1.03078	0.422883	39	36.0_40.0	0.26069	0.617092	Medium variability
OG0000699	5	5	1	2	3	2	2	2	2	1	2	2	2	2	3	3	2.4375	1.15289	0.472983	39	36.0_40.0	0.26069	0.617092	Medium variability
OG0000700	7	4	5	2	0	3	1	1	0	4	0	3	3	2	1	3	2.4375	1.96532	0.806287	39	36.0_40.0	0.26069	0.617092	High variability
OG0000701	4	1	1	2	5	2	2	3	2	1	6	1	2	3	1	3	2.4375	1.50416	0.617092	39	36.0_40.0	0.26069	0.617092	Medium variability
OG0000702	2	2	2	4	2	2	3	2	3	1	2	4	2	4	2	2	2.4375	0.892095	0.365988	39	36.0_40.0	0.26069	0.617092	Medium variability
OG0000703	2	2	6	2	6	3	2	1	1	3	3	1	2	0	3	2	2.4375	1.63172	0.669422	39	36.0_40.0	0.26069	0.617092	High variability
OG0000704	3	3	2	2	3	2	3	3	2	1	3	3	3	2	2	2	2.4375	0.629153	0.258114	39	36.0_40.0	0.26069	0.617092	Low variability
OG0000705	3	3	1	3	2	2	2	3	2	2	3	3	2	3	3	2	2.4375	0.629153	0.258114	39	36.0_40.0	0.26069	0.617092	Low variability
OG0000706	3	2	2	2	3	2	4	2	2	3	3	2	3	2	2	2	2.4375	0.629153	0.258114	39	36.0_40.0	0.26069	0.617092	Low variability
OG0000707	3	3	2	2	6	4	1	3	2	1	4	2	1	2	2	1	2.4375	1.36473	0.559891	39	36.0_40.0	0.26069	0.617092	Medium variability
OG0000708	3	2	3	3	3	3	1	2	3	2	3	3	2	2	3	1	2.4375	0.727438	0.298436	39	36.0_40.0	0.26069	0.617092	Medium variability
OG0000709	3	1	2	3	3	2	2	2	3	3	3	2	3	2	2	3	2.4375	0.629153	0.258114	39	36.0_40.0	0.26069	0.617092	Low variability
OG0000710	2	3	3	3	3	2	2	2	3	2	3	1	2	3	2	3	2.4375	0.629153	0.258114	39	36.0_40.0	0.26069	0.617092	Low variability
OG0000711	2	2	2	3	3	3	2	3	2	3	3	2	3	3	2	1	2.4375	0.629153	0.258114	39	36.0_40.0	0.26069	0.617092	Low variability
OG0000712	2	2	3	3	3	3	3	3	2	2	1	2	2	3	3	2	2.4375	0.629153	0.258114	39	36.0_40.0	0.26069	0.617092	Low variability
OG0000713	2	2	3	2	2	2	3	1	2	2	3	3	2	3	3	4	2.4375	0.727438	0.298436	39	36.0_40.0	0.26069	0.617092	Medium variability
OG0000714	2	2	1	3	2	4	3	2	3	2	2	2	3	2	3	3	2.4375	0.727438	0.298436	39	36.0_40.0	0.26069	0.617092	Medium variability
OG0000715	3	3	2	3	2	1	2	3	3	3	2	3	2	2	3	2	2.4375	0.629153	0.258114	39	36.0_40.0	0.26069	0.617092	Low variability
OG0000716	2	5	1	2	4	2	1	2	3	2	3	3	1	0	3	5	2.4375	1.41274	0.579585	39	36.0_40.0	0.26069	0.617092	Medium variability
OG0000717	4	1	4	3	2	4	1	2	1	2	3	3	2	3	1	3	2.4375	1.09354	0.448632	39	36.0_40.0	0.26069	0.617092	Medium variability
OG0000718	3	2	3	2	2	3	3	3	2	2	4	2	2	2	2	2	2.4375	0.629153	0.258114	39	36.0_40.0	0.26069	0.617092	Low variability
OG0000719	2	2	3	2	3	2	2	1	3	3	3	3	2	2	3	3	2.4375	0.629153	0.258114	39	36.0_40.0	0.26069	0.617092	Low variability
OG0000720	3	3	2	3	3	2	2	4	1	3	2	2	2	1	3	3	2.4375	0.813941	0.333925	39	36.0_40.0	0.26069	0.617092	Medium variability
OG0000721	2	2	1	2	4	3	1	3	2	4	5	2	1	2	2	3	2.4375	1.15289	0.472983	39	36.0_40.0	0.26069	0.617092	Medium variability
OG0000722	3	2	2	3	3	2	2	3	2	3	4	3	2	2	2	1	2.4375	0.727438	0.298436	39	36.0_40.0	0.26069	0.617092	Medium variability
OG0000723	2	2	3	2	4	4	2	1	2	1	2	4	2	3	3	2	2.4375	0.963933	0.39546	39	36.0_40.0	0.26069	0.617092	Medium variability
OG0000724	2	3	3	2	2	3	2	4	3	2	2	2	2	3	2	2	2.4375	0.629153	0.258114	39	36.0_40.0	0.26069	0.617092	Low variability
OG0000725	2	1	1	6	0	1	1	7	3	6	0	4	1	1	2	3	2.4375	2.22017	0.91084	39	36.0_40.0	0.26069	0.617092	High variability
OG0000726	2	3	2	1	3	3	2	1	2	3	3	3	2	4	3	2	2.4375	0.813941	0.333925	39	36.0_40.0	0.26069	0.617092	Medium variability
OG0000727	4	2	3	2	3	3	3	1	4	2	3	1	1	2	2	3	2.4375	0.963933	0.39546	39	36.0_40.0	0.26069	0.617092	Medium variability
OG0000728	2	3	2	2	2	2	3	2	2	3	2	3	3	3	3	2	2.4375	0.512348	0.210194	39	36.0_40.0	0.26069	0.617092	Low variability
OG0000729	2	2	3	3	3	3	3	2	1	3	2	2	3	3	2	2	2.4375	0.629153	0.258114	39	36.0_40.0	0.26069	0.617092	Low variability
OG0000730	3	2	2	3	3	3	1	2	2	2	1	3	3	1	4	4	2.4375	0.963933	0.39546	39	36.0_40.0	0.26069	0.617092	Medium variability
OG0000731	4	3	3	2	3	2	4	2	1	3	3	0	3	1	2	3	2.4375	1.09354	0.448632	39	36.0_40.0	0.26069	0.617092	Medium variability
OG0000732	2	3	2	3	2	2	2	2	3	2	3	2	2	3	2	4	2.4375	0.629153	0.258114	39	36.0_40.0	0.26069	0.617092	Low variability
OG0000733	3	4	2	1	4	2	2	2	2	2	4	2	2	3	3	1	2.4375	0.963933	0.39546	39	36.0_40.0	0.26069	0.617092	Medium variability
OG0000734	1	5	2	2	3	2	2	3	3	4	2	1	2	1	3	3	2.4375	1.09354	0.448632	39	36.0_40.0	0.26069	0.617092	Medium variability
OG0000735	2	4	2	2	2	4	1	2	1	2	7	1	2	5	1	1	2.4375	1.71148	0.702146	39	36.0_40.0	0.26069	0.617092	High variability
OG0000736	1	3	3	2	3	2	2	4	2	2	2	3	2	3	2	3	2.4375	0.727438	0.298436	39	36.0_40.0	0.26069	0.617092	Medium variability
OG0000737	1	3	1	3	4	3	4	4	2	1	3	1	2	3	2	2	2.4375	1.09354	0.448632	39	36.0_40.0	0.26069	0.617092	Medium variability
OG0000738	2	2	2	4	5	2	2	2	3	3	4	1	3	1	2	1	2.4375	1.15289	0.472983	39	36.0_40.0	0.26069	0.617092	Medium variability
OG0000739	2	2	3	4	2	3	2	2	2	2	2	3	2	4	3	1	2.4375	0.813941	0.333925	39	36.0_40.0	0.26069	0.617092	Medium variability
OG0000740	2	2	4	3	2	3	2	2	1	2	2	3	2	3	2	4	2.4375	0.813941	0.333925	39	36.0_40.0	0.26069	0.617092	Medium variability
OG0000741	1	0	4	4	4	3	4	3	4	1	3	2	1	2	2	1	2.4375	1.36473	0.559891	39	36.0_40.0	0.26069	0.617092	Medium variability
OG0000742	1	0	8	0	0	0	0	24	0	4	0	0	0	0	0	2	2.4375	6.14241	2.51996	39	36.0_40.0	0.26069	0.617092	High variability
OG0000743	1	0	1	2	5	1	6	0	2	1	3	1	3	5	7	1	2.4375	2.18994	0.898437	39	36.0_40.0	0.26069	0.617092	High variability
OG0000744	0	2	7	3	2	1	0	0	3	6	2	2	1	5	4	1	2.4375	2.12818	0.873101	39	36.0_40.0	0.26069	0.617092	High variability
OG0000745	0	2	2	2	3	3	1	2	4	4	6	2	0	5	2	1	2.4375	1.67207	0.685979	39	36.0_40.0	0.26069	0.617092	High variability
OG0000746	0	2	1	4	5	2	3	0	1	4	2	7	1	3	2	2	2.4375	1.86078	0.763397	39	36.0_40.0	0.26069	0.617092	High variability
OG0000747	0	0	3	0	0	0	0	36	0	0	0	0	0	0	0	0	2.4375	8.98123	3.68461	39	36.0_40.0	0.26069	0.617092	High variability
OG0000748	2	2	2	3	3	2	2	3	2	3	3	2	3	2	2	2	2.375	0.5	0.210526	38	36.0_40.0	0.26069	0.617092	Low variability
OG0000749	5	1	2	2	6	2	4	1	1	2	4	1	2	2	1	2	2.375	1.5438	0.650023	38	36.0_40.0	0.26069	0.617092	High variability
OG0000750	3	2	2	1	5	1	3	4	2	3	4	2	1	2	1	2	2.375	1.20416	0.507015	38	36.0_40.0	0.26069	0.617092	Medium variability
OG0000751	2	2	3	3	3	2	2	2	2	2	2	3	3	2	4	1	2.375	0.718795	0.302651	38	36.0_40.0	0.26069	0.617092	Medium variability
OG0000752	2	2	3	2	3	3	2	2	2	3	3	2	2	3	2	2	2.375	0.5	0.210526	38	36.0_40.0	0.26069	0.617092	Low variability
OG0000753	3	2	2	2	4	2	2	1	3	2	4	2	2	3	2	2	2.375	0.806226	0.339463	38	36.0_40.0	0.26069	0.617092	Medium variability
OG0000754	2	2	2	2	2	2	2	4	3	4	2	2	2	3	2	2	2.375	0.718795	0.302651	38	36.0_40.0	0.26069	0.617092	Medium variability
OG0000755	3	1	3	1	3	4	2	1	2	1	4	3	5	2	1	2	2.375	1.25831	0.529813	38	36.0_40.0	0.26069	0.617092	Medium variability
OG0000756	3	3	2	1	3	2	1	3	3	3	3	2	3	2	3	1	2.375	0.806226	0.339463	38	36.0_40.0	0.26069	0.617092	Medium variability
OG0000757	4	4	2	1	4	1	0	1	0	3	6	4	0	5	2	1	2.375	1.92787	0.811733	38	36.0_40.0	0.26069	0.617092	High variability
OG0000758	3	3	3	3	1	2	2	2	3	2	3	3	2	2	2	2	2.375	0.619139	0.26069	38	36.0_40.0	0.26069	0.617092	Medium variability
OG0000759	3	2	3	3	2	2	2	2	2	2	2	3	3	3	2	2	2.375	0.5	0.210526	38	36.0_40.0	0.26069	0.617092	Low variability
OG0000760	4	2	2	2	5	2	2	2	2	2	2	3	2	2	2	2	2.375	0.885061	0.372657	38	36.0_40.0	0.26069	0.617092	Medium variability
OG0000761	4	3	1	1	3	2	3	3	2	3	2	2	2	2	2	3	2.375	0.806226	0.339463	38	36.0_40.0	0.26069	0.617092	Medium variability
OG0000762	3	2	2	2	2	1	3	2	3	2	4	3	2	2	3	2	2.375	0.718795	0.302651	38	36.0_40.0	0.26069	0.617092	Medium variability
OG0000763	2	2	1	2	1	2	1	5	3	4	4	2	2	2	3	2	2.375	1.14746	0.483141	38	36.0_40.0	0.26069	0.617092	Medium variability
OG0000764	4	2	3	2	3	2	2	2	2	1	5	3	1	2	2	2	2.375	1.0247	0.431451	38	36.0_40.0	0.26069	0.617092	Medium variability
OG0000765	3	2	2	2	4	3	3	2	2	2	2	2	3	2	3	1	2.375	0.718795	0.302651	38	36.0_40.0	0.26069	0.617092	Medium variability
OG0000766	2	2	1	3	2	2	3	3	2	2	3	3	3	2	2	3	2.375	0.619139	0.26069	38	36.0_40.0	0.26069	0.617092	Medium variability
OG0000767	6	3	3	1	1	2	1	3	3	4	1	2	2	1	2	3	2.375	1.36015	0.572693	38	36.0_40.0	0.26069	0.617092	Medium variability
OG0000768	4	3	3	2	2	2	2	1	2	2	2	2	3	2	3	3	2.375	0.718795	0.302651	38	36.0_40.0	0.26069	0.617092	Medium variability
OG0000769	5	1	1	1	4	2	2	2	2	2	6	1	1	3	2	3	2.375	1.5	0.631579	38	36.0_40.0	0.26069	0.617092	High variability
OG0000770	5	3	3	2	1	1	0	1	4	5	4	1	0	5	0	3	2.375	1.85742	0.782071	38	36.0_40.0	0.26069	0.617092	High variability
OG0000771	3	2	2	2	3	4	2	2	2	2	2	2	2	2	2	4	2.375	0.718795	0.302651	38	36.0_40.0	0.26069	0.617092	Medium variability
OG0000772	2	2	2	3	2	3	3	3	3	3	1	2	1	2	3	3	2.375	0.718795	0.302651	38	36.0_40.0	0.26069	0.617092	Medium variability
OG0000773	4	2	7	2	4	4	2	4	0	2	3	2	0	0	0	2	2.375	1.92787	0.811733	38	36.0_40.0	0.26069	0.617092	High variability
OG0000774	2	1	3	4	2	2	2	3	2	2	3	4	1	3	2	2	2.375	0.885061	0.372657	38	36.0_40.0	0.26069	0.617092	Medium variability
OG0000775	2	2	2	3	3	2	4	2	1	3	3	2	3	1	3	2	2.375	0.806226	0.339463	38	36.0_40.0	0.26069	0.617092	Medium variability
OG0000776	2	2	3	3	2	2	1	2	3	2	2	4	2	3	3	2	2.375	0.718795	0.302651	38	36.0_40.0	0.26069	0.617092	Medium variability
OG0000777	2	1	3	2	8	1	2	2	3	2	4	4	1	1	1	1	2.375	1.82117	0.766809	38	36.0_40.0	0.26069	0.617092	High variability
OG0000778	2	2	2	2	2	2	2	2	3	3	3	3	2	2	3	3	2.375	0.5	0.210526	38	36.0_40.0	0.26069	0.617092	Low variability
OG0000779	2	3	2	3	2	2	3	2	2	3	3	2	3	2	2	2	2.375	0.5	0.210526	38	36.0_40.0	0.26069	0.617092	Low variability
OG0000780	2	3	3	1	2	2	3	2	3	3	2	3	2	2	2	3	2.375	0.619139	0.26069	38	36.0_40.0	0.26069	0.617092	Medium variability
OG0000781	2	2	1	2	3	2	2	2	4	2	3	1	1	4	5	2	2.375	1.14746	0.483141	38	36.0_40.0	0.26069	0.617092	Medium variability
OG0000782	3	2	1	1	6	1	1	2	2	0	8	1	1	4	2	3	2.375	2.09364	0.881533	38	36.0_40.0	0.26069	0.617092	High variability
OG0000783	2	2	3	3	3	3	2	3	2	2	2	2	3	2	2	2	2.375	0.5	0.210526	38	36.0_40.0	0.26069	0.617092	Low variability
OG0000784	4	3	4	2	2	2	2	0	2	3	2	3	2	2	2	3	2.375	0.957427	0.403127	38	36.0_40.0	0.26069	0.617092	Medium variability
OG0000785	1	3	2	3	2	2	1	2	3	1	2	2	3	5	4	2	2.375	1.08781	0.458026	38	36.0_40.0	0.26069	0.617092	Medium variability
OG0000786	3	1	4	2	4	2	1	1	2	2	4	4	2	3	2	1	2.375	1.14746	0.483141	38	36.0_40.0	0.26069	0.617092	Medium variability
OG0000787	1	3	4	3	1	2	1	3	2	2	2	3	4	2	3	2	2.375	0.957427	0.403127	38	36.0_40.0	0.26069	0.617092	Medium variability
OG0000788	2	2	2	1	5	2	1	2	2	2	7	2	2	3	2	1	2.375	1.5438	0.650023	38	36.0_40.0	0.26069	0.617092	High variability
OG0000789	2	3	2	2	6	2	3	2	0	2	5	2	2	2	0	3	2.375	1.5	0.631579	38	36.0_40.0	0.26069	0.617092	High variability
OG0000790	2	1	1	2	4	2	2	1	2	3	1	2	5	5	3	2	2.375	1.31022	0.55167	38	36.0_40.0	0.26069	0.617092	Medium variability
OG0000791	3	3	0	4	3	3	2	1	3	2	3	2	3	2	2	2	2.375	0.957427	0.403127	38	36.0_40.0	0.26069	0.617092	Medium variability
OG0000792	2	2	2	2	3	1	2	1	4	2	5	2	2	4	2	2	2.375	1.08781	0.458026	38	36.0_40.0	0.26069	0.617092	Medium variability
OG0000793	1	3	0	2	4	3	1	3	2	4	3	3	3	2	3	1	2.375	1.14746	0.483141	38	36.0_40.0	0.26069	0.617092	Medium variability
OG0000794	1	3	5	1	3	2	0	1	4	3	3	4	3	1	2	2	2.375	1.36015	0.572693	38	36.0_40.0	0.26069	0.617092	Medium variability
OG0000795	2	2	3	2	3	3	2	2	3	2	4	1	2	3	2	2	2.375	0.718795	0.302651	38	36.0_40.0	0.26069	0.617092	Medium variability
OG0000796	2	3	2	2	3	2	2	2	2	2	4	3	2	3	2	2	2.375	0.619139	0.26069	38	36.0_40.0	0.26069	0.617092	Medium variability
OG0000797	4	3	1	2	4	2	2	1	3	2	3	2	2	2	3	2	2.375	0.885061	0.372657	38	36.0_40.0	0.26069	0.617092	Medium variability
OG0000798	2	0	3	2	2	4	1	3	2	4	2	3	2	3	3	2	2.375	1.0247	0.431451	38	36.0_40.0	0.26069	0.617092	Medium variability
OG0000799	4	2	2	2	2	2	1	2	2	3	5	2	3	1	2	3	2.375	1.0247	0.431451	38	36.0_40.0	0.26069	0.617092	Medium variability
OG0000800	1	2	2	5	3	3	1	3	4	1	2	3	1	3	2	2	2.375	1.14746	0.483141	38	36.0_40.0	0.26069	0.617092	Medium variability
OG0000801	2	2	4	2	2	1	1	2	3	2	2	3	3	2	3	4	2.375	0.885061	0.372657	38	36.0_40.0	0.26069	0.617092	Medium variability
OG0000802	2	1	2	2	3	1	2	2	4	2	4	2	3	2	3	3	2.375	0.885061	0.372657	38	36.0_40.0	0.26069	0.617092	Medium variability
OG0000803	2	3	3	1	4	2	2	1	4	2	3	4	3	1	2	1	2.375	1.08781	0.458026	38	36.0_40.0	0.26069	0.617092	Medium variability
OG0000804	3	2	3	2	3	2	3	3	1	2	2	2	4	2	3	1	2.375	0.806226	0.339463	38	36.0_40.0	0.26069	0.617092	Medium variability
OG0000805	2	2	2	2	2	3	1	8	2	2	1	3	2	2	2	2	2.375	1.5864	0.667958	38	36.0_40.0	0.26069	0.617092	High variability
OG0000806	1	2	3	1	4	2	1	2	2	2	2	2	4	5	4	1	2.375	1.25831	0.529813	38	36.0_40.0	0.26069	0.617092	Medium variability
OG0000807	2	3	3	3	2	2	3	1	2	2	3	3	2	3	2	2	2.375	0.619139	0.26069	38	36.0_40.0	0.26069	0.617092	Medium variability
OG0000808	2	2	2	2	2	3	3	2	3	2	0	4	2	2	4	3	2.375	0.957427	0.403127	38	36.0_40.0	0.26069	0.617092	Medium variability
OG0000809	2	2	2	3	2	3	1	3	2	2	4	2	3	3	3	1	2.375	0.806226	0.339463	38	36.0_40.0	0.26069	0.617092	Medium variability
OG0000810	2	2	2	3	1	3	3	4	2	2	3	3	3	2	2	1	2.375	0.806226	0.339463	38	36.0_40.0	0.26069	0.617092	Medium variability
OG0000811	3	2	3	3	1	2	2	3	2	2	2	3	2	3	2	3	2.375	0.619139	0.26069	38	36.0_40.0	0.26069	0.617092	Medium variability
OG0000812	1	2	4	2	3	1	2	2	3	3	4	2	1	3	3	2	2.375	0.957427	0.403127	38	36.0_40.0	0.26069	0.617092	Medium variability
OG0000813	1	0	3	3	3	1	4	0	3	3	3	2	5	4	3	0	2.375	1.5438	0.650023	38	36.0_40.0	0.26069	0.617092	High variability
OG0000814	2	2	2	4	3	2	2	2	2	2	2	3	3	2	3	2	2.375	0.619139	0.26069	38	36.0_40.0	0.26069	0.617092	Medium variability
OG0000815	1	2	3	3	1	4	2	3	3	3	4	1	3	2	2	1	2.375	1.0247	0.431451	38	36.0_40.0	0.26069	0.617092	Medium variability
OG0000816	1	2	2	3	2	2	3	3	2	3	3	2	2	5	2	1	2.375	0.957427	0.403127	38	36.0_40.0	0.26069	0.617092	Medium variability
OG0000817	2	2	2	2	4	3	2	2	2	4	3	1	1	3	2	3	2.375	0.885061	0.372657	38	36.0_40.0	0.26069	0.617092	Medium variability
OG0000818	4	1	2	2	3	2	2	2	2	2	3	3	3	2	2	2	2.3125	0.704154	0.304499	37	36.0_40.0	0.26069	0.617092	Medium variability
OG0000819	5	2	3	2	1	2	1	3	2	0	5	0	0	3	2	6	2.3125	1.81544	0.785056	37	36.0_40.0	0.26069	0.617092	High variability
OG0000820	3	2	3	3	2	2	1	4	2	2	2	2	2	2	3	2	2.3125	0.704154	0.304499	37	36.0_40.0	0.26069	0.617092	Medium variability
OG0000821	2	2	1	2	3	2	1	3	2	2	3	3	4	2	3	2	2.3125	0.7932	0.343006	37	36.0_40.0	0.26069	0.617092	Medium variability
OG0000822	3	3	3	2	4	2	3	1	1	3	2	3	1	3	1	2	2.3125	0.946485	0.409291	37	36.0_40.0	0.26069	0.617092	Medium variability
OG0000823	2	3	2	2	3	3	2	1	3	3	2	3	1	2	2	3	2.3125	0.704154	0.304499	37	36.0_40.0	0.26069	0.617092	Medium variability
OG0000824	3	2	1	3	3	3	1	1	4	2	3	2	3	2	3	1	2.3125	0.946485	0.409291	37	36.0_40.0	0.26069	0.617092	Medium variability
OG0000825	2	3	2	2	2	3	2	2	2	2	2	3	3	3	2	2	2.3125	0.478714	0.207011	37	36.0_40.0	0.26069	0.617092	Low variability
OG0000826	4	1	1	2	2	2	2	2	2	2	4	2	2	2	4	3	2.3125	0.946485	0.409291	37	36.0_40.0	0.26069	0.617092	Medium variability
OG0000827	4	2	4	0	1	1	2	2	4	0	3	2	0	6	2	4	2.3125	1.74045	0.752627	37	36.0_40.0	0.26069	0.617092	High variability
OG0000828	4	2	2	2	3	3	2	1	1	2	3	2	3	3	3	1	2.3125	0.873212	0.377605	37	36.0_40.0	0.26069	0.617092	Medium variability
OG0000829	3	4	5	1	1	1	2	1	2	2	5	2	1	2	2	3	2.3125	1.35247	0.584851	37	36.0_40.0	0.26069	0.617092	Medium variability
OG0000830	2	1	2	2	4	2	4	2	2	1	4	2	1	4	2	2	2.3125	1.07819	0.466246	37	36.0_40.0	0.26069	0.617092	Medium variability
OG0000831	4	1	4	2	4	1	1	1	3	1	4	2	2	3	1	3	2.3125	1.25	0.540541	37	36.0_40.0	0.26069	0.617092	Medium variability
OG0000832	2	0	2	3	2	6	1	1	3	2	3	2	1	4	0	5	2.3125	1.66208	0.718736	37	36.0_40.0	0.26069	0.617092	High variability
OG0000833	4	3	1	3	1	2	1	2	3	1	4	2	2	3	2	3	2.3125	1.01448	0.438693	37	36.0_40.0	0.26069	0.617092	Medium variability
OG0000834	3	3	2	3	2	3	0	3	2	3	1	3	1	4	2	2	2.3125	1.01448	0.438693	37	36.0_40.0	0.26069	0.617092	Medium variability
OG0000835	2	2	3	2	3	2	0	3	3	2	3	2	3	2	2	3	2.3125	0.7932	0.343006	37	36.0_40.0	0.26069	0.617092	Medium variability
OG0000836	3	1	2	1	7	3	3	0	2	0	5	2	2	3	1	2	2.3125	1.77834	0.769013	37	36.0_40.0	0.26069	0.617092	High variability
OG0000837	3	3	1	4	4	2	2	2	2	3	3	2	0	1	1	4	2.3125	1.19548	0.516963	37	36.0_40.0	0.26069	0.617092	Medium variability
OG0000838	3	2	4	3	3	2	3	2	1	1	2	2	2	4	0	3	2.3125	1.07819	0.466246	37	36.0_40.0	0.26069	0.617092	Medium variability
OG0000839	3	3	3	3	2	3	1	2	4	3	3	2	1	1	1	2	2.3125	0.946485	0.409291	37	36.0_40.0	0.26069	0.617092	Medium variability
OG0000840	4	4	4	2	3	2	1	1	2	2	3	1	1	2	2	3	2.3125	1.07819	0.466246	37	36.0_40.0	0.26069	0.617092	Medium variability
OG0000841	2	2	1	2	2	2	2	3	2	2	2	2	3	4	3	3	2.3125	0.704154	0.304499	37	36.0_40.0	0.26069	0.617092	Medium variability
OG0000842	4	4	2	1	1	1	1	7	1	1	1	1	1	3	1	7	2.3125	2.12034	0.916903	37	36.0_40.0	0.26069	0.617092	High variability
OG0000843	3	1	1	1	5	2	2	2	2	1	4	3	2	3	2	3	2.3125	1.13835	0.492258	37	36.0_40.0	0.26069	0.617092	Medium variability
OG0000844	4	2	2	2	4	2	2	3	2	2	3	2	2	2	2	1	2.3125	0.7932	0.343006	37	36.0_40.0	0.26069	0.617092	Medium variability
OG0000845	3	3	2	3	2	1	2	0	2	3	2	3	3	4	3	1	2.3125	1.01448	0.438693	37	36.0_40.0	0.26069	0.617092	Medium variability
OG0000846	5	4	1	2	3	3	1	2	1	2	3	1	2	4	1	2	2.3125	1.25	0.540541	37	36.0_40.0	0.26069	0.617092	Medium variability
OG0000847	2	2	2	2	2	2	2	5	1	2	2	3	3	3	2	2	2.3125	0.873212	0.377605	37	36.0_40.0	0.26069	0.617092	Medium variability
OG0000848	3	2	2	3	3	1	2	2	2	3	4	2	2	2	3	1	2.3125	0.7932	0.343006	37	36.0_40.0	0.26069	0.617092	Medium variability
OG0000849	2	6	3	1	3	1	2	2	1	1	2	1	2	3	5	2	2.3125	1.4477	0.626032	37	36.0_40.0	0.26069	0.617092	High variability
OG0000850	1	2	3	1	3	3	2	1	2	3	4	2	1	3	3	3	2.3125	0.946485	0.409291	37	36.0_40.0	0.26069	0.617092	Medium variability
OG0000851	2	2	2	3	3	2	2	3	2	2	4	2	2	2	2	2	2.3125	0.60208	0.260359	37	36.0_40.0	0.26069	0.617092	Low variability
OG0000852	3	4	1	2	2	2	2	2	3	2	3	2	2	2	2	3	2.3125	0.704154	0.304499	37	36.0_40.0	0.26069	0.617092	Medium variability
OG0000853	5	5	2	4	3	1	1	1	1	1	3	3	1	2	1	3	2.3125	1.4477	0.626032	37	36.0_40.0	0.26069	0.617092	High variability
OG0000854	3	2	0	1	4	2	3	1	4	2	4	3	1	2	4	1	2.3125	1.30224	0.563132	37	36.0_40.0	0.26069	0.617092	Medium variability
OG0000855	1	2	4	1	2	3	2	1	2	2	4	3	2	2	4	2	2.3125	1.01448	0.438693	37	36.0_40.0	0.26069	0.617092	Medium variability
OG0000856	4	4	2	2	5	1	2	2	1	1	3	2	2	3	1	2	2.3125	1.19548	0.516963	37	36.0_40.0	0.26069	0.617092	Medium variability
OG0000857	2	2	2	4	3	2	3	2	2	2	2	6	1	2	1	1	2.3125	1.25	0.540541	37	36.0_40.0	0.26069	0.617092	Medium variability
OG0000858	2	2	2	3	2	4	0	3	3	3	3	2	2	1	3	2	2.3125	0.946485	0.409291	37	36.0_40.0	0.26069	0.617092	Medium variability
OG0000859	3	1	4	1	3	2	2	1	4	2	3	3	2	3	2	1	2.3125	1.01448	0.438693	37	36.0_40.0	0.26069	0.617092	Medium variability
OG0000860	2	2	2	3	4	2	2	3	2	2	3	3	2	2	2	1	2.3125	0.704154	0.304499	37	36.0_40.0	0.26069	0.617092	Medium variability
OG0000861	3	3	1	2	2	2	2	2	3	3	2	3	2	3	2	2	2.3125	0.60208	0.260359	37	36.0_40.0	0.26069	0.617092	Low variability
OG0000862	2	2	4	5	1	4	1	1	3	3	1	1	1	3	2	3	2.3125	1.30224	0.563132	37	36.0_40.0	0.26069	0.617092	Medium variability
OG0000863	4	5	3	2	4	2	2	1	2	1	4	2	1	1	2	1	2.3125	1.30224	0.563132	37	36.0_40.0	0.26069	0.617092	Medium variability
OG0000864	3	1	3	1	3	2	2	2	2	4	2	3	4	3	1	1	2.3125	1.01448	0.438693	37	36.0_40.0	0.26069	0.617092	Medium variability
OG0000865	2	1	2	2	2	1	3	3	3	2	3	2	1	6	2	2	2.3125	1.19548	0.516963	37	36.0_40.0	0.26069	0.617092	Medium variability
OG0000866	4	3	3	2	1	3	3	2	3	3	1	2	1	2	2	2	2.3125	0.873212	0.377605	37	36.0_40.0	0.26069	0.617092	Medium variability
OG0000867	2	2	4	2	2	1	2	3	2	3	2	3	2	3	2	2	2.3125	0.704154	0.304499	37	36.0_40.0	0.26069	0.617092	Medium variability
OG0000868	3	2	3	2	2	3	1	4	3	2	2	2	2	2	2	2	2.3125	0.704154	0.304499	37	36.0_40.0	0.26069	0.617092	Medium variability
OG0000869	1	0	4	2	5	3	2	1	1	1	4	3	3	2	5	0	2.3125	1.62147	0.701176	37	36.0_40.0	0.26069	0.617092	High variability
OG0000870	1	2	2	1	1	2	3	3	2	2	3	2	4	2	3	4	2.3125	0.946485	0.409291	37	36.0_40.0	0.26069	0.617092	Medium variability
OG0000871	1	2	4	2	2	2	3	2	3	2	3	2	3	2	2	2	2.3125	0.704154	0.304499	37	36.0_40.0	0.26069	0.617092	Medium variability
OG0000872	3	2	3	3	2	2	1	3	2	2	1	4	0	4	3	2	2.3125	1.07819	0.466246	37	36.0_40.0	0.26069	0.617092	Medium variability
OG0000873	3	1	3	2	2	2	1	2	3	2	2	3	2	3	3	3	2.3125	0.704154	0.304499	37	36.0_40.0	0.26069	0.617092	Medium variability
OG0000874	2	1	2	3	1	2	2	3	3	4	4	2	2	3	2	1	2.3125	0.946485	0.409291	37	36.0_40.0	0.26069	0.617092	Medium variability
OG0000875	2	1	1	3	4	2	2	1	2	2	3	2	3	4	3	2	2.3125	0.946485	0.409291	37	36.0_40.0	0.26069	0.617092	Medium variability
OG0000876	4	1	1	4	2	3	3	0	2	2	2	2	3	3	5	0	2.3125	1.40089	0.605791	37	36.0_40.0	0.26069	0.617092	Medium variability
OG0000877	4	2	2	3	3	1	2	1	3	4	1	3	2	2	3	1	2.3125	1.01448	0.438693	37	36.0_40.0	0.26069	0.617092	Medium variability
OG0000878	2	1	2	2	1	5	1	2	3	2	4	2	1	5	1	3	2.3125	1.35247	0.584851	37	36.0_40.0	0.26069	0.617092	Medium variability
OG0000879	2	2	2	2	2	3	1	2	1	1	3	4	2	3	4	3	2.3125	0.946485	0.409291	37	36.0_40.0	0.26069	0.617092	Medium variability
OG0000880	1	3	2	3	2	2	2	1	3	3	3	3	2	3	3	1	2.3125	0.7932	0.343006	37	36.0_40.0	0.26069	0.617092	Medium variability
OG0000881	3	0	4	1	3	2	1	3	3	3	2	3	2	4	2	1	2.3125	1.13835	0.492258	37	36.0_40.0	0.26069	0.617092	Medium variability
OG0000882	2	4	2	2	4	3	2	1	4	2	2	2	2	2	2	1	2.3125	0.946485	0.409291	37	36.0_40.0	0.26069	0.617092	Medium variability
OG0000883	2	2	2	2	3	3	1	3	1	2	4	3	2	2	2	3	2.3125	0.7932	0.343006	37	36.0_40.0	0.26069	0.617092	Medium variability
OG0000884	1	1	2	2	2	2	2	7	2	2	1	2	3	2	2	4	2.3125	1.4477	0.626032	37	36.0_40.0	0.26069	0.617092	High variability
OG0000885	3	3	1	1	3	2	2	1	2	3	4	2	3	1	3	3	2.3125	0.946485	0.409291	37	36.0_40.0	0.26069	0.617092	Medium variability
OG0000886	2	2	3	3	2	1	2	2	2	2	2	2	4	2	3	3	2.3125	0.704154	0.304499	37	36.0_40.0	0.26069	0.617092	Medium variability
OG0000887	2	2	2	2	3	2	4	2	3	3	2	2	2	2	2	2	2.3125	0.60208	0.260359	37	36.0_40.0	0.26069	0.617092	Low variability
OG0000888	2	2	2	3	3	2	3	3	2	2	2	3	2	2	2	2	2.3125	0.478714	0.207011	37	36.0_40.0	0.26069	0.617092	Low variability
OG0000889	2	2	4	2	2	2	2	2	2	2	2	3	4	2	2	2	2.3125	0.704154	0.304499	37	36.0_40.0	0.26069	0.617092	Medium variability
OG0000890	1	3	2	1	4	3	3	1	2	1	5	1	2	4	2	2	2.3125	1.25	0.540541	37	36.0_40.0	0.26069	0.617092	Medium variability
OG0000891	0	7	2	2	2	1	0	2	4	4	1	2	1	4	3	2	2.3125	1.77834	0.769013	37	36.0_40.0	0.26069	0.617092	High variability
OG0000892	0	1	7	3	3	2	2	1	4	2	2	2	3	2	3	0	2.3125	1.66208	0.718736	37	36.0_40.0	0.26069	0.617092	High variability
OG0000893	0	1	0	0	0	0	0	34	0	1	0	1	0	0	0	0	2.3125	8.45946	3.65815	37	36.0_40.0	0.26069	0.617092	High variability
OG0000894	0	0	4	3	1	4	2	1	5	1	3	4	1	5	2	1	2.3125	1.70171	0.735877	37	36.0_40.0	0.26069	0.617092	High variability
OG0000895	3	5	5	1	1	1	2	1	4	1	1	5	1	1	2	2	2.25	1.61245	0.716645	36	36.0_40.0	0.26069	0.617092	High variability
OG0000896	2	2	2	3	3	2	3	2	2	2	3	3	2	2	2	1	2.25	0.57735	0.2566	36	36.0_40.0	0.26069	0.617092	Low variability
OG0000897	2	3	3	2	3	3	1	2	2	2	3	2	2	2	2	2	2.25	0.57735	0.2566	36	36.0_40.0	0.26069	0.617092	Low variability
OG0000898	4	2	3	3	3	3	2	2	1	1	4	1	2	2	1	2	2.25	1	0.444444	36	36.0_40.0	0.26069	0.617092	Medium variability
OG0000899	3	2	1	3	4	1	5	2	2	1	3	2	3	1	1	2	2.25	1.18322	0.525874	36	36.0_40.0	0.26069	0.617092	Medium variability
OG0000900	6	1	1	1	8	1	0	0	1	1	7	2	2	1	2	2	2.25	2.46306	1.09469	36	36.0_40.0	0.26069	0.617092	High variability
OG0000901	5	2	1	2	2	1	1	1	3	2	4	2	3	3	2	2	2.25	1.12546	0.500206	36	36.0_40.0	0.26069	0.617092	Medium variability
OG0000902	3	2	1	3	4	1	1	2	3	1	4	1	2	3	2	3	2.25	1.06458	0.473147	36	36.0_40.0	0.26069	0.617092	Medium variability
OG0000903	2	2	2	2	2	2	2	2	2	3	3	3	2	3	2	2	2.25	0.447214	0.198762	36	36.0_40.0	0.26069	0.617092	Low variability
OG0000904	3	1	2	2	3	2	2	3	2	2	3	3	2	1	3	2	2.25	0.68313	0.303613	36	36.0_40.0	0.26069	0.617092	Medium variability
OG0000905	2	4	1	2	1	1	5	4	1	1	1	1	1	4	2	5	2.25	1.57056	0.698028	36	36.0_40.0	0.26069	0.617092	High variability
OG0000906	2	2	3	2	4	3	2	1	1	2	3	3	1	2	3	2	2.25	0.856349	0.380599	36	36.0_40.0	0.26069	0.617092	Medium variability
OG0000907	5	3	1	3	3	3	2	1	2	2	2	2	2	1	2	2	2.25	1	0.444444	36	36.0_40.0	0.26069	0.617092	Medium variability
OG0000908	3	2	2	2	4	3	1	2	2	1	3	2	1	3	2	3	2.25	0.856349	0.380599	36	36.0_40.0	0.26069	0.617092	Medium variability
OG0000909	2	2	3	4	1	0	1	2	5	3	1	3	0	2	2	5	2.25	1.52753	0.6789	36	36.0_40.0	0.26069	0.617092	High variability
OG0000910	4	2	1	3	2	1	2	2	1	2	4	3	1	3	2	3	2.25	1	0.444444	36	36.0_40.0	0.26069	0.617092	Medium variability
OG0000911	1	2	1	4	7	2	1	1	2	1	5	1	2	3	2	1	2.25	1.73205	0.7698	36	36.0_40.0	0.26069	0.617092	High variability
OG0000912	1	2	3	2	3	3	2	3	2	2	2	3	2	3	1	2	2.25	0.68313	0.303613	36	36.0_40.0	0.26069	0.617092	Medium variability
OG0000913	2	2	3	2	3	2	2	2	2	3	3	3	2	2	2	1	2.25	0.57735	0.2566	36	36.0_40.0	0.26069	0.617092	Low variability
OG0000914	1	2	3	3	3	1	1	1	2	2	5	3	3	2	3	1	2.25	1.12546	0.500206	36	36.0_40.0	0.26069	0.617092	Medium variability
OG0000915	5	2	2	3	2	1	1	0	2	4	1	4	2	1	3	3	2.25	1.34164	0.596285	36	36.0_40.0	0.26069	0.617092	Medium variability
OG0000916	2	3	3	4	2	1	0	1	2	3	3	3	1	2	3	3	2.25	1.06458	0.473147	36	36.0_40.0	0.26069	0.617092	Medium variability
OG0000917	5	3	3	1	3	2	1	1	1	1	4	2	1	3	2	3	2.25	1.23828	0.550346	36	36.0_40.0	0.26069	0.617092	Medium variability
OG0000918	3	2	2	2	3	4	1	3	1	3	2	2	2	2	1	3	2.25	0.856349	0.380599	36	36.0_40.0	0.26069	0.617092	Medium variability
OG0000919	3	3	1	2	1	2	3	2	2	1	2	3	3	2	3	3	2.25	0.774597	0.344265	36	36.0_40.0	0.26069	0.617092	Medium variability
OG0000920	4	2	3	3	2	2	2	1	2	2	2	2	2	2	3	2	2.25	0.68313	0.303613	36	36.0_40.0	0.26069	0.617092	Medium variability
OG0000921	2	0	3	4	1	0	2	0	3	3	6	2	2	3	4	1	2.25	1.65328	0.734791	36	36.0_40.0	0.26069	0.617092	High variability
OG0000922	2	2	2	3	2	1	2	2	3	4	2	3	2	1	3	2	2.25	0.774597	0.344265	36	36.0_40.0	0.26069	0.617092	Medium variability
OG0000923	4	2	1	2	3	1	1	2	2	2	6	2	1	2	2	3	2.25	1.29099	0.573775	36	36.0_40.0	0.26069	0.617092	Medium variability
OG0000924	1	2	1	2	4	1	4	2	1	2	4	2	3	4	2	1	2.25	1.18322	0.525874	36	36.0_40.0	0.26069	0.617092	Medium variability
OG0000925	4	2	5	1	1	2	2	1	1	5	2	2	2	3	0	3	2.25	1.43759	0.638929	36	36.0_40.0	0.26069	0.617092	High variability
OG0000926	2	1	3	2	2	2	1	3	1	1	3	3	3	3	2	4	2.25	0.930949	0.413755	36	36.0_40.0	0.26069	0.617092	Medium variability
OG0000927	3	1	2	2	3	2	2	3	2	2	2	1	3	3	2	3	2.25	0.68313	0.303613	36	36.0_40.0	0.26069	0.617092	Medium variability
OG0000928	2	0	3	2	3	1	4	3	1	3	1	2	3	2	3	3	2.25	1.06458	0.473147	36	36.0_40.0	0.26069	0.617092	Medium variability
OG0000929	3	2	3	1	4	3	2	3	2	2	1	4	1	2	2	1	2.25	1	0.444444	36	36.0_40.0	0.26069	0.617092	Medium variability
OG0000930	2	1	2	3	2	3	2	2	3	2	2	2	3	2	3	2	2.25	0.57735	0.2566	36	36.0_40.0	0.26069	0.617092	Low variability
OG0000931	2	1	4	1	3	4	0	2	4	1	2	1	1	7	0	3	2.25	1.84391	0.819515	36	36.0_40.0	0.26069	0.617092	High variability
OG0000932	3	3	2	2	3	2	2	2	2	3	2	2	2	1	2	3	2.25	0.57735	0.2566	36	36.0_40.0	0.26069	0.617092	Low variability
OG0000933	2	2	2	2	3	2	2	2	2	2	5	2	2	2	2	2	2.25	0.774597	0.344265	36	36.0_40.0	0.26069	0.617092	Medium variability
OG0000934	3	4	3	2	3	4	2	1	4	3	2	2	0	3	0	0	2.25	1.39044	0.617975	36	36.0_40.0	0.26069	0.617092	High variability
OG0000935	3	5	2	2	2	1	1	3	1	1	2	4	2	2	2	3	2.25	1.12546	0.500206	36	36.0_40.0	0.26069	0.617092	Medium variability
OG0000936	3	2	6	1	3	1	1	2	2	2	2	3	1	2	2	3	2.25	1.23828	0.550346	36	36.0_40.0	0.26069	0.617092	Medium variability
OG0000937	3	2	3	2	4	2	2	0	1	3	3	3	1	4	2	1	2.25	1.12546	0.500206	36	36.0_40.0	0.26069	0.617092	Medium variability
OG0000938	3	2	2	1	3	2	1	2	2	4	3	2	2	4	2	1	2.25	0.930949	0.413755	36	36.0_40.0	0.26069	0.617092	Medium variability
OG0000939	2	4	2	2	2	2	2	3	2	2	2	2	2	2	2	3	2.25	0.57735	0.2566	36	36.0_40.0	0.26069	0.617092	Low variability
OG0000940	2	3	4	2	2	2	2	2	2	3	2	2	2	2	2	2	2.25	0.57735	0.2566	36	36.0_40.0	0.26069	0.617092	Low variability
OG0000941	2	4	2	2	2	2	2	2	2	1	1	3	3	3	2	3	2.25	0.774597	0.344265	36	36.0_40.0	0.26069	0.617092	Medium variability
OG0000942	2	2	3	2	2	0	1	3	2	3	2	3	3	3	3	2	2.25	0.856349	0.380599	36	36.0_40.0	0.26069	0.617092	Medium variability
OG0000943	1	2	3	3	2	2	2	1	1	3	4	3	3	2	1	3	2.25	0.930949	0.413755	36	36.0_40.0	0.26069	0.617092	Medium variability
OG0000944	1	2	4	2	3	1	2	3	3	3	2	2	1	3	3	1	2.25	0.930949	0.413755	36	36.0_40.0	0.26069	0.617092	Medium variability
OG0000945	3	2	2	2	3	3	1	4	1	1	4	1	2	2	1	4	2.25	1.12546	0.500206	36	36.0_40.0	0.26069	0.617092	Medium variability
OG0000946	2	4	2	2	3	2	2	2	2	2	2	2	2	2	2	3	2.25	0.57735	0.2566	36	36.0_40.0	0.26069	0.617092	Low variability
OG0000947	2	2	3	2	4	2	2	2	2	2	2	3	2	2	2	2	2.25	0.57735	0.2566	36	36.0_40.0	0.26069	0.617092	Low variability
OG0000948	3	3	1	2	2	1	3	1	3	2	3	2	2	3	3	2	2.25	0.774597	0.344265	36	36.0_40.0	0.26069	0.617092	Medium variability
OG0000949	3	3	3	2	4	3	1	1	1	1	5	1	1	1	3	3	2.25	1.29099	0.573775	36	36.0_40.0	0.26069	0.617092	Medium variability
OG0000950	1	2	5	3	4	3	4	3	1	1	1	1	1	2	2	2	2.25	1.29099	0.573775	36	36.0_40.0	0.26069	0.617092	Medium variability
OG0000951	3	3	2	2	3	1	2	1	2	2	3	2	3	2	3	2	2.25	0.68313	0.303613	36	36.0_40.0	0.26069	0.617092	Medium variability
OG0000952	2	2	2	3	2	2	2	3	2	2	2	2	3	2	2	3	2.25	0.447214	0.198762	36	36.0_40.0	0.26069	0.617092	Low variability
OG0000953	6	3	2	2	2	2	1	2	2	1	4	1	1	2	2	3	2.25	1.29099	0.573775	36	36.0_40.0	0.26069	0.617092	Medium variability
OG0000954	2	2	2	2	3	1	2	2	2	2	3	3	3	2	3	2	2.25	0.57735	0.2566	36	36.0_40.0	0.26069	0.617092	Low variability
OG0000955	2	0	4	2	2	0	2	2	2	2	4	1	3	2	5	3	2.25	1.34164	0.596285	36	36.0_40.0	0.26069	0.617092	Medium variability
OG0000956	4	0	1	2	4	2	2	2	2	2	4	2	1	2	3	3	2.25	1.12546	0.500206	36	36.0_40.0	0.26069	0.617092	Medium variability
OG0000957	2	1	4	2	6	2	0	1	1	2	7	2	0	4	2	0	2.25	2.04939	0.91084	36	36.0_40.0	0.26069	0.617092	High variability
OG0000958	1	1	3	2	4	2	1	1	5	3	1	1	2	3	4	2	2.25	1.29099	0.573775	36	36.0_40.0	0.26069	0.617092	Medium variability
OG0000959	3	2	2	1	4	3	4	2	2	1	2	2	2	2	1	3	2.25	0.930949	0.413755	36	36.0_40.0	0.26069	0.617092	Medium variability
OG0000960	3	1	1	4	3	1	2	1	3	3	2	2	2	2	2	4	2.25	1	0.444444	36	36.0_40.0	0.26069	0.617092	Medium variability
OG0000961	3	2	2	1	4	2	3	2	1	1	4	1	3	2	2	3	2.25	1	0.444444	36	36.0_40.0	0.26069	0.617092	Medium variability
OG0000962	2	1	3	2	4	3	2	2	2	2	3	2	3	1	2	2	2.25	0.774597	0.344265	36	36.0_40.0	0.26069	0.617092	Medium variability
OG0000963	4	1	2	2	2	2	2	4	2	2	2	2	2	2	2	3	2.25	0.774597	0.344265	36	36.0_40.0	0.26069	0.617092	Medium variability
OG0000964	2	2	4	3	2	3	1	2	3	1	1	3	1	2	3	3	2.25	0.930949	0.413755	36	36.0_40.0	0.26069	0.617092	Medium variability
OG0000965	3	3	4	3	2	2	1	2	2	1	3	1	3	2	1	3	2.25	0.930949	0.413755	36	36.0_40.0	0.26069	0.617092	Medium variability
OG0000966	2	2	2	2	2	3	2	2	2	2	2	2	4	2	2	3	2.25	0.57735	0.2566	36	36.0_40.0	0.26069	0.617092	Low variability
OG0000967	2	2	2	2	5	2	2	3	2	2	4	1	2	2	1	2	2.25	1	0.444444	36	36.0_40.0	0.26069	0.617092	Medium variability
OG0000968	2	2	1	3	1	3	2	3	3	2	3	3	2	1	2	3	2.25	0.774597	0.344265	36	36.0_40.0	0.26069	0.617092	Medium variability
OG0000969	4	2	3	2	4	2	2	0	3	3	3	2	1	2	2	1	2.25	1.06458	0.473147	36	36.0_40.0	0.26069	0.617092	Medium variability
OG0000970	2	2	3	3	2	2	2	1	1	3	2	3	3	2	3	2	2.25	0.68313	0.303613	36	36.0_40.0	0.26069	0.617092	Medium variability
OG0000971	2	1	2	1	1	3	3	7	2	3	1	2	2	2	3	1	2.25	1.48324	0.659218	36	36.0_40.0	0.26069	0.617092	High variability
OG0000972	3	3	2	2	3	1	2	2	3	2	3	2	3	2	2	1	2.25	0.68313	0.303613	36	36.0_40.0	0.26069	0.617092	Medium variability
OG0000973	4	0	3	2	2	2	2	1	3	2	2	2	2	3	2	4	2.25	1	0.444444	36	36.0_40.0	0.26069	0.617092	Medium variability
OG0000974	3	1	2	2	3	2	2	1	3	2	2	3	3	2	3	2	2.25	0.68313	0.303613	36	36.0_40.0	0.26069	0.617092	Medium variability
OG0000975	3	1	2	1	5	3	1	2	2	3	4	1	1	2	3	2	2.25	1.18322	0.525874	36	36.0_40.0	0.26069	0.617092	Medium variability
OG0000976	1	3	2	3	2	2	3	2	2	1	2	3	2	3	3	2	2.25	0.68313	0.303613	36	36.0_40.0	0.26069	0.617092	Medium variability
OG0000977	1	3	2	2	2	2	2	3	2	2	4	2	1	2	2	4	2.25	0.856349	0.380599	36	36.0_40.0	0.26069	0.617092	Medium variability
OG0000978	2	4	4	4	5	2	2	2	2	1	1	1	2	1	1	2	2.25	1.29099	0.573775	36	36.0_40.0	0.26069	0.617092	Medium variability
OG0000979	4	5	2	2	1	2	3	2	2	2	3	1	1	1	1	4	2.25	1.23828	0.550346	36	36.0_40.0	0.26069	0.617092	Medium variability
OG0000980	2	3	2	1	5	3	2	1	2	2	4	1	3	2	2	1	2.25	1.12546	0.500206	36	36.0_40.0	0.26069	0.617092	Medium variability
OG0000981	3	3	3	2	3	2	2	0	2	2	3	3	1	3	2	2	2.25	0.856349	0.380599	36	36.0_40.0	0.26069	0.617092	Medium variability
OG0000982	4	3	2	2	3	2	2	2	1	2	3	2	2	2	2	2	2.25	0.68313	0.303613	36	36.0_40.0	0.26069	0.617092	Medium variability
OG0000983	1	3	2	1	5	3	1	3	2	1	4	2	2	2	2	2	2.25	1.12546	0.500206	36	36.0_40.0	0.26069	0.617092	Medium variability
OG0000984	1	2	4	2	1	2	3	2	5	3	0	3	0	3	3	2	2.25	1.34164	0.596285	36	36.0_40.0	0.26069	0.617092	Medium variability
OG0000985	1	4	1	2	4	2	2	2	2	2	2	2	1	2	3	4	2.25	1	0.444444	36	36.0_40.0	0.26069	0.617092	Medium variability
OG0000986	1	2	4	2	4	2	2	2	3	1	3	2	3	3	1	1	2.25	1	0.444444	36	36.0_40.0	0.26069	0.617092	Medium variability
OG0000987	5	3	3	2	3	1	1	2	1	2	3	1	1	2	2	3	2.1875	1.10868	0.506824	35	32.0_36.0	0.258199	0.570053	Medium variability
OG0000988	2	1	2	2	4	1	4	1	4	1	2	3	3	2	3	0	2.1875	1.22304	0.559105	35	32.0_36.0	0.258199	0.570053	Medium variability
OG0000989	2	4	3	2	2	1	1	1	2	2	4	2	4	3	1	1	2.1875	1.10868	0.506824	35	32.0_36.0	0.258199	0.570053	Medium variability
OG0000990	4	4	2	2	1	1	2	2	1	2	2	3	2	2	2	3	2.1875	0.910586	0.416268	35	32.0_36.0	0.258199	0.570053	Medium variability
OG0000991	2	3	3	2	2	2	2	2	2	3	2	3	2	2	2	1	2.1875	0.543906	0.248643	35	32.0_36.0	0.258199	0.570053	Low variability
OG0000992	2	1	3	3	3	1	1	1	2	2	4	2	2	3	2	3	2.1875	0.910586	0.416268	35	32.0_36.0	0.258199	0.570053	Medium variability
OG0000993	4	3	1	2	2	1	1	2	1	2	3	2	2	2	6	1	2.1875	1.32759	0.606899	35	32.0_36.0	0.258199	0.570053	High variability
OG0000994	5	2	3	2	3	1	2	3	1	1	4	1	2	2	2	1	2.1875	1.16726	0.533605	35	32.0_36.0	0.258199	0.570053	Medium variability
OG0000995	2	2	2	2	3	2	2	2	2	2	3	2	2	2	2	3	2.1875	0.403113	0.18428	35	32.0_36.0	0.258199	0.570053	Low variability
OG0000996	6	2	2	2	4	1	0	2	4	1	0	2	2	1	4	2	2.1875	1.60078	0.731786	35	32.0_36.0	0.258199	0.570053	High variability
OG0000997	3	3	2	2	2	2	1	3	2	2	2	2	2	2	2	3	2.1875	0.543906	0.248643	35	32.0_36.0	0.258199	0.570053	Low variability
OG0000998	2	2	1	2	3	2	2	1	2	3	3	2	2	3	2	3	2.1875	0.655108	0.299478	35	32.0_36.0	0.258199	0.570053	Medium variability
OG0000999	2	0	1	3	4	3	2	1	1	3	2	2	3	4	3	1	2.1875	1.16726	0.533605	35	32.0_36.0	0.258199	0.570053	Medium variability
OG0001000	2	2	2	2	2	2	2	2	3	3	3	3	2	1	3	1	2.1875	0.655108	0.299478	35	32.0_36.0	0.258199	0.570053	Medium variability
OG0001001	2	1	3	2	2	2	2	3	2	2	2	3	2	3	2	2	2.1875	0.543906	0.248643	35	32.0_36.0	0.258199	0.570053	Low variability
OG0001002	2	1	3	2	2	2	2	3	1	2	3	4	2	1	2	3	2.1875	0.834166	0.381333	35	32.0_36.0	0.258199	0.570053	Medium variability
OG0001003	3	4	2	2	3	1	1	3	1	1	4	2	2	1	2	3	2.1875	1.04682	0.478547	35	32.0_36.0	0.258199	0.570053	Medium variability
OG0001004	2	3	2	2	2	2	3	3	3	2	2	4	2	0	2	1	2.1875	0.910586	0.416268	35	32.0_36.0	0.258199	0.570053	Medium variability
OG0001005	6	6	1	1	1	1	1	3	2	1	1	1	1	1	1	7	2.1875	2.136	0.976458	35	32.0_36.0	0.258199	0.570053	High variability
OG0001006	3	1	2	2	3	2	2	2	2	2	4	2	2	2	2	2	2.1875	0.655108	0.299478	35	32.0_36.0	0.258199	0.570053	Medium variability
OG0001007	3	3	2	1	3	2	2	3	2	1	3	2	2	2	3	1	2.1875	0.75	0.342857	35	32.0_36.0	0.258199	0.570053	Medium variability
OG0001008	2	2	2	2	3	2	2	2	2	3	2	2	1	2	2	4	2.1875	0.655108	0.299478	35	32.0_36.0	0.258199	0.570053	Medium variability
OG0001009	2	2	2	2	4	2	1	3	2	2	2	2	3	2	2	2	2.1875	0.655108	0.299478	35	32.0_36.0	0.258199	0.570053	Medium variability
OG0001010	2	3	4	3	1	3	2	3	1	2	3	1	2	2	1	2	2.1875	0.910586	0.416268	35	32.0_36.0	0.258199	0.570053	Medium variability
OG0001011	1	2	3	1	5	2	2	1	5	1	3	2	2	1	1	3	2.1875	1.32759	0.606899	35	32.0_36.0	0.258199	0.570053	High variability
OG0001012	4	3	2	2	2	2	2	2	1	2	4	2	2	1	1	3	2.1875	0.910586	0.416268	35	32.0_36.0	0.258199	0.570053	Medium variability
OG0001013	2	1	3	2	1	3	3	3	2	3	1	2	4	2	2	1	2.1875	0.910586	0.416268	35	32.0_36.0	0.258199	0.570053	Medium variability
OG0001014	3	3	2	3	2	3	1	3	2	2	2	1	3	2	2	1	2.1875	0.75	0.342857	35	32.0_36.0	0.258199	0.570053	Medium variability
OG0001015	2	4	2	2	3	1	2	1	2	1	4	2	2	2	2	3	2.1875	0.910586	0.416268	35	32.0_36.0	0.258199	0.570053	Medium variability
OG0001016	2	1	3	3	3	1	2	1	2	3	3	4	2	2	1	2	2.1875	0.910586	0.416268	35	32.0_36.0	0.258199	0.570053	Medium variability
OG0001017	2	2	2	4	3	1	2	2	4	1	2	4	2	1	2	1	2.1875	1.04682	0.478547	35	32.0_36.0	0.258199	0.570053	Medium variability
OG0001018	5	2	2	1	2	2	2	2	1	3	2	2	2	2	1	4	2.1875	1.04682	0.478547	35	32.0_36.0	0.258199	0.570053	Medium variability
OG0001019	4	3	1	3	3	2	3	1	2	1	2	2	1	3	3	1	2.1875	0.981071	0.44849	35	32.0_36.0	0.258199	0.570053	Medium variability
OG0001020	2	2	4	3	2	2	2	2	2	2	2	2	2	1	2	3	2.1875	0.655108	0.299478	35	32.0_36.0	0.258199	0.570053	Medium variability
OG0001021	2	3	4	1	3	1	2	1	1	1	4	3	1	3	3	2	2.1875	1.10868	0.506824	35	32.0_36.0	0.258199	0.570053	Medium variability
OG0001022	3	4	2	2	2	2	2	1	1	2	3	2	2	2	2	3	2.1875	0.75	0.342857	35	32.0_36.0	0.258199	0.570053	Medium variability
OG0001023	4	1	2	1	3	1	2	2	3	1	2	3	2	3	2	3	2.1875	0.910586	0.416268	35	32.0_36.0	0.258199	0.570053	Medium variability
OG0001024	2	2	3	3	2	2	2	2	2	3	2	2	2	3	1	2	2.1875	0.543906	0.248643	35	32.0_36.0	0.258199	0.570053	Low variability
OG0001025	2	2	1	2	4	1	2	3	2	2	2	1	1	3	3	4	2.1875	0.981071	0.44849	35	32.0_36.0	0.258199	0.570053	Medium variability
OG0001026	2	2	1	2	4	3	1	2	2	2	2	3	3	2	3	1	2.1875	0.834166	0.381333	35	32.0_36.0	0.258199	0.570053	Medium variability
OG0001027	3	3	3	2	2	1	2	1	2	1	3	2	3	2	2	3	2.1875	0.75	0.342857	35	32.0_36.0	0.258199	0.570053	Medium variability
OG0001028	1	2	3	2	3	1	2	1	3	4	2	2	1	3	3	2	2.1875	0.910586	0.416268	35	32.0_36.0	0.258199	0.570053	Medium variability
OG0001029	2	2	2	2	2	2	2	4	2	2	2	2	3	2	2	2	2.1875	0.543906	0.248643	35	32.0_36.0	0.258199	0.570053	Low variability
OG0001030	2	1	8	0	2	3	2	2	3	2	3	0	1	2	1	3	2.1875	1.83371	0.838268	35	32.0_36.0	0.258199	0.570053	High variability
OG0001031	4	2	2	2	3	2	3	2	1	2	2	1	3	2	2	2	2.1875	0.75	0.342857	35	32.0_36.0	0.258199	0.570053	Medium variability
OG0001032	4	2	1	2	2	2	2	4	2	2	2	2	2	2	2	2	2.1875	0.75	0.342857	35	32.0_36.0	0.258199	0.570053	Medium variability
OG0001033	3	2	2	2	3	2	2	1	2	2	3	2	2	2	3	2	2.1875	0.543906	0.248643	35	32.0_36.0	0.258199	0.570053	Low variability
OG0001034	3	1	3	2	3	2	2	1	2	2	3	1	3	2	2	3	2.1875	0.75	0.342857	35	32.0_36.0	0.258199	0.570053	Medium variability
OG0001035	2	2	2	2	2	2	4	2	2	2	2	2	3	2	2	2	2.1875	0.543906	0.248643	35	32.0_36.0	0.258199	0.570053	Low variability
OG0001036	5	2	2	2	2	2	2	2	2	2	1	2	2	3	1	3	2.1875	0.910586	0.416268	35	32.0_36.0	0.258199	0.570053	Medium variability
OG0001037	4	2	2	1	2	3	2	2	2	4	2	2	2	1	2	2	2.1875	0.834166	0.381333	35	32.0_36.0	0.258199	0.570053	Medium variability
OG0001038	2	2	1	2	2	2	2	2	2	3	3	3	3	4	1	1	2.1875	0.834166	0.381333	35	32.0_36.0	0.258199	0.570053	Medium variability
OG0001039	3	2	2	1	5	1	2	3	3	3	2	3	2	1	1	1	2.1875	1.10868	0.506824	35	32.0_36.0	0.258199	0.570053	Medium variability
OG0001040	3	1	1	2	3	2	1	3	2	3	5	1	1	2	3	2	2.1875	1.10868	0.506824	35	32.0_36.0	0.258199	0.570053	Medium variability
OG0001041	3	3	2	2	2	2	3	4	1	2	2	2	2	1	2	2	2.1875	0.75	0.342857	35	32.0_36.0	0.258199	0.570053	Medium variability
OG0001042	3	4	3	1	2	2	2	1	2	2	2	2	2	2	2	3	2.1875	0.75	0.342857	35	32.0_36.0	0.258199	0.570053	Medium variability
OG0001043	2	3	1	3	3	2	3	2	2	2	2	2	2	2	2	2	2.1875	0.543906	0.248643	35	32.0_36.0	0.258199	0.570053	Low variability
OG0001044	2	3	3	2	2	2	2	2	2	2	3	2	2	2	2	2	2.1875	0.403113	0.18428	35	32.0_36.0	0.258199	0.570053	Low variability
OG0001045	2	2	1	1	4	1	2	1	2	1	3	2	2	4	2	5	2.1875	1.22304	0.559105	35	32.0_36.0	0.258199	0.570053	Medium variability
OG0001046	3	1	1	1	4	1	1	2	2	3	5	2	2	4	1	2	2.1875	1.27639	0.583492	35	32.0_36.0	0.258199	0.570053	High variability
OG0001047	3	2	3	1	2	1	1	3	2	3	3	3	3	0	3	2	2.1875	0.981071	0.44849	35	32.0_36.0	0.258199	0.570053	Medium variability
OG0001048	3	1	2	2	3	1	3	3	3	1	2	3	2	3	2	1	2.1875	0.834166	0.381333	35	32.0_36.0	0.258199	0.570053	Medium variability
OG0001049	3	3	2	2	2	2	1	3	2	2	1	3	2	2	3	2	2.1875	0.655108	0.299478	35	32.0_36.0	0.258199	0.570053	Medium variability
OG0001050	2	3	3	2	2	2	3	2	3	2	2	2	1	3	1	2	2.1875	0.655108	0.299478	35	32.0_36.0	0.258199	0.570053	Medium variability
OG0001051	1	0	2	5	2	1	0	3	2	3	4	1	0	8	3	0	2.1875	2.16699	0.990623	35	32.0_36.0	0.258199	0.570053	High variability
OG0001052	3	1	3	1	2	2	1	3	3	2	2	3	2	2	3	2	2.1875	0.75	0.342857	35	32.0_36.0	0.258199	0.570053	Medium variability
OG0001053	2	3	2	2	3	2	1	1	2	2	5	2	2	2	2	2	2.1875	0.910586	0.416268	35	32.0_36.0	0.258199	0.570053	Medium variability
OG0001054	4	1	1	2	2	4	3	1	2	1	3	2	2	4	2	1	2.1875	1.10868	0.506824	35	32.0_36.0	0.258199	0.570053	Medium variability
OG0001055	2	2	3	1	2	2	2	2	2	2	4	2	3	2	3	1	2.1875	0.75	0.342857	35	32.0_36.0	0.258199	0.570053	Medium variability
OG0001056	1	2	2	2	3	4	3	1	2	2	1	4	1	3	3	1	2.1875	1.04682	0.478547	35	32.0_36.0	0.258199	0.570053	Medium variability
OG0001057	2	3	3	3	1	2	2	2	2	2	2	2	2	2	2	3	2.1875	0.543906	0.248643	35	32.0_36.0	0.258199	0.570053	Low variability
OG0001058	2	3	2	2	2	2	3	3	2	2	3	2	1	3	3	0	2.1875	0.834166	0.381333	35	32.0_36.0	0.258199	0.570053	Medium variability
OG0001059	3	2	2	2	2	2	2	2	2	2	3	2	2	2	2	3	2.1875	0.403113	0.18428	35	32.0_36.0	0.258199	0.570053	Low variability
OG0001060	2	2	3	2	1	2	2	3	2	2	2	2	3	2	3	2	2.1875	0.543906	0.248643	35	32.0_36.0	0.258199	0.570053	Low variability
OG0001061	2	2	2	3	2	2	3	3	2	2	2	2	1	2	4	1	2.1875	0.75	0.342857	35	32.0_36.0	0.258199	0.570053	Medium variability
OG0001062	2	0	2	3	3	3	3	1	1	3	4	3	2	2	2	1	2.1875	1.04682	0.478547	35	32.0_36.0	0.258199	0.570053	Medium variability
OG0001063	3	1	2	3	1	3	3	1	1	3	2	4	2	3	2	1	2.1875	0.981071	0.44849	35	32.0_36.0	0.258199	0.570053	Medium variability
OG0001064	2	3	1	2	2	2	2	1	2	1	4	2	2	2	3	4	2.1875	0.910586	0.416268	35	32.0_36.0	0.258199	0.570053	Medium variability
OG0001065	2	3	1	1	4	2	2	2	2	1	4	3	2	2	1	3	2.1875	0.981071	0.44849	35	32.0_36.0	0.258199	0.570053	Medium variability
OG0001066	3	2	3	1	4	2	1	2	4	2	2	3	2	2	0	2	2.1875	1.04682	0.478547	35	32.0_36.0	0.258199	0.570053	Medium variability
OG0001067	2	1	1	3	2	1	1	4	2	2	2	4	3	2	3	2	2.1875	0.981071	0.44849	35	32.0_36.0	0.258199	0.570053	Medium variability
OG0001068	2	1	2	2	3	4	5	2	3	1	1	1	3	3	1	1	2.1875	1.22304	0.559105	35	32.0_36.0	0.258199	0.570053	Medium variability
OG0001069	2	1	3	3	2	2	2	2	1	2	2	4	3	2	3	1	2.1875	0.834166	0.381333	35	32.0_36.0	0.258199	0.570053	Medium variability
OG0001070	2	3	2	2	1	2	2	3	2	2	1	2	2	4	3	2	2.1875	0.75	0.342857	35	32.0_36.0	0.258199	0.570053	Medium variability
OG0001071	2	4	2	1	2	1	1	2	2	5	1	1	3	1	3	4	2.1875	1.27639	0.583492	35	32.0_36.0	0.258199	0.570053	High variability
OG0001072	3	2	2	2	1	3	2	2	3	2	3	2	2	2	3	1	2.1875	0.655108	0.299478	35	32.0_36.0	0.258199	0.570053	Medium variability
OG0001073	3	2	2	3	3	1	1	1	3	3	3	2	2	2	2	2	2.1875	0.75	0.342857	35	32.0_36.0	0.258199	0.570053	Medium variability
OG0001074	2	3	2	1	4	2	2	1	2	1	5	2	2	2	2	2	2.1875	1.04682	0.478547	35	32.0_36.0	0.258199	0.570053	Medium variability
OG0001075	2	2	2	2	4	2	1	2	2	2	2	2	2	3	2	3	2.1875	0.655108	0.299478	35	32.0_36.0	0.258199	0.570053	Medium variability
OG0001076	3	2	2	2	3	2	1	2	2	2	2	2	2	3	2	3	2.1875	0.543906	0.248643	35	32.0_36.0	0.258199	0.570053	Low variability
OG0001077	3	3	2	2	2	2	2	2	2	2	2	2	2	2	2	3	2.1875	0.403113	0.18428	35	32.0_36.0	0.258199	0.570053	Low variability
OG0001078	2	4	2	3	2	2	1	2	2	2	4	1	2	2	1	3	2.1875	0.910586	0.416268	35	32.0_36.0	0.258199	0.570053	Medium variability
OG0001079	3	3	4	2	3	3	2	1	3	1	2	0	2	2	1	3	2.1875	1.04682	0.478547	35	32.0_36.0	0.258199	0.570053	Medium variability
OG0001080	2	3	2	1	4	1	1	3	1	1	5	2	3	2	2	2	2.1875	1.16726	0.533605	35	32.0_36.0	0.258199	0.570053	Medium variability
OG0001081	2	2	3	2	4	2	2	1	2	2	4	1	2	2	2	2	2.1875	0.834166	0.381333	35	32.0_36.0	0.258199	0.570053	Medium variability
OG0001082	2	2	1	2	2	3	2	3	1	3	2	3	3	2	3	1	2.1875	0.75	0.342857	35	32.0_36.0	0.258199	0.570053	Medium variability
OG0001083	2	3	2	1	3	3	1	1	3	3	1	2	3	2	2	3	2.1875	0.834166	0.381333	35	32.0_36.0	0.258199	0.570053	Medium variability
OG0001084	2	2	1	3	2	2	1	1	2	2	2	3	4	2	4	2	2.1875	0.910586	0.416268	35	32.0_36.0	0.258199	0.570053	Medium variability
OG0001085	1	4	4	1	1	3	0	7	4	1	3	1	1	1	2	1	2.1875	1.83371	0.838268	35	32.0_36.0	0.258199	0.570053	High variability
OG0001086	2	3	3	3	3	1	2	2	2	2	2	2	2	1	3	2	2.1875	0.655108	0.299478	35	32.0_36.0	0.258199	0.570053	Medium variability
OG0001087	1	2	2	1	4	2	3	3	1	2	2	0	2	3	5	2	2.1875	1.22304	0.559105	35	32.0_36.0	0.258199	0.570053	Medium variability
OG0001088	2	3	2	2	3	4	2	0	1	1	4	3	2	1	2	3	2.1875	1.10868	0.506824	35	32.0_36.0	0.258199	0.570053	Medium variability
OG0001089	2	2	2	2	3	2	2	3	2	2	2	2	2	2	3	2	2.1875	0.403113	0.18428	35	32.0_36.0	0.258199	0.570053	Low variability
OG0001090	2	2	4	2	1	2	1	2	2	1	2	2	4	3	3	2	2.1875	0.910586	0.416268	35	32.0_36.0	0.258199	0.570053	Medium variability
OG0001091	2	4	2	2	2	2	2	2	2	2	3	2	2	2	2	2	2.1875	0.543906	0.248643	35	32.0_36.0	0.258199	0.570053	Low variability
OG0001092	2	2	2	3	1	3	2	2	2	2	1	3	3	2	3	2	2.1875	0.655108	0.299478	35	32.0_36.0	0.258199	0.570053	Medium variability
OG0001093	3	1	2	3	4	3	1	1	2	2	3	2	2	2	3	1	2.1875	0.910586	0.416268	35	32.0_36.0	0.258199	0.570053	Medium variability
OG0001094	1	4	4	2	2	0	3	2	4	2	1	1	1	3	1	4	2.1875	1.32759	0.606899	35	32.0_36.0	0.258199	0.570053	High variability
OG0001095	1	3	2	2	4	2	2	3	2	2	2	2	2	2	2	2	2.1875	0.655108	0.299478	35	32.0_36.0	0.258199	0.570053	Medium variability
OG0001096	2	2	3	3	2	2	2	3	1	2	3	2	3	1	2	2	2.1875	0.655108	0.299478	35	32.0_36.0	0.258199	0.570053	Medium variability
OG0001097	1	1	2	0	5	3	3	2	1	3	3	3	1	2	3	2	2.1875	1.22304	0.559105	35	32.0_36.0	0.258199	0.570053	Medium variability
OG0001098	2	3	2	3	5	1	2	2	1	2	2	2	2	2	2	2	2.1875	0.910586	0.416268	35	32.0_36.0	0.258199	0.570053	Medium variability
OG0001099	2	2	2	4	3	2	1	1	2	3	5	2	1	1	2	2	2.1875	1.10868	0.506824	35	32.0_36.0	0.258199	0.570053	Medium variability
OG0001100	2	2	2	2	2	2	3	1	2	2	3	2	2	2	2	4	2.1875	0.655108	0.299478	35	32.0_36.0	0.258199	0.570053	Medium variability
OG0001101	1	1	3	3	2	2	2	3	3	3	3	3	2	1	2	1	2.1875	0.834166	0.381333	35	32.0_36.0	0.258199	0.570053	Medium variability
OG0001102	1	4	2	2	2	2	2	3	2	1	4	3	2	2	2	1	2.1875	0.910586	0.416268	35	32.0_36.0	0.258199	0.570053	Medium variability
OG0001103	0	3	5	2	1	3	0	2	5	7	0	1	0	2	3	1	2.1875	2.07264	0.947492	35	32.0_36.0	0.258199	0.570053	High variability
OG0001105	2	3	2	2	3	1	0	3	3	3	0	2	3	3	2	2	2.125	1.0247	0.482209	34	32.0_36.0	0.258199	0.570053	Medium variability
OG0001106	4	2	1	1	3	1	4	2	3	3	3	0	1	1	3	2	2.125	1.20416	0.566663	34	32.0_36.0	0.258199	0.570053	Medium variability
OG0001107	1	1	2	3	2	0	0	1	2	3	2	3	1	9	4	0	2.125	2.18708	1.02922	34	32.0_36.0	0.258199	0.570053	High variability
OG0001108	5	2	1	1	3	1	3	2	1	2	5	2	2	1	2	1	2.125	1.31022	0.616572	34	32.0_36.0	0.258199	0.570053	High variability
OG0001109	3	2	1	2	3	1	2	4	1	2	4	1	5	1	1	1	2.125	1.31022	0.616572	34	32.0_36.0	0.258199	0.570053	High variability
OG0001110	3	2	0	3	6	1	2	1	1	1	6	3	2	1	1	1	2.125	1.74642	0.821847	34	32.0_36.0	0.258199	0.570053	High variability
OG0001111	6	3	3	0	2	3	0	3	5	0	4	3	0	0	0	2	2.125	1.96214	0.923361	34	32.0_36.0	0.258199	0.570053	High variability
OG0001112	2	2	3	2	3	1	3	2	2	2	2	2	1	1	2	4	2.125	0.806226	0.3794	34	32.0_36.0	0.258199	0.570053	Medium variability
OG0001113	2	0	4	2	3	2	2	2	2	2	3	2	2	5	0	1	2.125	1.25831	0.592144	34	32.0_36.0	0.258199	0.570053	High variability
OG0001114	2	2	3	2	2	2	2	3	2	2	2	2	2	2	2	2	2.125	0.341565	0.160736	34	32.0_36.0	0.258199	0.570053	Low variability
OG0001115	2	3	2	2	2	2	2	1	3	2	2	3	2	2	2	2	2.125	0.5	0.235294	34	32.0_36.0	0.258199	0.570053	Low variability
OG0001116	2	2	2	2	2	2	2	4	2	2	2	2	2	2	2	2	2.125	0.5	0.235294	34	32.0_36.0	0.258199	0.570053	Low variability
OG0001117	3	2	3	1	2	2	2	2	3	2	2	2	2	2	2	2	2.125	0.5	0.235294	34	32.0_36.0	0.258199	0.570053	Low variability
OG0001118	3	2	4	3	1	3	2	1	0	2	2	2	2	2	2	3	2.125	0.957427	0.450554	34	32.0_36.0	0.258199	0.570053	Medium variability
OG0001119	6	1	1	3	2	3	1	2	1	2	2	2	3	2	2	1	2.125	1.25831	0.592144	34	32.0_36.0	0.258199	0.570053	High variability
OG0001120	2	1	2	2	3	3	3	1	2	2	3	2	2	3	2	1	2.125	0.718795	0.338257	34	32.0_36.0	0.258199	0.570053	Medium variability
OG0001121	4	2	1	2	1	2	2	2	2	2	4	3	1	2	2	2	2.125	0.885061	0.416499	34	32.0_36.0	0.258199	0.570053	Medium variability
OG0001122	2	2	2	2	2	3	1	2	2	2	2	2	2	2	2	4	2.125	0.619139	0.29136	34	32.0_36.0	0.258199	0.570053	Medium variability
OG0001123	2	4	2	2	2	2	2	3	2	1	2	2	2	1	2	3	2.125	0.718795	0.338257	34	32.0_36.0	0.258199	0.570053	Medium variability
OG0001124	2	2	2	2	2	2	3	2	2	2	3	2	2	2	2	2	2.125	0.341565	0.160736	34	32.0_36.0	0.258199	0.570053	Low variability
OG0001125	2	2	2	2	2	2	2	2	2	2	3	2	2	2	3	2	2.125	0.341565	0.160736	34	32.0_36.0	0.258199	0.570053	Low variability
OG0001126	2	1	2	2	2	2	2	2	2	2	4	2	2	1	2	4	2.125	0.806226	0.3794	34	32.0_36.0	0.258199	0.570053	Medium variability
OG0001127	2	3	4	1	2	2	4	1	1	1	5	1	3	2	1	1	2.125	1.31022	0.616572	34	32.0_36.0	0.258199	0.570053	High variability
OG0001128	3	1	2	2	2	3	2	2	1	2	5	1	1	2	2	3	2.125	1.0247	0.482209	34	32.0_36.0	0.258199	0.570053	Medium variability
OG0001129	3	4	3	2	2	1	1	1	2	1	3	2	2	2	2	3	2.125	0.885061	0.416499	34	32.0_36.0	0.258199	0.570053	Medium variability
OG0001130	2	3	1	2	2	2	3	3	3	1	2	1	2	3	2	2	2.125	0.718795	0.338257	34	32.0_36.0	0.258199	0.570053	Medium variability
OG0001131	2	1	3	2	2	2	3	2	2	1	4	1	2	2	3	2	2.125	0.806226	0.3794	34	32.0_36.0	0.258199	0.570053	Medium variability
OG0001132	4	3	2	2	2	2	2	1	2	2	2	2	2	2	2	2	2.125	0.619139	0.29136	34	32.0_36.0	0.258199	0.570053	Medium variability
OG0001133	2	1	2	2	2	2	2	3	2	2	2	3	3	2	2	2	2.125	0.5	0.235294	34	32.0_36.0	0.258199	0.570053	Low variability
OG0001134	2	4	2	2	3	4	1	2	2	1	2	1	2	2	2	2	2.125	0.885061	0.416499	34	32.0_36.0	0.258199	0.570053	Medium variability
OG0001135	2	3	2	2	3	3	2	1	2	2	2	2	2	3	2	1	2.125	0.619139	0.29136	34	32.0_36.0	0.258199	0.570053	Medium variability
OG0001136	4	3	3	1	2	1	1	1	3	1	7	0	4	1	0	2	2.125	1.82117	0.857022	34	32.0_36.0	0.258199	0.570053	High variability
OG0001137	3	1	1	2	3	1	2	3	2	1	3	3	3	1	2	3	2.125	0.885061	0.416499	34	32.0_36.0	0.258199	0.570053	Medium variability
OG0001138	2	2	2	4	3	1	2	2	2	2	3	1	1	2	2	3	2.125	0.806226	0.3794	34	32.0_36.0	0.258199	0.570053	Medium variability
OG0001139	4	2	2	3	2	1	1	1	3	1	3	2	2	2	3	2	2.125	0.885061	0.416499	34	32.0_36.0	0.258199	0.570053	Medium variability
OG0001140	1	1	2	3	3	2	2	3	2	3	1	1	2	2	3	3	2.125	0.806226	0.3794	34	32.0_36.0	0.258199	0.570053	Medium variability
OG0001141	3	2	2	2	2	2	2	2	2	3	2	2	2	2	2	2	2.125	0.341565	0.160736	34	32.0_36.0	0.258199	0.570053	Low variability
OG0001142	4	4	2	2	2	1	2	2	2	2	1	2	2	2	2	2	2.125	0.806226	0.3794	34	32.0_36.0	0.258199	0.570053	Medium variability
OG0001143	3	1	1	2	3	1	3	2	2	1	4	1	3	1	4	2	2.125	1.08781	0.511911	34	32.0_36.0	0.258199	0.570053	Medium variability
OG0001144	4	2	3	2	2	3	2	2	1	2	1	2	3	1	3	1	2.125	0.885061	0.416499	34	32.0_36.0	0.258199	0.570053	Medium variability
OG0001145	2	2	2	3	2	3	1	2	2	2	2	2	2	2	2	3	2.125	0.5	0.235294	34	32.0_36.0	0.258199	0.570053	Low variability
OG0001146	2	3	3	2	1	1	3	2	3	3	1	1	2	2	3	2	2.125	0.806226	0.3794	34	32.0_36.0	0.258199	0.570053	Medium variability
OG0001147	1	4	3	2	2	1	0	5	2	4	4	0	0	3	0	3	2.125	1.66833	0.785098	34	32.0_36.0	0.258199	0.570053	High variability
OG0001148	2	2	1	2	2	3	2	2	2	2	3	2	2	2	2	3	2.125	0.5	0.235294	34	32.0_36.0	0.258199	0.570053	Low variability
OG0001149	3	3	1	2	4	2	0	1	2	1	3	3	2	3	1	3	2.125	1.08781	0.511911	34	32.0_36.0	0.258199	0.570053	Medium variability
OG0001150	3	2	2	3	2	2	1	2	1	3	2	3	2	1	3	2	2.125	0.718795	0.338257	34	32.0_36.0	0.258199	0.570053	Medium variability
OG0001151	2	3	2	3	2	2	1	1	2	3	4	1	2	3	1	2	2.125	0.885061	0.416499	34	32.0_36.0	0.258199	0.570053	Medium variability
OG0001152	3	2	2	1	4	2	2	2	3	3	1	2	0	1	3	3	2.125	1.0247	0.482209	34	32.0_36.0	0.258199	0.570053	Medium variability
OG0001153	4	1	1	2	3	1	2	1	2	2	4	2	1	4	2	2	2.125	1.08781	0.511911	34	32.0_36.0	0.258199	0.570053	Medium variability
OG0001154	2	2	2	3	4	2	2	1	2	2	3	2	2	2	2	1	2.125	0.718795	0.338257	34	32.0_36.0	0.258199	0.570053	Medium variability
OG0001155	5	1	2	1	3	2	3	1	1	1	7	2	1	2	1	1	2.125	1.70783	0.803682	34	32.0_36.0	0.258199	0.570053	High variability
OG0001156	2	2	4	2	2	2	2	2	2	2	2	2	2	2	2	2	2.125	0.5	0.235294	34	32.0_36.0	0.258199	0.570053	Low variability
OG0001157	3	2	5	2	2	2	2	2	2	2	2	1	1	2	2	2	2.125	0.885061	0.416499	34	32.0_36.0	0.258199	0.570053	Medium variability
OG0001158	3	2	2	1	3	1	2	3	2	2	2	2	2	3	3	1	2.125	0.718795	0.338257	34	32.0_36.0	0.258199	0.570053	Medium variability
OG0001159	2	2	2	2	2	2	1	3	2	2	2	2	2	2	2	4	2.125	0.619139	0.29136	34	32.0_36.0	0.258199	0.570053	Medium variability
OG0001160	3	3	2	2	2	2	2	2	2	2	3	2	2	1	2	2	2.125	0.5	0.235294	34	32.0_36.0	0.258199	0.570053	Low variability
OG0001161	2	1	2	0	7	2	2	2	2	0	8	1	1	2	1	1	2.125	2.21736	1.04346	34	32.0_36.0	0.258199	0.570053	High variability
OG0001162	2	2	2	1	2	2	2	1	2	2	5	2	2	1	1	5	2.125	1.20416	0.566663	34	32.0_36.0	0.258199	0.570053	Medium variability
OG0001163	3	2	1	2	2	2	2	1	2	1	2	4	2	1	5	2	2.125	1.08781	0.511911	34	32.0_36.0	0.258199	0.570053	Medium variability
OG0001164	3	4	1	2	4	1	2	1	2	1	4	2	3	1	2	1	2.125	1.14746	0.539982	34	32.0_36.0	0.258199	0.570053	Medium variability
OG0001165	1	2	3	2	4	2	1	2	1	1	3	2	3	2	2	3	2.125	0.885061	0.416499	34	32.0_36.0	0.258199	0.570053	Medium variability
OG0001166	3	2	1	3	3	2	1	2	2	3	2	2	2	2	2	2	2.125	0.619139	0.29136	34	32.0_36.0	0.258199	0.570053	Medium variability
OG0001167	2	4	2	2	2	1	2	3	1	2	2	2	2	2	2	3	2.125	0.718795	0.338257	34	32.0_36.0	0.258199	0.570053	Medium variability
OG0001168	2	2	2	2	2	2	2	2	2	2	4	2	1	2	2	3	2.125	0.619139	0.29136	34	32.0_36.0	0.258199	0.570053	Medium variability
OG0001169	3	2	2	2	1	2	2	2	2	2	3	2	2	2	3	2	2.125	0.5	0.235294	34	32.0_36.0	0.258199	0.570053	Low variability
OG0001170	5	3	2	3	3	1	1	2	2	1	1	3	1	1	2	3	2.125	1.14746	0.539982	34	32.0_36.0	0.258199	0.570053	Medium variability
OG0001171	2	2	3	2	2	3	2	3	1	2	3	3	2	0	2	2	2.125	0.806226	0.3794	34	32.0_36.0	0.258199	0.570053	Medium variability
OG0001172	3	1	1	2	4	3	2	0	3	1	5	1	1	2	1	4	2.125	1.40831	0.662733	34	32.0_36.0	0.258199	0.570053	High variability
OG0001173	2	3	2	2	2	1	2	2	2	2	2	3	2	2	2	3	2.125	0.5	0.235294	34	32.0_36.0	0.258199	0.570053	Low variability
OG0001174	1	2	2	2	3	1	2	2	3	2	3	2	3	3	2	1	2.125	0.718795	0.338257	34	32.0_36.0	0.258199	0.570053	Medium variability
OG0001175	3	3	1	2	2	2	1	1	2	2	4	2	2	3	2	2	2.125	0.806226	0.3794	34	32.0_36.0	0.258199	0.570053	Medium variability
OG0001176	2	1	2	2	2	1	2	2	3	2	3	3	4	2	2	1	2.125	0.806226	0.3794	34	32.0_36.0	0.258199	0.570053	Medium variability
OG0001177	2	3	3	2	3	3	2	1	2	1	1	2	2	2	2	3	2.125	0.718795	0.338257	34	32.0_36.0	0.258199	0.570053	Medium variability
OG0001178	4	2	1	2	1	1	3	1	3	2	2	1	2	3	2	4	2.125	1.0247	0.482209	34	32.0_36.0	0.258199	0.570053	Medium variability
OG0001179	1	1	2	3	3	2	2	1	5	2	2	2	1	4	2	1	2.125	1.14746	0.539982	34	32.0_36.0	0.258199	0.570053	Medium variability
OG0001180	4	3	1	2	4	1	1	2	2	2	2	1	2	3	2	2	2.125	0.957427	0.450554	34	32.0_36.0	0.258199	0.570053	Medium variability
OG0001181	3	2	2	3	2	3	2	2	2	1	2	1	1	3	2	3	2.125	0.718795	0.338257	34	32.0_36.0	0.258199	0.570053	Medium variability
OG0001182	2	1	3	4	3	2	2	1	2	2	2	1	3	2	2	2	2.125	0.806226	0.3794	34	32.0_36.0	0.258199	0.570053	Medium variability
OG0001183	2	2	2	2	2	2	2	4	2	2	2	2	2	2	2	2	2.125	0.5	0.235294	34	32.0_36.0	0.258199	0.570053	Low variability
OG0001184	2	1	2	2	2	3	2	2	3	1	4	1	3	3	1	2	2.125	0.885061	0.416499	34	32.0_36.0	0.258199	0.570053	Medium variability
OG0001185	2	1	2	1	3	2	1	2	4	2	1	2	3	4	2	2	2.125	0.957427	0.450554	34	32.0_36.0	0.258199	0.570053	Medium variability
OG0001186	4	4	2	2	2	1	2	2	1	2	2	2	2	3	1	2	2.125	0.885061	0.416499	34	32.0_36.0	0.258199	0.570053	Medium variability
OG0001187	1	3	3	1	2	3	1	2	2	3	4	2	2	3	1	1	2.125	0.957427	0.450554	34	32.0_36.0	0.258199	0.570053	Medium variability
OG0001188	2	3	2	2	4	1	1	3	2	1	3	4	3	1	1	1	2.125	1.08781	0.511911	34	32.0_36.0	0.258199	0.570053	Medium variability
OG0001189	1	1	2	3	3	2	1	2	2	1	5	2	2	3	2	2	2.125	1.0247	0.482209	34	32.0_36.0	0.258199	0.570053	Medium variability
OG0001190	2	1	2	3	2	2	3	1	2	2	2	3	2	2	3	2	2.125	0.619139	0.29136	34	32.0_36.0	0.258199	0.570053	Medium variability
OG0001191	2	1	1	1	5	4	3	1	1	2	4	0	2	4	1	2	2.125	1.45488	0.684648	34	32.0_36.0	0.258199	0.570053	High variability
OG0001192	2	3	2	2	3	1	2	2	2	2	2	2	2	2	2	3	2.125	0.5	0.235294	34	32.0_36.0	0.258199	0.570053	Low variability
OG0001193	2	2	3	2	2	2	3	3	2	3	1	2	2	2	2	1	2.125	0.619139	0.29136	34	32.0_36.0	0.258199	0.570053	Medium variability
OG0001194	2	3	2	2	2	2	3	2	2	2	2	2	2	2	2	2	2.125	0.341565	0.160736	34	32.0_36.0	0.258199	0.570053	Low variability
OG0001195	1	1	0	2	3	2	1	5	5	2	2	1	1	2	4	2	2.125	1.45488	0.684648	34	32.0_36.0	0.258199	0.570053	High variability
OG0001196	3	1	2	3	2	2	1	3	1	3	2	2	1	3	3	2	2.125	0.806226	0.3794	34	32.0_36.0	0.258199	0.570053	Medium variability
OG0001197	5	1	1	2	1	1	0	5	2	1	0	4	1	1	4	5	2.125	1.82117	0.857022	34	32.0_36.0	0.258199	0.570053	High variability
OG0001198	2	3	2	2	2	3	1	3	2	6	2	1	1	2	1	1	2.125	1.25831	0.592144	34	32.0_36.0	0.258199	0.570053	High variability
OG0001199	2	1	2	2	4	1	5	2	1	3	3	2	1	2	1	2	2.125	1.14746	0.539982	34	32.0_36.0	0.258199	0.570053	Medium variability
OG0001200	1	2	2	3	1	2	3	1	2	3	2	2	2	2	3	3	2.125	0.718795	0.338257	34	32.0_36.0	0.258199	0.570053	Medium variability
OG0001201	1	1	3	4	2	2	3	3	2	3	3	1	2	2	1	1	2.125	0.957427	0.450554	34	32.0_36.0	0.258199	0.570053	Medium variability
OG0001202	3	3	4	3	1	2	2	1	2	1	2	2	2	2	2	2	2.125	0.806226	0.3794	34	32.0_36.0	0.258199	0.570053	Medium variability
OG0001203	2	2	3	2	2	2	1	2	3	3	2	2	1	2	3	2	2.125	0.619139	0.29136	34	32.0_36.0	0.258199	0.570053	Medium variability
OG0001204	2	3	2	3	2	2	1	0	2	2	3	3	3	2	2	2	2.125	0.806226	0.3794	34	32.0_36.0	0.258199	0.570053	Medium variability
OG0001205	1	2	1	2	2	3	2	4	1	2	4	1	2	3	2	2	2.125	0.957427	0.450554	34	32.0_36.0	0.258199	0.570053	Medium variability
OG0001206	1	3	3	1	2	2	2	4	1	1	3	1	3	3	2	2	2.125	0.957427	0.450554	34	32.0_36.0	0.258199	0.570053	Medium variability
OG0001207	2	2	3	2	2	2	2	2	2	2	2	2	2	2	2	3	2.125	0.341565	0.160736	34	32.0_36.0	0.258199	0.570053	Low variability
OG0001208	1	1	2	2	2	2	2	1	2	4	2	2	4	2	2	3	2.125	0.885061	0.416499	34	32.0_36.0	0.258199	0.570053	Medium variability
OG0001209	2	2	2	2	2	3	2	3	2	2	3	1	2	2	2	2	2.125	0.5	0.235294	34	32.0_36.0	0.258199	0.570053	Low variability
OG0001210	4	2	1	2	3	1	2	1	1	2	2	2	3	2	3	3	2.125	0.885061	0.416499	34	32.0_36.0	0.258199	0.570053	Medium variability
OG0001211	2	2	3	3	3	3	0	1	3	1	3	1	3	1	2	3	2.125	1.0247	0.482209	34	32.0_36.0	0.258199	0.570053	Medium variability
OG0001212	3	3	2	2	2	2	2	1	1	2	3	3	2	1	3	2	2.125	0.718795	0.338257	34	32.0_36.0	0.258199	0.570053	Medium variability
OG0001213	1	0	3	0	0	0	0	30	0	0	0	0	0	0	0	0	2.125	7.47329	3.51684	34	32.0_36.0	0.258199	0.570053	High variability
OG0001214	2	2	3	2	2	2	2	2	2	2	2	2	2	3	2	2	2.125	0.341565	0.160736	34	32.0_36.0	0.258199	0.570053	Low variability
OG0001215	1	2	3	1	3	2	2	5	2	3	1	2	1	3	2	1	2.125	1.08781	0.511911	34	32.0_36.0	0.258199	0.570053	Medium variability
OG0001216	2	3	2	2	2	2	2	2	2	2	2	2	2	3	2	2	2.125	0.341565	0.160736	34	32.0_36.0	0.258199	0.570053	Low variability
OG0001217	2	1	4	3	2	2	3	0	3	3	1	3	3	1	3	0	2.125	1.20416	0.566663	34	32.0_36.0	0.258199	0.570053	Medium variability
OG0001218	0	1	4	1	4	2	2	1	1	3	4	4	0	3	1	3	2.125	1.45488	0.684648	34	32.0_36.0	0.258199	0.570053	High variability
OG0001219	2	1	2	1	2	2	2	3	2	2	4	3	2	2	2	1	2.0625	0.771902	0.374256	33	32.0_36.0	0.258199	0.570053	Medium variability
OG0001220	1	1	2	2	1	3	1	4	4	4	3	2	1	1	2	1	2.0625	1.18145	0.572826	33	32.0_36.0	0.258199	0.570053	High variability
OG0001221	3	3	2	1	3	2	1	3	2	3	3	1	1	2	1	2	2.0625	0.853913	0.414018	33	32.0_36.0	0.258199	0.570053	Medium variability
OG0001222	7	3	2	1	2	4	3	2	3	0	1	0	0	1	2	2	2.0625	1.76895	0.85767	33	32.0_36.0	0.258199	0.570053	High variability
OG0001223	2	3	2	3	2	2	1	2	1	3	2	2	2	2	2	2	2.0625	0.57373	0.278172	33	32.0_36.0	0.258199	0.570053	Medium variability
OG0001224	2	1	1	2	2	2	1	2	2	1	2	4	4	2	3	2	2.0625	0.928709	0.450283	33	32.0_36.0	0.258199	0.570053	Medium variability
OG0001225	2	2	3	2	2	2	2	2	2	2	2	2	2	2	2	2	2.0625	0.25	0.121212	33	32.0_36.0	0.258199	0.570053	Low variability
OG0001226	3	3	3	1	2	2	2	1	1	5	3	1	1	0	3	2	2.0625	1.23659	0.599561	33	32.0_36.0	0.258199	0.570053	High variability
OG0001227	2	1	1	1	4	2	2	3	2	3	4	2	1	1	1	3	2.0625	1.06262	0.515211	33	32.0_36.0	0.258199	0.570053	Medium variability
OG0001228	2	2	3	2	2	1	3	3	2	1	3	2	2	1	2	2	2.0625	0.680074	0.329733	33	32.0_36.0	0.258199	0.570053	Medium variability
OG0001229	4	2	1	1	2	1	2	3	2	2	3	2	1	2	2	3	2.0625	0.853913	0.414018	33	32.0_36.0	0.258199	0.570053	Medium variability
OG0001230	3	3	1	1	2	1	2	2	2	1	4	1	2	2	3	3	2.0625	0.928709	0.450283	33	32.0_36.0	0.258199	0.570053	Medium variability
OG0001231	6	4	1	1	3	1	1	1	1	1	1	2	2	1	4	3	2.0625	1.52616	0.739957	33	32.0_36.0	0.258199	0.570053	High variability
OG0001232	1	3	3	2	3	1	1	2	2	1	1	3	2	2	3	3	2.0625	0.853913	0.414018	33	32.0_36.0	0.258199	0.570053	Medium variability
OG0001233	3	2	2	2	2	2	1	1	1	3	2	2	3	3	2	2	2.0625	0.680074	0.329733	33	32.0_36.0	0.258199	0.570053	Medium variability
OG0001234	2	1	2	2	3	2	2	1	2	2	4	2	2	2	2	2	2.0625	0.680074	0.329733	33	32.0_36.0	0.258199	0.570053	Medium variability
OG0001235	3	5	4	1	2	2	0	1	0	1	2	1	2	1	5	3	2.0625	1.56924	0.760841	33	32.0_36.0	0.258199	0.570053	High variability
OG0001236	3	3	1	2	2	2	2	3	2	2	2	2	2	1	2	2	2.0625	0.57373	0.278172	33	32.0_36.0	0.258199	0.570053	Medium variability
OG0001237	3	3	4	1	2	2	1	2	2	2	2	2	2	1	2	2	2.0625	0.771902	0.374256	33	32.0_36.0	0.258199	0.570053	Medium variability
OG0001238	1	2	3	2	2	2	3	2	2	2	1	2	2	3	2	2	2.0625	0.57373	0.278172	33	32.0_36.0	0.258199	0.570053	Medium variability
OG0001239	2	6	2	1	2	1	1	3	1	2	3	2	1	2	1	3	2.0625	1.28938	0.625154	33	32.0_36.0	0.258199	0.570053	High variability
OG0001240	4	2	2	1	2	2	2	2	1	2	2	2	2	2	3	2	2.0625	0.680074	0.329733	33	32.0_36.0	0.258199	0.570053	Medium variability
OG0001241	3	1	1	2	3	1	3	3	2	1	3	3	2	2	2	1	2.0625	0.853913	0.414018	33	32.0_36.0	0.258199	0.570053	Medium variability
OG0001242	4	1	1	2	1	1	1	1	3	1	1	5	1	1	4	5	2.0625	1.56924	0.760841	33	32.0_36.0	0.258199	0.570053	High variability
OG0001243	2	2	2	2	3	2	3	2	2	2	3	2	1	2	2	1	2.0625	0.57373	0.278172	33	32.0_36.0	0.258199	0.570053	Medium variability
OG0001244	2	2	3	2	2	2	2	2	2	2	2	2	2	2	2	2	2.0625	0.25	0.121212	33	32.0_36.0	0.258199	0.570053	Low variability
OG0001245	4	1	2	2	3	3	2	0	3	2	1	1	2	3	2	2	2.0625	0.997914	0.483837	33	32.0_36.0	0.258199	0.570053	Medium variability
OG0001246	3	4	1	1	1	2	3	1	3	2	4	2	1	1	2	2	2.0625	1.06262	0.515211	33	32.0_36.0	0.258199	0.570053	Medium variability
OG0001247	2	3	2	2	1	2	2	2	2	2	3	2	1	2	2	3	2.0625	0.57373	0.278172	33	32.0_36.0	0.258199	0.570053	Medium variability
OG0001248	2	3	1	2	4	1	2	2	2	2	2	2	2	2	2	2	2.0625	0.680074	0.329733	33	32.0_36.0	0.258199	0.570053	Medium variability
OG0001249	2	1	1	3	2	3	2	1	3	3	2	2	2	3	1	2	2.0625	0.771902	0.374256	33	32.0_36.0	0.258199	0.570053	Medium variability
OG0001250	3	3	1	2	3	2	1	2	1	1	3	2	1	3	2	3	2.0625	0.853913	0.414018	33	32.0_36.0	0.258199	0.570053	Medium variability
OG0001251	3	7	1	1	2	2	1	3	1	1	1	1	1	1	1	6	2.0625	1.87861	0.91084	33	32.0_36.0	0.258199	0.570053	High variability
OG0001252	2	2	3	2	2	2	1	2	3	1	2	3	2	2	2	2	2.0625	0.57373	0.278172	33	32.0_36.0	0.258199	0.570053	Medium variability
OG0001253	3	3	1	1	2	2	1	2	2	2	4	2	1	1	2	4	2.0625	0.997914	0.483837	33	32.0_36.0	0.258199	0.570053	Medium variability
OG0001254	3	4	2	1	4	2	1	2	2	1	3	1	2	2	1	2	2.0625	0.997914	0.483837	33	32.0_36.0	0.258199	0.570053	Medium variability
OG0001255	2	2	2	2	2	2	3	2	1	1	5	2	2	2	2	1	2.0625	0.928709	0.450283	33	32.0_36.0	0.258199	0.570053	Medium variability
OG0001256	2	2	3	2	2	3	2	1	2	2	2	2	2	2	2	2	2.0625	0.442531	0.21456	33	32.0_36.0	0.258199	0.570053	Low variability
OG0001257	3	2	3	1	2	3	2	1	2	2	2	2	3	1	2	2	2.0625	0.680074	0.329733	33	32.0_36.0	0.258199	0.570053	Medium variability
OG0001258	3	2	2	1	3	2	2	2	2	1	4	2	2	2	2	1	2.0625	0.771902	0.374256	33	32.0_36.0	0.258199	0.570053	Medium variability
OG0001259	3	1	1	4	2	1	2	2	1	1	3	3	2	2	2	3	2.0625	0.928709	0.450283	33	32.0_36.0	0.258199	0.570053	Medium variability
OG0001260	5	3	1	2	1	2	2	2	2	2	3	1	1	2	2	2	2.0625	0.997914	0.483837	33	32.0_36.0	0.258199	0.570053	Medium variability
OG0001261	1	3	2	3	1	2	3	3	3	3	1	2	2	1	2	1	2.0625	0.853913	0.414018	33	32.0_36.0	0.258199	0.570053	Medium variability
OG0001262	4	2	3	2	3	2	1	1	2	2	2	2	1	2	2	2	2.0625	0.771902	0.374256	33	32.0_36.0	0.258199	0.570053	Medium variability
OG0001263	1	1	1	3	1	2	1	4	1	3	2	3	3	2	3	2	2.0625	0.997914	0.483837	33	32.0_36.0	0.258199	0.570053	Medium variability
OG0001264	3	2	2	2	2	2	2	2	2	3	2	3	2	1	1	2	2.0625	0.57373	0.278172	33	32.0_36.0	0.258199	0.570053	Medium variability
OG0001265	2	2	2	1	3	1	5	3	1	2	4	1	1	0	2	3	2.0625	1.28938	0.625154	33	32.0_36.0	0.258199	0.570053	High variability
OG0001266	3	2	3	2	2	3	1	0	2	2	2	3	3	2	2	1	2.0625	0.853913	0.414018	33	32.0_36.0	0.258199	0.570053	Medium variability
OG0001267	2	1	6	0	0	1	3	1	2	0	6	1	6	2	1	1	2.0625	2.11246	1.02422	33	32.0_36.0	0.258199	0.570053	High variability
OG0001268	2	0	3	3	3	2	1	1	3	0	3	1	2	2	1	6	2.0625	1.48183	0.718465	33	32.0_36.0	0.258199	0.570053	High variability
OG0001269	2	2	2	2	2	2	2	2	2	2	2	2	2	2	2	3	2.0625	0.25	0.121212	33	32.0_36.0	0.258199	0.570053	Low variability
OG0001270	3	2	2	1	6	2	2	1	1	1	6	1	1	1	1	2	2.0625	1.65202	0.800979	33	32.0_36.0	0.258199	0.570053	High variability
OG0001271	3	2	2	2	2	2	1	4	2	2	2	2	1	3	1	2	2.0625	0.771902	0.374256	33	32.0_36.0	0.258199	0.570053	Medium variability
OG0001272	1	1	2	2	4	1	1	2	2	2	5	1	2	3	2	2	2.0625	1.12361	0.544781	33	32.0_36.0	0.258199	0.570053	Medium variability
OG0001273	2	3	2	2	2	1	2	2	2	1	4	2	2	2	2	2	2.0625	0.680074	0.329733	33	32.0_36.0	0.258199	0.570053	Medium variability
OG0001274	1	2	2	2	1	1	2	3	3	3	3	3	2	2	2	1	2.0625	0.771902	0.374256	33	32.0_36.0	0.258199	0.570053	Medium variability
OG0001275	2	2	2	1	2	2	2	2	1	3	2	3	3	2	2	2	2.0625	0.57373	0.278172	33	32.0_36.0	0.258199	0.570053	Medium variability
OG0001276	3	2	2	2	2	2	2	2	2	2	2	2	2	2	2	2	2.0625	0.25	0.121212	33	32.0_36.0	0.258199	0.570053	Low variability
OG0001277	2	2	1	2	1	1	1	1	2	3	4	2	2	3	2	4	2.0625	0.997914	0.483837	33	32.0_36.0	0.258199	0.570053	Medium variability
OG0001278	2	3	1	2	2	2	2	3	2	2	2	2	2	2	2	2	2.0625	0.442531	0.21456	33	32.0_36.0	0.258199	0.570053	Low variability
OG0001279	2	1	1	2	2	1	3	1	3	2	6	2	2	1	2	2	2.0625	1.23659	0.599561	33	32.0_36.0	0.258199	0.570053	High variability
OG0001280	2	2	3	2	2	2	2	2	2	2	2	2	2	2	2	2	2.0625	0.25	0.121212	33	32.0_36.0	0.258199	0.570053	Low variability
OG0001281	3	1	1	2	2	2	3	2	2	1	3	2	3	2	2	2	2.0625	0.680074	0.329733	33	32.0_36.0	0.258199	0.570053	Medium variability
OG0001282	3	2	4	1	5	1	1	1	1	1	4	1	2	1	2	3	2.0625	1.34009	0.649739	33	32.0_36.0	0.258199	0.570053	High variability
OG0001283	2	2	2	2	2	1	1	3	2	2	5	2	2	2	2	1	2.0625	0.928709	0.450283	33	32.0_36.0	0.258199	0.570053	Medium variability
OG0001284	2	1	3	1	2	2	3	2	2	2	2	2	2	2	2	3	2.0625	0.57373	0.278172	33	32.0_36.0	0.258199	0.570053	Medium variability
OG0001285	3	2	1	2	3	2	2	1	2	1	3	2	4	1	2	2	2.0625	0.853913	0.414018	33	32.0_36.0	0.258199	0.570053	Medium variability
OG0001286	4	1	2	1	3	2	3	1	2	1	3	2	2	2	2	2	2.0625	0.853913	0.414018	33	32.0_36.0	0.258199	0.570053	Medium variability
OG0001287	4	2	2	3	2	1	1	1	2	1	3	2	1	3	1	4	2.0625	1.06262	0.515211	33	32.0_36.0	0.258199	0.570053	Medium variability
OG0001288	4	3	2	2	3	1	1	1	2	1	2	2	2	2	2	3	2.0625	0.853913	0.414018	33	32.0_36.0	0.258199	0.570053	Medium variability
OG0001289	2	3	3	2	3	4	1	0	2	2	2	2	1	3	2	1	2.0625	0.997914	0.483837	33	32.0_36.0	0.258199	0.570053	Medium variability
OG0001290	2	3	1	2	4	2	2	2	2	2	2	2	1	2	2	2	2.0625	0.680074	0.329733	33	32.0_36.0	0.258199	0.570053	Medium variability
OG0001291	2	1	2	4	1	4	1	1	2	2	2	3	2	4	2	0	2.0625	1.18145	0.572826	33	32.0_36.0	0.258199	0.570053	High variability
OG0001292	2	3	2	2	2	2	2	2	2	2	2	2	2	2	2	2	2.0625	0.25	0.121212	33	32.0_36.0	0.258199	0.570053	Low variability
OG0001293	3	2	2	2	4	2	1	1	2	3	3	1	1	2	2	2	2.0625	0.853913	0.414018	33	32.0_36.0	0.258199	0.570053	Medium variability
OG0001294	1	2	2	2	2	3	2	1	2	3	3	2	2	3	2	1	2.0625	0.680074	0.329733	33	32.0_36.0	0.258199	0.570053	Medium variability
OG0001295	2	1	2	2	1	2	2	2	2	2	3	2	3	3	2	2	2.0625	0.57373	0.278172	33	32.0_36.0	0.258199	0.570053	Medium variability
OG0001296	3	2	2	2	2	2	2	1	3	2	1	2	2	2	2	3	2.0625	0.57373	0.278172	33	32.0_36.0	0.258199	0.570053	Medium variability
OG0001297	2	2	1	2	2	3	2	2	2	2	2	2	2	2	2	3	2.0625	0.442531	0.21456	33	32.0_36.0	0.258199	0.570053	Low variability
OG0001298	3	2	2	2	3	2	2	2	2	2	2	2	2	2	2	1	2.0625	0.442531	0.21456	33	32.0_36.0	0.258199	0.570053	Low variability
OG0001299	2	1	3	2	3	2	2	1	2	2	2	3	1	2	3	2	2.0625	0.680074	0.329733	33	32.0_36.0	0.258199	0.570053	Medium variability
OG0001300	1	3	3	2	3	1	1	1	3	3	1	3	3	3	1	1	2.0625	0.997914	0.483837	33	32.0_36.0	0.258199	0.570053	Medium variability
OG0001301	3	3	1	1	2	2	2	1	3	1	2	2	0	4	4	2	2.0625	1.12361	0.544781	33	32.0_36.0	0.258199	0.570053	Medium variability
OG0001302	2	2	3	2	2	2	2	2	1	2	2	2	2	3	2	2	2.0625	0.442531	0.21456	33	32.0_36.0	0.258199	0.570053	Low variability
OG0001303	1	2	4	1	0	2	3	3	6	7	1	0	0	0	2	1	2.0625	2.11246	1.02422	33	32.0_36.0	0.258199	0.570053	High variability
OG0001304	1	0	2	3	3	2	4	2	2	3	2	2	1	3	2	1	2.0625	0.997914	0.483837	33	32.0_36.0	0.258199	0.570053	Medium variability
OG0001305	1	1	2	2	3	2	3	2	2	2	2	2	3	2	1	3	2.0625	0.680074	0.329733	33	32.0_36.0	0.258199	0.570053	Medium variability
OG0001306	2	2	2	1	2	2	3	2	3	2	2	2	3	1	3	1	2.0625	0.680074	0.329733	33	32.0_36.0	0.258199	0.570053	Medium variability
OG0001307	2	2	2	2	2	3	1	1	4	2	2	3	2	2	2	1	2.0625	0.771902	0.374256	33	32.0_36.0	0.258199	0.570053	Medium variability
OG0001308	1	2	4	3	4	3	2	1	1	2	3	1	2	2	1	1	2.0625	1.06262	0.515211	33	32.0_36.0	0.258199	0.570053	Medium variability
OG0001309	1	2	2	2	3	2	1	2	2	1	4	2	1	4	2	2	2.0625	0.928709	0.450283	33	32.0_36.0	0.258199	0.570053	Medium variability
OG0001310	3	2	3	1	3	1	2	2	3	3	1	2	1	3	2	1	2.0625	0.853913	0.414018	33	32.0_36.0	0.258199	0.570053	Medium variability
OG0001311	3	2	1	2	4	2	1	1	1	1	4	2	2	2	2	3	2.0625	0.997914	0.483837	33	32.0_36.0	0.258199	0.570053	Medium variability
OG0001312	2	2	1	2	2	2	2	4	2	2	2	2	2	2	2	2	2.0625	0.57373	0.278172	33	32.0_36.0	0.258199	0.570053	Medium variability
OG0001313	1	2	1	2	2	3	2	3	2	2	3	1	2	3	2	2	2.0625	0.680074	0.329733	33	32.0_36.0	0.258199	0.570053	Medium variability
OG0001314	2	3	5	2	3	1	1	1	2	2	2	2	2	2	2	1	2.0625	0.997914	0.483837	33	32.0_36.0	0.258199	0.570053	Medium variability
OG0001315	2	1	2	2	3	2	2	1	2	2	3	2	2	3	2	2	2.0625	0.57373	0.278172	33	32.0_36.0	0.258199	0.570053	Medium variability
OG0001316	2	3	1	2	3	3	2	3	2	2	0	3	1	1	2	3	2.0625	0.928709	0.450283	33	32.0_36.0	0.258199	0.570053	Medium variability
OG0001317	3	3	1	2	2	2	2	2	2	2	3	2	2	2	1	2	2.0625	0.57373	0.278172	33	32.0_36.0	0.258199	0.570053	Medium variability
OG0001318	2	1	2	2	2	1	2	1	3	4	2	3	2	2	2	2	2.0625	0.771902	0.374256	33	32.0_36.0	0.258199	0.570053	Medium variability
OG0001319	2	2	1	2	3	2	3	2	2	2	3	2	1	2	2	2	2.0625	0.57373	0.278172	33	32.0_36.0	0.258199	0.570053	Medium variability
OG0001320	2	1	1	1	3	1	3	2	1	2	5	3	2	1	3	2	2.0625	1.12361	0.544781	33	32.0_36.0	0.258199	0.570053	Medium variability
OG0001321	1	3	2	2	2	2	2	2	2	2	2	2	2	2	3	2	2.0625	0.442531	0.21456	33	32.0_36.0	0.258199	0.570053	Low variability
OG0001322	2	2	2	3	2	1	2	2	2	2	2	2	2	2	3	2	2.0625	0.442531	0.21456	33	32.0_36.0	0.258199	0.570053	Low variability
OG0001323	2	2	2	2	1	2	3	2	2	2	3	2	2	2	2	2	2.0625	0.442531	0.21456	33	32.0_36.0	0.258199	0.570053	Low variability
OG0001324	1	2	2	1	1	3	0	2	3	4	1	3	3	2	2	3	2.0625	1.06262	0.515211	33	32.0_36.0	0.258199	0.570053	Medium variability
OG0001325	2	2	3	3	2	2	2	2	2	2	2	2	2	1	2	2	2.0625	0.442531	0.21456	33	32.0_36.0	0.258199	0.570053	Low variability
OG0001326	2	2	2	3	2	2	2	2	2	2	2	2	2	2	2	2	2.0625	0.25	0.121212	33	32.0_36.0	0.258199	0.570053	Low variability
OG0001327	1	3	4	2	1	2	2	3	0	2	0	3	1	3	3	3	2.0625	1.18145	0.572826	33	32.0_36.0	0.258199	0.570053	High variability
OG0001328	2	1	1	2	4	2	1	2	2	1	4	3	1	2	2	3	2.0625	0.997914	0.483837	33	32.0_36.0	0.258199	0.570053	Medium variability
OG0001329	2	1	2	1	4	2	1	4	2	1	3	1	0	5	1	3	2.0625	1.38894	0.673428	33	32.0_36.0	0.258199	0.570053	High variability
OG0001330	2	1	3	2	3	3	2	1	2	2	2	4	1	2	2	1	2.0625	0.853913	0.414018	33	32.0_36.0	0.258199	0.570053	Medium variability
OG0001331	3	1	2	2	2	2	1	2	1	3	5	2	2	2	2	1	2.0625	0.997914	0.483837	33	32.0_36.0	0.258199	0.570053	Medium variability
OG0001332	1	3	2	2	3	3	2	2	2	2	1	2	2	2	2	2	2.0625	0.57373	0.278172	33	32.0_36.0	0.258199	0.570053	Medium variability
OG0001333	1	1	3	2	3	3	1	0	3	3	3	2	2	1	2	3	2.0625	0.997914	0.483837	33	32.0_36.0	0.258199	0.570053	Medium variability
OG0001334	1	3	2	3	4	2	3	2	2	2	3	1	1	2	1	1	2.0625	0.928709	0.450283	33	32.0_36.0	0.258199	0.570053	Medium variability
OG0001335	2	2	2	2	2	2	2	3	2	2	3	2	2	2	2	1	2.0625	0.442531	0.21456	33	32.0_36.0	0.258199	0.570053	Low variability
OG0001336	1	2	2	2	2	3	1	2	3	2	2	3	1	3	3	1	2.0625	0.771902	0.374256	33	32.0_36.0	0.258199	0.570053	Medium variability
OG0001337	1	1	2	3	3	1	2	3	4	2	3	2	1	1	3	1	2.0625	0.997914	0.483837	33	32.0_36.0	0.258199	0.570053	Medium variability
OG0001338	0	0	1	0	0	0	0	32	0	0	0	0	0	0	0	0	2.0625	7.98723	3.8726	33	32.0_36.0	0.258199	0.570053	High variability
OG0001340	0	0	0	0	0	0	0	30	0	3	0	0	0	0	0	0	2.0625	7.48749	3.6303	33	32.0_36.0	0.258199	0.570053	High variability
OG0001341	3	1	3	1	3	2	2	2	2	2	3	1	2	2	1	2	2	0.730297	0.365148	32	32.0_36.0	0.258199	0.570053	Medium variability
OG0001342	1	1	2	2	2	2	2	2	2	2	2	2	2	3	2	3	2	0.516398	0.258199	32	32.0_36.0	0.258199	0.570053	Medium variability
OG0001343	3	2	1	3	2	1	2	3	1	2	3	2	2	2	2	1	2	0.730297	0.365148	32	32.0_36.0	0.258199	0.570053	Medium variability
OG0001345	2	1	3	4	1	2	2	2	1	3	1	2	1	4	1	2	2	1.0328	0.516398	32	32.0_36.0	0.258199	0.570053	Medium variability
OG0001347	2	2	2	3	2	2	2	2	2	2	2	2	1	2	2	2	2	0.365148	0.182574	32	32.0_36.0	0.258199	0.570053	Low variability
OG0001348	2	2	2	2	2	3	2	2	2	2	4	2	1	2	1	1	2	0.730297	0.365148	32	32.0_36.0	0.258199	0.570053	Medium variability
OG0001349	2	3	1	2	2	2	2	1	3	2	3	1	2	2	2	2	2	0.632456	0.316228	32	32.0_36.0	0.258199	0.570053	Medium variability
OG0001350	4	2	1	2	3	3	1	1	1	1	2	1	3	2	1	4	2	1.09545	0.547723	32	32.0_36.0	0.258199	0.570053	Medium variability
OG0001351	3	2	2	2	2	2	2	2	2	2	2	2	2	2	1	2	2	0.365148	0.182574	32	32.0_36.0	0.258199	0.570053	Low variability
OG0001352	6	0	2	2	1	0	1	5	2	3	1	1	1	4	1	2	2	1.7127	0.856349	32	32.0_36.0	0.258199	0.570053	High variability
OG0001353	1	1	2	1	4	3	1	2	1	2	5	2	2	1	2	2	2	1.1547	0.57735	32	32.0_36.0	0.258199	0.570053	High variability
OG0001354	2	1	2	1	2	2	2	1	2	2	4	2	2	1	2	4	2	0.894427	0.447214	32	32.0_36.0	0.258199	0.570053	Medium variability
OG0001355	2	3	2	2	4	2	2	1	1	2	2	1	1	3	2	2	2	0.816497	0.408248	32	32.0_36.0	0.258199	0.570053	Medium variability
OG0001356	3	1	2	3	4	1	1	2	2	1	5	1	1	2	2	1	2	1.21106	0.60553	32	32.0_36.0	0.258199	0.570053	High variability
OG0001357	2	2	2	2	2	2	2	2	2	2	3	2	1	2	2	2	2	0.365148	0.182574	32	32.0_36.0	0.258199	0.570053	Low variability
OG0001358	1	2	1	2	3	1	2	2	2	2	4	2	1	3	1	3	2	0.894427	0.447214	32	32.0_36.0	0.258199	0.570053	Medium variability
OG0001360	3	2	3	2	1	3	2	1	1	2	2	2	2	2	2	2	2	0.632456	0.316228	32	32.0_36.0	0.258199	0.570053	Medium variability
OG0001361	1	3	3	3	4	2	2	0	1	1	2	2	2	2	2	2	2	0.966092	0.483046	32	32.0_36.0	0.258199	0.570053	Medium variability
OG0001362	2	2	1	3	2	2	1	2	2	3	2	2	1	2	3	2	2	0.632456	0.316228	32	32.0_36.0	0.258199	0.570053	Medium variability
OG0001363	2	2	2	4	2	2	2	1	3	1	2	2	2	1	2	2	2	0.730297	0.365148	32	32.0_36.0	0.258199	0.570053	Medium variability
OG0001364	2	2	1	2	3	2	2	3	1	2	3	2	1	2	2	2	2	0.632456	0.316228	32	32.0_36.0	0.258199	0.570053	Medium variability
OG0001365	3	1	2	1	2	1	1	2	3	4	4	1	2	2	2	1	2	1.0328	0.516398	32	32.0_36.0	0.258199	0.570053	Medium variability
OG0001366	2	1	1	1	1	3	2	2	2	2	3	1	3	4	2	2	2	0.894427	0.447214	32	32.0_36.0	0.258199	0.570053	Medium variability
OG0001367	2	2	2	1	3	1	2	1	2	2	3	2	2	3	1	3	2	0.730297	0.365148	32	32.0_36.0	0.258199	0.570053	Medium variability
OG0001368	4	1	2	1	3	2	1	2	2	2	4	2	1	1	2	2	2	0.966092	0.483046	32	32.0_36.0	0.258199	0.570053	Medium variability
OG0001369	4	4	1	1	1	2	1	2	2	3	1	2	1	1	1	5	2	1.31656	0.658281	32	32.0_36.0	0.258199	0.570053	High variability
OG0001370	4	3	1	2	2	1	3	1	1	3	2	3	1	2	1	2	2	0.966092	0.483046	32	32.0_36.0	0.258199	0.570053	Medium variability
OG0001371	4	0	1	2	2	5	1	0	3	3	5	0	1	2	1	2	2	1.63299	0.816497	32	32.0_36.0	0.258199	0.570053	High variability
OG0001372	3	2	2	2	2	1	2	0	3	3	3	1	1	3	3	1	2	0.966092	0.483046	32	32.0_36.0	0.258199	0.570053	Medium variability
OG0001373	3	3	1	0	3	3	3	3	0	1	2	3	1	2	2	2	2	1.09545	0.547723	32	32.0_36.0	0.258199	0.570053	Medium variability
OG0001374	2	2	3	1	2	2	1	2	1	2	5	2	1	2	2	2	2	0.966092	0.483046	32	32.0_36.0	0.258199	0.570053	Medium variability
OG0001375	2	4	3	1	3	2	3	2	1	1	1	2	2	2	1	2	2	0.894427	0.447214	32	32.0_36.0	0.258199	0.570053	Medium variability
OG0001376	3	2	1	2	2	2	2	2	2	2	2	2	2	2	2	2	2	0.365148	0.182574	32	32.0_36.0	0.258199	0.570053	Low variability
OG0001377	3	2	2	3	1	2	3	4	1	1	2	2	2	2	1	1	2	0.894427	0.447214	32	32.0_36.0	0.258199	0.570053	Medium variability
OG0001378	2	1	3	3	1	3	1	1	4	1	1	3	1	3	4	0	2	1.26491	0.632456	32	32.0_36.0	0.258199	0.570053	High variability
OG0001380	3	1	6	0	2	1	3	0	2	1	3	3	1	2	1	3	2	1.50555	0.752773	32	32.0_36.0	0.258199	0.570053	High variability
OG0001381	2	2	3	1	3	2	2	2	1	2	1	2	2	2	2	3	2	0.632456	0.316228	32	32.0_36.0	0.258199	0.570053	Medium variability
OG0001382	3	2	2	2	2	2	2	1	2	2	2	2	2	2	2	2	2	0.365148	0.182574	32	32.0_36.0	0.258199	0.570053	Low variability
OG0001383	1	1	4	2	2	1	4	1	2	3	2	4	1	2	2	0	2	1.21106	0.60553	32	32.0_36.0	0.258199	0.570053	High variability
OG0001384	2	1	2	1	3	1	2	2	3	2	3	2	3	2	2	1	2	0.730297	0.365148	32	32.0_36.0	0.258199	0.570053	Medium variability
OG0001385	2	2	2	2	3	2	1	3	1	2	2	1	3	1	3	2	2	0.730297	0.365148	32	32.0_36.0	0.258199	0.570053	Medium variability
OG0001386	2	2	2	0	3	4	0	1	4	1	2	1	1	3	5	1	2	1.46059	0.730297	32	32.0_36.0	0.258199	0.570053	High variability
OG0001387	3	2	3	2	4	2	1	1	1	1	3	1	2	2	2	2	2	0.894427	0.447214	32	32.0_36.0	0.258199	0.570053	Medium variability
OG0001389	2	2	2	2	2	2	2	2	1	2	2	2	2	3	2	2	2	0.365148	0.182574	32	32.0_36.0	0.258199	0.570053	Low variability
OG0001390	1	4	1	0	4	2	1	2	1	4	2	1	3	1	2	3	2	1.26491	0.632456	32	32.0_36.0	0.258199	0.570053	High variability
OG0001391	4	1	2	2	2	4	2	2	1	2	1	2	2	2	1	2	2	0.894427	0.447214	32	32.0_36.0	0.258199	0.570053	Medium variability
OG0001392	2	2	1	3	4	1	2	1	1	2	4	2	1	1	2	3	2	1.0328	0.516398	32	32.0_36.0	0.258199	0.570053	Medium variability
OG0001393	2	3	2	2	2	2	1	2	2	2	3	1	2	2	3	1	2	0.632456	0.316228	32	32.0_36.0	0.258199	0.570053	Medium variability
OG0001394	2	1	3	2	3	2	3	1	2	2	3	2	1	1	2	2	2	0.730297	0.365148	32	32.0_36.0	0.258199	0.570053	Medium variability
OG0001395	2	3	3	2	1	2	2	3	1	2	1	3	1	2	2	2	2	0.730297	0.365148	32	32.0_36.0	0.258199	0.570053	Medium variability
OG0001396	1	2	2	2	2	3	2	2	2	2	2	2	2	2	2	2	2	0.365148	0.182574	32	32.0_36.0	0.258199	0.570053	Low variability
OG0001397	2	3	1	2	3	1	2	2	1	2	3	2	2	2	2	2	2	0.632456	0.316228	32	32.0_36.0	0.258199	0.570053	Medium variability
OG0001398	1	2	2	2	4	2	1	2	1	2	2	3	2	1	2	3	2	0.816497	0.408248	32	32.0_36.0	0.258199	0.570053	Medium variability
OG0001399	3	0	4	2	2	2	2	3	2	2	3	2	2	2	1	0	2	1.0328	0.516398	32	32.0_36.0	0.258199	0.570053	Medium variability
OG0001400	3	2	2	2	2	2	2	2	2	2	2	2	1	2	2	2	2	0.365148	0.182574	32	32.0_36.0	0.258199	0.570053	Low variability
OG0001401	2	3	2	2	2	2	2	2	2	2	2	2	1	2	2	2	2	0.365148	0.182574	32	32.0_36.0	0.258199	0.570053	Low variability
OG0001402	2	2	5	1	2	2	3	2	2	2	2	1	3	1	1	1	2	1.0328	0.516398	32	32.0_36.0	0.258199	0.570053	Medium variability
OG0001403	2	2	2	1	2	2	2	2	3	2	3	1	2	2	2	2	2	0.516398	0.258199	32	32.0_36.0	0.258199	0.570053	Medium variability
OG0001404	3	2	2	2	3	2	1	1	2	2	2	2	2	2	2	2	2	0.516398	0.258199	32	32.0_36.0	0.258199	0.570053	Medium variability
OG0001405	2	1	2	2	2	2	2	2	2	2	2	2	2	2	2	3	2	0.365148	0.182574	32	32.0_36.0	0.258199	0.570053	Low variability
OG0001407	5	3	1	2	2	2	2	2	1	2	3	1	1	1	2	2	2	1.0328	0.516398	32	32.0_36.0	0.258199	0.570053	Medium variability
OG0001408	2	2	1	1	3	4	1	2	2	2	2	3	2	2	2	1	2	0.816497	0.408248	32	32.0_36.0	0.258199	0.570053	Medium variability
OG0001409	2	3	2	2	2	1	1	2	1	2	3	1	2	2	2	4	2	0.816497	0.408248	32	32.0_36.0	0.258199	0.570053	Medium variability
OG0001410	1	1	3	3	3	2	0	3	2	3	4	1	0	1	2	3	2	1.21106	0.60553	32	32.0_36.0	0.258199	0.570053	High variability
OG0001411	2	3	1	2	2	1	2	2	3	2	2	3	2	1	3	1	2	0.730297	0.365148	32	32.0_36.0	0.258199	0.570053	Medium variability
OG0001412	1	2	2	2	2	2	3	2	2	2	2	1	2	2	2	3	2	0.516398	0.258199	32	32.0_36.0	0.258199	0.570053	Medium variability
OG0001413	2	2	1	2	2	3	3	2	1	2	1	2	2	1	2	4	2	0.816497	0.408248	32	32.0_36.0	0.258199	0.570053	Medium variability
OG0001414	1	3	2	3	2	4	2	0	2	2	1	2	2	2	3	1	2	0.966092	0.483046	32	32.0_36.0	0.258199	0.570053	Medium variability
OG0001415	3	2	1	2	3	1	1	3	1	2	2	2	2	3	2	2	2	0.730297	0.365148	32	32.0_36.0	0.258199	0.570053	Medium variability
OG0001416	3	2	1	3	4	2	2	2	1	1	3	2	1	2	2	1	2	0.894427	0.447214	32	32.0_36.0	0.258199	0.570053	Medium variability
OG0001417	2	2	1	2	2	3	2	5	1	1	2	2	2	2	2	1	2	0.966092	0.483046	32	32.0_36.0	0.258199	0.570053	Medium variability
OG0001418	2	1	2	2	2	2	1	2	2	2	2	3	2	2	2	3	2	0.516398	0.258199	32	32.0_36.0	0.258199	0.570053	Medium variability
OG0001419	3	2	1	2	3	1	1	2	2	3	1	2	3	2	2	2	2	0.730297	0.365148	32	32.0_36.0	0.258199	0.570053	Medium variability
OG0001421	2	2	2	3	1	2	2	2	2	5	1	2	2	1	2	1	2	0.966092	0.483046	32	32.0_36.0	0.258199	0.570053	Medium variability
OG0001422	1	1	3	2	3	3	2	1	2	2	2	2	2	2	3	1	2	0.730297	0.365148	32	32.0_36.0	0.258199	0.570053	Medium variability
OG0001423	2	2	2	2	3	2	1	2	2	2	2	2	2	2	2	2	2	0.365148	0.182574	32	32.0_36.0	0.258199	0.570053	Low variability
OG0001424	2	2	1	2	2	2	1	2	3	3	2	3	1	2	3	1	2	0.730297	0.365148	32	32.0_36.0	0.258199	0.570053	Medium variability
OG0001425	1	3	3	1	2	4	1	0	2	2	3	1	1	2	2	4	2	1.1547	0.57735	32	32.0_36.0	0.258199	0.570053	High variability
OG0001426	2	2	0	3	1	3	2	2	2	1	2	2	1	4	3	2	2	0.966092	0.483046	32	32.0_36.0	0.258199	0.570053	Medium variability
OG0001427	2	2	2	2	1	2	2	2	2	2	3	2	2	2	2	2	2	0.365148	0.182574	32	32.0_36.0	0.258199	0.570053	Low variability
OG0001428	3	1	1	2	2	2	1	1	3	2	2	3	2	2	3	2	2	0.730297	0.365148	32	32.0_36.0	0.258199	0.570053	Medium variability
OG0001429	2	3	2	2	2	2	2	2	1	2	2	2	2	2	2	2	2	0.365148	0.182574	32	32.0_36.0	0.258199	0.570053	Low variability
OG0001430	2	2	2	2	2	2	2	3	2	2	2	2	2	2	2	1	2	0.365148	0.182574	32	32.0_36.0	0.258199	0.570053	Low variability
OG0001431	1	3	2	2	2	2	2	2	2	2	2	2	2	2	3	1	2	0.516398	0.258199	32	32.0_36.0	0.258199	0.570053	Medium variability
OG0001432	3	1	2	2	3	1	1	3	1	1	5	2	2	2	1	2	2	1.09545	0.547723	32	32.0_36.0	0.258199	0.570053	Medium variability
OG0001433	1	2	1	2	3	2	2	2	2	2	1	2	2	4	2	2	2	0.730297	0.365148	32	32.0_36.0	0.258199	0.570053	Medium variability
OG0001434	2	5	1	1	3	2	1	2	1	1	2	2	2	1	4	2	2	1.1547	0.57735	32	32.0_36.0	0.258199	0.570053	High variability
OG0001435	2	3	1	2	2	3	1	3	2	2	2	2	1	2	1	3	2	0.730297	0.365148	32	32.0_36.0	0.258199	0.570053	Medium variability
OG0001436	2	2	2	2	2	2	2	1	2	1	3	2	2	2	3	2	2	0.516398	0.258199	32	32.0_36.0	0.258199	0.570053	Medium variability
OG0001438	1	1	2	2	4	2	2	2	2	2	4	1	1	2	3	1	2	0.966092	0.483046	32	32.0_36.0	0.258199	0.570053	Medium variability
OG0001439	2	1	2	3	3	2	2	2	1	2	2	2	2	2	1	3	2	0.632456	0.316228	32	32.0_36.0	0.258199	0.570053	Medium variability
OG0001440	1	0	2	5	3	1	2	0	2	4	3	2	3	2	2	0	2	1.41421	0.707107	32	32.0_36.0	0.258199	0.570053	High variability
OG0001441	3	1	3	2	4	0	0	2	1	2	4	1	2	3	1	3	2	1.26491	0.632456	32	32.0_36.0	0.258199	0.570053	High variability
OG0001442	2	2	2	3	2	3	2	2	2	2	2	2	0	2	2	2	2	0.632456	0.316228	32	32.0_36.0	0.258199	0.570053	Medium variability
OG0001443	2	1	3	2	3	2	1	3	2	2	1	2	2	2	2	2	2	0.632456	0.316228	32	32.0_36.0	0.258199	0.570053	Medium variability
OG0001444	1	2	2	2	2	2	2	2	2	2	2	2	2	3	3	1	2	0.516398	0.258199	32	32.0_36.0	0.258199	0.570053	Medium variability
OG0001445	1	3	1	2	5	3	3	1	1	1	4	2	1	1	1	2	2	1.26491	0.632456	32	32.0_36.0	0.258199	0.570053	High variability
OG0001446	1	1	4	2	2	2	1	1	2	2	1	3	1	3	4	2	2	1.0328	0.516398	32	32.0_36.0	0.258199	0.570053	Medium variability
OG0001447	2	2	2	2	1	2	2	3	2	2	2	1	3	2	2	2	2	0.516398	0.258199	32	32.0_36.0	0.258199	0.570053	Medium variability
OG0001448	1	3	2	1	2	2	1	1	2	4	4	2	1	3	2	1	2	1.0328	0.516398	32	32.0_36.0	0.258199	0.570053	Medium variability
OG0001449	2	2	2	2	4	2	1	1	2	1	3	2	2	2	2	2	2	0.730297	0.365148	32	32.0_36.0	0.258199	0.570053	Medium variability
OG0001450	2	0	2	3	2	2	2	1	3	2	3	2	1	2	2	3	2	0.816497	0.408248	32	32.0_36.0	0.258199	0.570053	Medium variability
OG0001451	1	1	4	2	2	2	4	0	4	1	3	1	3	3	1	0	2	1.36626	0.68313	32	32.0_36.0	0.258199	0.570053	High variability
OG0001452	1	2	2	1	3	3	2	1	2	4	2	1	1	4	1	2	2	1.0328	0.516398	32	32.0_36.0	0.258199	0.570053	Medium variability
OG0001453	3	2	2	2	2	2	2	2	2	1	2	2	2	2	2	2	2	0.365148	0.182574	32	32.0_36.0	0.258199	0.570053	Low variability
OG0001454	2	2	2	1	3	2	3	1	2	1	5	1	2	1	3	1	2	1.09545	0.547723	32	32.0_36.0	0.258199	0.570053	Medium variability
OG0001456	2	2	5	1	0	2	1	5	2	2	1	2	1	2	2	2	2	1.31656	0.658281	32	32.0_36.0	0.258199	0.570053	High variability
OG0001457	2	1	2	1	3	1	0	1	2	2	5	2	4	2	3	1	2	1.26491	0.632456	32	32.0_36.0	0.258199	0.570053	High variability
OG0001458	3	3	2	1	3	1	2	1	2	1	4	2	2	1	2	2	2	0.894427	0.447214	32	32.0_36.0	0.258199	0.570053	Medium variability
OG0001460	3	3	1	2	1	3	2	2	3	2	2	2	1	0	3	2	2	0.894427	0.447214	32	32.0_36.0	0.258199	0.570053	Medium variability
OG0001461	1	2	1	2	3	2	3	2	1	2	2	2	2	2	2	3	2	0.632456	0.316228	32	32.0_36.0	0.258199	0.570053	Medium variability
OG0001462	1	2	4	2	1	2	2	2	2	2	2	2	2	2	2	2	2	0.632456	0.316228	32	32.0_36.0	0.258199	0.570053	Medium variability
OG0001463	2	2	2	2	3	2	2	0	2	2	3	2	1	2	3	2	2	0.730297	0.365148	32	32.0_36.0	0.258199	0.570053	Medium variability
OG0001464	1	3	2	2	2	2	2	1	3	2	3	3	2	1	2	1	2	0.730297	0.365148	32	32.0_36.0	0.258199	0.570053	Medium variability
OG0001465	2	2	2	2	2	2	2	2	2	2	2	3	2	1	2	2	2	0.365148	0.182574	32	32.0_36.0	0.258199	0.570053	Low variability
OG0001466	1	4	0	3	3	1	2	2	2	3	3	2	1	3	1	1	2	1.09545	0.547723	32	32.0_36.0	0.258199	0.570053	Medium variability
OG0001467	3	1	4	1	3	3	2	1	2	2	1	1	1	2	3	2	2	0.966092	0.483046	32	32.0_36.0	0.258199	0.570053	Medium variability
OG0001468	1	1	3	2	2	1	3	1	2	3	4	2	2	2	2	1	2	0.894427	0.447214	32	32.0_36.0	0.258199	0.570053	Medium variability
OG0001469	1	0	2	2	5	3	2	2	2	4	2	1	0	2	1	3	2	1.31656	0.658281	32	32.0_36.0	0.258199	0.570053	High variability
OG0001470	2	3	3	1	4	1	1	1	1	2	5	1	4	1	1	1	2	1.36626	0.68313	32	32.0_36.0	0.258199	0.570053	High variability
OG0001471	2	3	2	2	2	2	1	2	2	2	2	2	2	2	2	2	2	0.365148	0.182574	32	32.0_36.0	0.258199	0.570053	Low variability
OG0001472	1	3	2	1	3	2	2	2	3	1	2	2	2	2	2	2	2	0.632456	0.316228	32	32.0_36.0	0.258199	0.570053	Medium variability
OG0001473	2	3	3	2	3	1	3	1	3	1	1	2	1	2	2	2	2	0.816497	0.408248	32	32.0_36.0	0.258199	0.570053	Medium variability
OG0001474	1	1	3	3	3	3	3	0	2	2	2	3	2	2	2	0	2	1.0328	0.516398	32	32.0_36.0	0.258199	0.570053	Medium variability
OG0001475	2	2	2	2	1	2	2	2	1	2	3	2	2	3	2	2	2	0.516398	0.258199	32	32.0_36.0	0.258199	0.570053	Medium variability
OG0001476	1	2	2	2	3	2	1	1	3	1	3	2	2	2	2	3	2	0.730297	0.365148	32	32.0_36.0	0.258199	0.570053	Medium variability
OG0001477	2	2	3	2	1	2	0	2	1	3	3	2	3	1	3	2	2	0.894427	0.447214	32	32.0_36.0	0.258199	0.570053	Medium variability
OG0001478	1	2	3	2	2	1	1	4	2	3	2	3	1	2	2	1	2	0.894427	0.447214	32	32.0_36.0	0.258199	0.570053	Medium variability
OG0001479	0	1	3	2	0	2	0	2	3	1	2	4	1	5	3	3	2	1.46059	0.730297	32	32.0_36.0	0.258199	0.570053	High variability
OG0001480	0	1	4	2	3	2	1	2	2	3	3	2	1	2	3	1	2	1.0328	0.516398	32	32.0_36.0	0.258199	0.570053	Medium variability
OG0001481	0	0	5	0	0	0	0	27	0	0	0	0	0	0	0	0	2	6.78233	3.39116	32	32.0_36.0	0.258199	0.570053	High variability
OG0001482	0	0	4	2	2	2	3	1	2	3	2	2	1	2	3	3	2	1.09545	0.547723	32	32.0_36.0	0.258199	0.570053	Medium variability
OG0001483	2	2	2	3	1	1	2	2	2	2	2	2	2	2	2	2	1.9375	0.442531	0.228403	31	28.0_32.0	0.255551	0.571429	Low variability
OG0001484	4	2	2	2	2	3	2	1	1	1	2	2	3	1	1	2	1.9375	0.853913	0.440729	31	28.0_32.0	0.255551	0.571429	Medium variability
OG0001485	3	2	1	2	1	3	2	1	1	3	3	2	2	2	1	2	1.9375	0.771902	0.398401	31	28.0_32.0	0.255551	0.571429	Medium variability
OG0001486	1	2	3	2	2	1	1	1	2	2	1	4	2	2	2	3	1.9375	0.853913	0.440729	31	28.0_32.0	0.255551	0.571429	Medium variability
OG0001487	2	2	2	2	3	2	1	3	0	2	2	2	2	2	2	2	1.9375	0.680074	0.351006	31	28.0_32.0	0.255551	0.571429	Medium variability
OG0001488	2	2	1	3	4	2	2	2	2	1	2	1	2	1	2	2	1.9375	0.771902	0.398401	31	28.0_32.0	0.255551	0.571429	Medium variability
OG0001489	2	2	2	2	1	2	2	2	2	2	2	2	2	2	2	2	1.9375	0.25	0.129032	31	28.0_32.0	0.255551	0.571429	Low variability
OG0001490	4	1	2	3	1	1	2	0	3	2	2	2	2	3	1	2	1.9375	0.997914	0.515053	31	28.0_32.0	0.255551	0.571429	Medium variability
OG0001491	4	3	1	1	1	4	1	3	1	2	1	1	1	1	1	5	1.9375	1.38894	0.716875	31	28.0_32.0	0.255551	0.571429	High variability
OG0001492	2	2	2	1	3	2	1	3	1	2	3	2	2	2	1	2	1.9375	0.680074	0.351006	31	28.0_32.0	0.255551	0.571429	Medium variability
OG0001493	1	2	2	2	2	2	1	4	2	1	2	2	2	2	2	2	1.9375	0.680074	0.351006	31	28.0_32.0	0.255551	0.571429	Medium variability
OG0001494	3	2	2	1	3	2	1	2	1	3	2	2	2	2	1	2	1.9375	0.680074	0.351006	31	28.0_32.0	0.255551	0.571429	Medium variability
OG0001495	1	2	2	3	2	2	1	3	2	2	2	2	1	2	3	1	1.9375	0.680074	0.351006	31	28.0_32.0	0.255551	0.571429	Medium variability
OG0001496	3	2	2	1	1	1	1	1	2	4	4	1	1	2	3	2	1.9375	1.06262	0.54845	31	28.0_32.0	0.255551	0.571429	Medium variability
OG0001497	4	2	1	2	2	2	2	2	2	1	2	1	2	2	2	2	1.9375	0.680074	0.351006	31	28.0_32.0	0.255551	0.571429	Medium variability
OG0001498	2	2	2	2	3	2	2	2	2	2	2	2	1	2	2	1	1.9375	0.442531	0.228403	31	28.0_32.0	0.255551	0.571429	Low variability
OG0001499	3	2	1	2	2	2	1	2	2	2	3	1	2	2	2	2	1.9375	0.57373	0.296119	31	28.0_32.0	0.255551	0.571429	Medium variability
OG0001500	2	3	1	3	3	2	2	2	2	1	1	2	2	2	1	2	1.9375	0.680074	0.351006	31	28.0_32.0	0.255551	0.571429	Medium variability
OG0001501	3	2	3	2	2	2	1	2	1	3	2	0	1	4	1	2	1.9375	0.997914	0.515053	31	28.0_32.0	0.255551	0.571429	Medium variability
OG0001502	2	3	1	2	3	1	1	0	2	2	1	2	3	2	3	3	1.9375	0.928709	0.479334	31	28.0_32.0	0.255551	0.571429	Medium variability
OG0001503	2	2	1	2	2	2	2	2	2	2	2	2	3	1	2	2	1.9375	0.442531	0.228403	31	28.0_32.0	0.255551	0.571429	Low variability
OG0001504	1	3	1	1	3	1	1	3	3	2	3	3	2	1	2	1	1.9375	0.928709	0.479334	31	28.0_32.0	0.255551	0.571429	Medium variability
OG0001505	3	2	3	2	4	3	1	3	1	1	2	2	0	2	1	1	1.9375	1.06262	0.54845	31	28.0_32.0	0.255551	0.571429	Medium variability
OG0001506	3	1	2	1	4	1	1	2	2	2	4	2	1	2	1	2	1.9375	0.997914	0.515053	31	28.0_32.0	0.255551	0.571429	Medium variability
OG0001507	3	2	1	2	3	2	3	1	2	3	2	2	1	2	1	1	1.9375	0.771902	0.398401	31	28.0_32.0	0.255551	0.571429	Medium variability
OG0001508	2	2	3	2	2	2	2	1	2	1	2	2	2	2	2	2	1.9375	0.442531	0.228403	31	28.0_32.0	0.255551	0.571429	Low variability
OG0001509	4	1	2	1	4	3	1	1	1	1	4	2	2	1	1	2	1.9375	1.18145	0.609783	31	28.0_32.0	0.255551	0.571429	High variability
OG0001510	2	3	1	2	2	2	3	2	1	2	2	2	2	2	2	1	1.9375	0.57373	0.296119	31	28.0_32.0	0.255551	0.571429	Medium variability
OG0001511	3	1	2	2	2	2	2	0	2	2	3	2	2	2	2	2	1.9375	0.680074	0.351006	31	28.0_32.0	0.255551	0.571429	Medium variability
OG0001512	3	2	3	2	1	2	1	2	3	2	2	2	2	1	1	2	1.9375	0.680074	0.351006	31	28.0_32.0	0.255551	0.571429	Medium variability
OG0001513	2	2	3	2	2	2	1	2	2	1	2	2	2	2	2	2	1.9375	0.442531	0.228403	31	28.0_32.0	0.255551	0.571429	Low variability
OG0001514	2	1	2	1	1	2	2	2	5	2	1	2	2	2	2	2	1.9375	0.928709	0.479334	31	28.0_32.0	0.255551	0.571429	Medium variability
OG0001515	4	4	3	0	2	0	2	0	5	0	2	2	2	2	1	2	1.9375	1.52616	0.787696	31	28.0_32.0	0.255551	0.571429	High variability
OG0001516	2	3	3	2	2	2	2	2	2	2	1	2	0	3	2	1	1.9375	0.771902	0.398401	31	28.0_32.0	0.255551	0.571429	Medium variability
OG0001517	2	2	2	2	2	2	2	2	2	1	2	2	2	2	2	2	1.9375	0.25	0.129032	31	28.0_32.0	0.255551	0.571429	Low variability
OG0001518	3	2	1	2	3	1	2	1	1	2	3	2	2	2	2	2	1.9375	0.680074	0.351006	31	28.0_32.0	0.255551	0.571429	Medium variability
OG0001519	3	1	3	3	2	1	1	2	3	2	1	2	1	1	3	2	1.9375	0.853913	0.440729	31	28.0_32.0	0.255551	0.571429	Medium variability
OG0001520	3	2	5	2	2	1	2	3	1	1	1	2	1	1	2	2	1.9375	1.06262	0.54845	31	28.0_32.0	0.255551	0.571429	Medium variability
OG0001521	2	2	2	2	2	2	2	3	1	2	2	2	2	2	2	1	1.9375	0.442531	0.228403	31	28.0_32.0	0.255551	0.571429	Low variability
OG0001522	3	2	1	2	2	1	1	1	2	3	2	2	3	2	2	2	1.9375	0.680074	0.351006	31	28.0_32.0	0.255551	0.571429	Medium variability
OG0001523	3	2	1	2	2	2	3	1	2	2	2	2	0	1	3	3	1.9375	0.853913	0.440729	31	28.0_32.0	0.255551	0.571429	Medium variability
OG0001524	2	3	1	1	2	2	1	2	2	1	2	2	1	3	4	2	1.9375	0.853913	0.440729	31	28.0_32.0	0.255551	0.571429	Medium variability
OG0001525	3	2	2	2	1	1	2	2	2	1	2	3	2	2	2	2	1.9375	0.57373	0.296119	31	28.0_32.0	0.255551	0.571429	Medium variability
OG0001526	3	2	2	2	2	1	2	1	2	2	3	2	1	2	2	2	1.9375	0.57373	0.296119	31	28.0_32.0	0.255551	0.571429	Medium variability
OG0001527	2	2	2	2	2	2	2	2	2	2	2	2	2	2	2	1	1.9375	0.25	0.129032	31	28.0_32.0	0.255551	0.571429	Low variability
OG0001528	2	2	1	2	2	1	2	1	2	3	2	3	2	2	2	2	1.9375	0.57373	0.296119	31	28.0_32.0	0.255551	0.571429	Medium variability
OG0001529	2	2	2	1	4	1	1	2	1	1	3	2	2	3	2	2	1.9375	0.853913	0.440729	31	28.0_32.0	0.255551	0.571429	Medium variability
OG0001530	2	2	2	2	2	1	2	2	2	2	2	2	2	3	1	2	1.9375	0.442531	0.228403	31	28.0_32.0	0.255551	0.571429	Low variability
OG0001531	4	1	3	2	3	1	1	3	1	1	3	1	1	2	3	1	1.9375	1.06262	0.54845	31	28.0_32.0	0.255551	0.571429	Medium variability
OG0001532	2	2	2	2	2	2	2	2	1	2	2	2	2	2	2	2	1.9375	0.25	0.129032	31	28.0_32.0	0.255551	0.571429	Low variability
OG0001533	2	2	2	2	3	1	2	1	1	2	3	2	2	2	2	2	1.9375	0.57373	0.296119	31	28.0_32.0	0.255551	0.571429	Medium variability
OG0001534	2	2	2	3	2	2	2	3	1	2	2	1	2	1	2	2	1.9375	0.57373	0.296119	31	28.0_32.0	0.255551	0.571429	Medium variability
OG0001535	3	3	3	2	3	0	0	0	4	1	3	3	1	2	3	0	1.9375	1.38894	0.716875	31	28.0_32.0	0.255551	0.571429	High variability
OG0001536	1	2	2	2	3	2	1	2	2	2	2	2	2	3	2	1	1.9375	0.57373	0.296119	31	28.0_32.0	0.255551	0.571429	Medium variability
OG0001537	1	3	2	3	1	2	2	2	2	2	2	2	2	2	2	1	1.9375	0.57373	0.296119	31	28.0_32.0	0.255551	0.571429	Medium variability
OG0001538	4	1	1	2	1	2	1	1	2	2	3	1	2	3	3	2	1.9375	0.928709	0.479334	31	28.0_32.0	0.255551	0.571429	Medium variability
OG0001539	3	3	1	1	3	3	2	0	2	2	3	2	2	2	1	1	1.9375	0.928709	0.479334	31	28.0_32.0	0.255551	0.571429	Medium variability
OG0001540	2	2	2	2	2	2	3	2	2	2	1	2	1	2	2	2	1.9375	0.442531	0.228403	31	28.0_32.0	0.255551	0.571429	Low variability
OG0001541	2	2	2	2	2	2	2	2	2	2	3	1	1	2	2	2	1.9375	0.442531	0.228403	31	28.0_32.0	0.255551	0.571429	Low variability
OG0001542	3	2	1	2	3	1	1	3	2	1	2	2	2	3	2	1	1.9375	0.771902	0.398401	31	28.0_32.0	0.255551	0.571429	Medium variability
OG0001543	2	1	2	0	1	1	3	3	2	1	2	4	2	1	3	3	1.9375	1.06262	0.54845	31	28.0_32.0	0.255551	0.571429	Medium variability
OG0001544	4	1	1	1	3	3	1	2	2	1	3	2	2	2	1	2	1.9375	0.928709	0.479334	31	28.0_32.0	0.255551	0.571429	Medium variability
OG0001545	2	1	2	2	2	1	3	2	1	2	2	1	2	1	2	5	1.9375	0.997914	0.515053	31	28.0_32.0	0.255551	0.571429	Medium variability
OG0001546	4	2	2	1	2	3	1	1	2	3	3	1	1	2	1	2	1.9375	0.928709	0.479334	31	28.0_32.0	0.255551	0.571429	Medium variability
OG0001547	2	2	2	1	4	1	1	2	1	2	4	1	2	2	2	2	1.9375	0.928709	0.479334	31	28.0_32.0	0.255551	0.571429	Medium variability
OG0001548	1	2	2	4	2	2	4	1	0	2	1	3	1	3	2	1	1.9375	1.12361	0.579928	31	28.0_32.0	0.255551	0.571429	High variability
OG0001549	3	2	2	2	1	2	2	2	2	2	2	2	1	2	2	2	1.9375	0.442531	0.228403	31	28.0_32.0	0.255551	0.571429	Low variability
OG0001550	1	0	1	3	5	0	1	1	2	2	4	1	1	3	1	5	1.9375	1.61116	0.831566	31	28.0_32.0	0.255551	0.571429	High variability
OG0001551	2	4	1	1	3	2	2	1	1	1	4	2	1	2	2	2	1.9375	0.997914	0.515053	31	28.0_32.0	0.255551	0.571429	Medium variability
OG0001552	2	2	1	2	2	2	1	3	2	2	2	2	2	2	2	2	1.9375	0.442531	0.228403	31	28.0_32.0	0.255551	0.571429	Low variability
OG0001553	2	1	1	2	2	1	2	4	2	3	2	2	2	2	2	1	1.9375	0.771902	0.398401	31	28.0_32.0	0.255551	0.571429	Medium variability
OG0001554	2	1	2	2	2	2	2	3	1	2	2	2	1	2	2	3	1.9375	0.57373	0.296119	31	28.0_32.0	0.255551	0.571429	Medium variability
OG0001555	2	2	2	2	3	2	2	2	2	1	2	1	2	2	2	2	1.9375	0.442531	0.228403	31	28.0_32.0	0.255551	0.571429	Low variability
OG0001556	2	2	2	2	4	1	2	1	2	2	2	2	2	2	2	1	1.9375	0.680074	0.351006	31	28.0_32.0	0.255551	0.571429	Medium variability
OG0001557	3	2	2	2	2	2	2	1	2	2	2	2	2	2	2	1	1.9375	0.442531	0.228403	31	28.0_32.0	0.255551	0.571429	Low variability
OG0001558	3	2	1	3	2	1	2	1	3	2	2	2	2	2	2	1	1.9375	0.680074	0.351006	31	28.0_32.0	0.255551	0.571429	Medium variability
OG0001559	1	2	2	2	3	2	2	1	2	3	2	1	0	4	2	2	1.9375	0.928709	0.479334	31	28.0_32.0	0.255551	0.571429	Medium variability
OG0001560	6	8	1	1	1	1	1	2	1	1	1	1	1	1	1	3	1.9375	2.08066	1.07389	31	28.0_32.0	0.255551	0.571429	High variability
OG0001561	2	1	2	2	2	2	2	2	2	2	2	2	2	2	2	2	1.9375	0.25	0.129032	31	28.0_32.0	0.255551	0.571429	Low variability
OG0001562	3	2	1	2	1	2	2	1	2	1	6	2	2	2	1	1	1.9375	1.23659	0.638242	31	28.0_32.0	0.255551	0.571429	High variability
OG0001563	2	2	1	1	5	2	1	3	2	2	3	1	2	1	2	1	1.9375	1.06262	0.54845	31	28.0_32.0	0.255551	0.571429	Medium variability
OG0001564	2	2	2	2	2	2	3	2	2	2	1	2	2	2	1	2	1.9375	0.442531	0.228403	31	28.0_32.0	0.255551	0.571429	Low variability
OG0001565	2	2	2	2	3	2	2	2	2	2	1	2	2	1	1	3	1.9375	0.57373	0.296119	31	28.0_32.0	0.255551	0.571429	Medium variability
OG0001566	2	2	2	2	2	2	2	2	2	1	2	2	2	2	2	2	1.9375	0.25	0.129032	31	28.0_32.0	0.255551	0.571429	Low variability
OG0001567	5	5	1	2	1	2	2	2	1	1	1	2	2	1	2	1	1.9375	1.28938	0.665486	31	28.0_32.0	0.255551	0.571429	High variability
OG0001568	2	2	2	2	1	2	3	2	2	2	2	2	1	2	2	2	1.9375	0.442531	0.228403	31	28.0_32.0	0.255551	0.571429	Low variability
OG0001569	6	2	1	2	2	1	1	3	2	1	2	1	2	1	1	3	1.9375	1.28938	0.665486	31	28.0_32.0	0.255551	0.571429	High variability
OG0001570	3	2	2	2	3	2	3	1	2	2	2	3	1	0	2	1	1.9375	0.853913	0.440729	31	28.0_32.0	0.255551	0.571429	Medium variability
OG0001571	2	1	2	2	1	3	2	1	2	3	1	3	2	2	3	1	1.9375	0.771902	0.398401	31	28.0_32.0	0.255551	0.571429	Medium variability
OG0001572	3	2	1	2	4	2	2	1	1	2	2	2	1	3	1	2	1.9375	0.853913	0.440729	31	28.0_32.0	0.255551	0.571429	Medium variability
OG0001573	2	1	2	2	2	2	3	1	2	1	2	3	2	1	4	1	1.9375	0.853913	0.440729	31	28.0_32.0	0.255551	0.571429	Medium variability
OG0001574	4	3	2	2	2	2	1	2	1	1	2	2	1	1	1	4	1.9375	0.997914	0.515053	31	28.0_32.0	0.255551	0.571429	Medium variability
OG0001575	2	1	2	2	2	2	2	1	2	2	2	2	2	2	2	3	1.9375	0.442531	0.228403	31	28.0_32.0	0.255551	0.571429	Low variability
OG0001576	2	3	2	2	2	2	2	2	2	1	2	2	2	2	1	2	1.9375	0.442531	0.228403	31	28.0_32.0	0.255551	0.571429	Low variability
OG0001577	3	3	0	2	3	2	2	1	2	1	1	3	1	2	2	3	1.9375	0.928709	0.479334	31	28.0_32.0	0.255551	0.571429	Medium variability
OG0001578	2	3	1	1	2	1	2	2	1	2	4	2	2	2	2	2	1.9375	0.771902	0.398401	31	28.0_32.0	0.255551	0.571429	Medium variability
OG0001579	3	3	2	1	4	1	2	1	2	1	3	1	3	2	2	0	1.9375	1.06262	0.54845	31	28.0_32.0	0.255551	0.571429	Medium variability
OG0001580	2	5	2	2	2	1	2	2	1	1	2	1	2	2	2	2	1.9375	0.928709	0.479334	31	28.0_32.0	0.255551	0.571429	Medium variability
OG0001581	2	1	2	2	3	1	2	2	2	2	2	2	2	2	2	2	1.9375	0.442531	0.228403	31	28.0_32.0	0.255551	0.571429	Low variability
OG0001582	1	1	3	2	2	2	2	2	2	2	2	2	2	2	2	2	1.9375	0.442531	0.228403	31	28.0_32.0	0.255551	0.571429	Low variability
OG0001583	2	2	1	3	1	2	1	1	1	3	2	3	1	3	3	2	1.9375	0.853913	0.440729	31	28.0_32.0	0.255551	0.571429	Medium variability
OG0001584	4	1	4	2	2	1	1	2	2	2	3	0	2	2	1	2	1.9375	1.06262	0.54845	31	28.0_32.0	0.255551	0.571429	Medium variability
OG0001585	3	1	2	1	2	1	1	2	2	2	3	2	2	2	2	3	1.9375	0.680074	0.351006	31	28.0_32.0	0.255551	0.571429	Medium variability
OG0001586	2	3	2	1	3	1	2	2	1	1	3	2	2	2	3	1	1.9375	0.771902	0.398401	31	28.0_32.0	0.255551	0.571429	Medium variability
OG0001587	2	2	2	2	3	2	2	1	2	2	1	2	2	2	3	1	1.9375	0.57373	0.296119	31	28.0_32.0	0.255551	0.571429	Medium variability
OG0001588	2	1	2	2	2	2	2	2	2	2	1	3	2	2	2	2	1.9375	0.442531	0.228403	31	28.0_32.0	0.255551	0.571429	Low variability
OG0001589	1	2	3	2	1	2	2	1	2	2	3	1	4	2	2	1	1.9375	0.853913	0.440729	31	28.0_32.0	0.255551	0.571429	Medium variability
OG0001590	2	3	1	1	3	1	2	2	2	3	3	1	3	1	1	2	1.9375	0.853913	0.440729	31	28.0_32.0	0.255551	0.571429	Medium variability
OG0001591	2	3	1	2	2	1	2	1	1	2	2	2	2	3	2	3	1.9375	0.680074	0.351006	31	28.0_32.0	0.255551	0.571429	Medium variability
OG0001592	3	1	3	1	3	2	1	2	1	2	4	1	3	1	2	1	1.9375	0.997914	0.515053	31	28.0_32.0	0.255551	0.571429	Medium variability
OG0001593	2	1	2	2	2	2	2	2	2	2	2	2	1	2	2	3	1.9375	0.442531	0.228403	31	28.0_32.0	0.255551	0.571429	Low variability
OG0001594	2	1	3	1	4	1	0	2	2	2	3	2	1	1	3	3	1.9375	1.06262	0.54845	31	28.0_32.0	0.255551	0.571429	Medium variability
OG0001595	1	2	3	3	2	2	2	2	2	1	2	2	2	2	1	2	1.9375	0.57373	0.296119	31	28.0_32.0	0.255551	0.571429	Medium variability
OG0001596	2	2	2	2	2	2	2	2	2	2	2	2	2	2	2	1	1.9375	0.25	0.129032	31	28.0_32.0	0.255551	0.571429	Low variability
OG0001597	2	2	2	2	1	2	2	2	2	2	2	2	2	2	2	2	1.9375	0.25	0.129032	31	28.0_32.0	0.255551	0.571429	Low variability
OG0001598	4	4	1	1	1	3	2	3	2	2	1	1	1	2	2	1	1.9375	1.06262	0.54845	31	28.0_32.0	0.255551	0.571429	Medium variability
OG0001599	3	2	1	2	2	2	2	1	1	1	4	2	2	2	2	2	1.9375	0.771902	0.398401	31	28.0_32.0	0.255551	0.571429	Medium variability
OG0001600	2	1	2	2	2	2	1	1	3	2	3	2	2	2	2	2	1.9375	0.57373	0.296119	31	28.0_32.0	0.255551	0.571429	Medium variability
OG0001601	2	2	2	2	2	3	2	1	2	2	2	1	2	2	1	3	1.9375	0.57373	0.296119	31	28.0_32.0	0.255551	0.571429	Medium variability
OG0001602	3	2	2	2	1	1	2	2	2	2	2	2	2	2	2	2	1.9375	0.442531	0.228403	31	28.0_32.0	0.255551	0.571429	Low variability
OG0001603	1	2	3	2	3	1	1	1	3	3	4	1	2	1	3	0	1.9375	1.12361	0.579928	31	28.0_32.0	0.255551	0.571429	High variability
OG0001604	2	2	2	2	3	2	1	1	2	3	2	2	2	2	3	0	1.9375	0.771902	0.398401	31	28.0_32.0	0.255551	0.571429	Medium variability
OG0001605	5	0	2	2	1	2	3	0	2	3	3	4	1	1	1	1	1.9375	1.38894	0.716875	31	28.0_32.0	0.255551	0.571429	High variability
OG0001606	1	3	3	1	4	4	1	1	1	2	4	1	0	3	1	1	1.9375	1.34009	0.691658	31	28.0_32.0	0.255551	0.571429	High variability
OG0001607	2	4	2	2	2	2	1	1	2	1	2	2	2	2	2	2	1.9375	0.680074	0.351006	31	28.0_32.0	0.255551	0.571429	Medium variability
OG0001608	3	1	2	1	2	1	2	1	2	2	2	3	2	3	1	3	1.9375	0.771902	0.398401	31	28.0_32.0	0.255551	0.571429	Medium variability
OG0001609	2	2	2	2	2	2	2	2	2	1	2	2	2	2	2	2	1.9375	0.25	0.129032	31	28.0_32.0	0.255551	0.571429	Low variability
OG0001610	2	2	3	2	2	1	2	1	2	2	2	2	2	2	2	2	1.9375	0.442531	0.228403	31	28.0_32.0	0.255551	0.571429	Low variability
OG0001611	3	0	1	2	2	3	2	0	4	3	5	2	1	2	1	0	1.9375	1.43614	0.741234	31	28.0_32.0	0.255551	0.571429	High variability
OG0001612	3	2	2	2	2	2	3	2	1	2	1	2	1	3	1	2	1.9375	0.680074	0.351006	31	28.0_32.0	0.255551	0.571429	Medium variability
OG0001613	2	0	4	3	1	1	1	1	5	3	2	2	1	2	2	1	1.9375	1.28938	0.665486	31	28.0_32.0	0.255551	0.571429	High variability
OG0001614	1	2	1	3	1	2	1	3	2	2	3	2	2	2	2	2	1.9375	0.680074	0.351006	31	28.0_32.0	0.255551	0.571429	Medium variability
OG0001615	2	1	4	2	2	2	2	2	2	1	2	2	1	2	2	2	1.9375	0.680074	0.351006	31	28.0_32.0	0.255551	0.571429	Medium variability
OG0001616	2	1	2	2	3	1	1	1	1	1	5	2	3	1	3	2	1.9375	1.12361	0.579928	31	28.0_32.0	0.255551	0.571429	High variability
OG0001617	2	3	1	2	2	2	1	1	2	2	3	2	2	2	2	2	1.9375	0.57373	0.296119	31	28.0_32.0	0.255551	0.571429	Medium variability
OG0001618	2	3	4	1	1	2	2	4	1	1	2	0	0	5	1	2	1.9375	1.43614	0.741234	31	28.0_32.0	0.255551	0.571429	High variability
OG0001619	2	1	2	2	2	1	3	1	1	3	4	1	2	1	3	2	1.9375	0.928709	0.479334	31	28.0_32.0	0.255551	0.571429	Medium variability
OG0001620	3	1	1	2	2	3	1	0	2	3	4	1	1	3	3	1	1.9375	1.12361	0.579928	31	28.0_32.0	0.255551	0.571429	High variability
OG0001621	1	2	4	2	2	1	3	3	2	2	3	2	1	1	1	1	1.9375	0.928709	0.479334	31	28.0_32.0	0.255551	0.571429	Medium variability
OG0001622	2	4	3	1	3	1	1	2	1	1	3	3	1	1	2	2	1.9375	0.997914	0.515053	31	28.0_32.0	0.255551	0.571429	Medium variability
OG0001623	2	2	2	2	2	1	2	2	1	2	4	2	2	2	2	1	1.9375	0.680074	0.351006	31	28.0_32.0	0.255551	0.571429	Medium variability
OG0001624	2	3	2	2	2	1	2	3	1	2	4	1	3	1	1	1	1.9375	0.928709	0.479334	31	28.0_32.0	0.255551	0.571429	Medium variability
OG0001625	2	2	4	4	2	1	0	2	2	1	1	1	2	2	3	2	1.9375	1.06262	0.54845	31	28.0_32.0	0.255551	0.571429	Medium variability
OG0001626	3	1	1	3	1	2	2	5	2	3	1	1	1	2	1	2	1.9375	1.12361	0.579928	31	28.0_32.0	0.255551	0.571429	High variability
OG0001627	1	2	1	1	4	2	2	2	1	1	4	1	2	2	2	3	1.9375	0.997914	0.515053	31	28.0_32.0	0.255551	0.571429	Medium variability
OG0001628	2	1	1	2	3	1	2	2	2	1	2	3	2	3	3	1	1.9375	0.771902	0.398401	31	28.0_32.0	0.255551	0.571429	Medium variability
OG0001629	2	2	2	2	1	2	2	1	2	2	3	2	2	2	2	2	1.9375	0.442531	0.228403	31	28.0_32.0	0.255551	0.571429	Low variability
OG0001630	2	2	1	1	3	2	2	2	2	1	2	3	1	2	2	3	1.9375	0.680074	0.351006	31	28.0_32.0	0.255551	0.571429	Medium variability
OG0001631	2	1	2	2	2	2	1	2	1	2	4	2	2	2	3	1	1.9375	0.771902	0.398401	31	28.0_32.0	0.255551	0.571429	Medium variability
OG0001632	1	2	3	3	2	2	1	2	2	2	2	2	0	2	3	2	1.9375	0.771902	0.398401	31	28.0_32.0	0.255551	0.571429	Medium variability
OG0001633	1	2	2	3	2	1	2	4	1	2	3	2	1	3	1	1	1.9375	0.928709	0.479334	31	28.0_32.0	0.255551	0.571429	Medium variability
OG0001634	1	2	2	2	1	2	1	2	3	3	2	2	1	3	2	2	1.9375	0.680074	0.351006	31	28.0_32.0	0.255551	0.571429	Medium variability
OG0001635	2	3	2	2	1	2	3	2	2	2	1	1	2	3	1	2	1.9375	0.680074	0.351006	31	28.0_32.0	0.255551	0.571429	Medium variability
OG0001636	2	2	2	3	2	2	2	1	2	1	3	2	2	1	2	2	1.9375	0.57373	0.296119	31	28.0_32.0	0.255551	0.571429	Medium variability
OG0001637	1	2	2	1	1	2	3	1	3	2	3	1	1	2	3	3	1.9375	0.853913	0.440729	31	28.0_32.0	0.255551	0.571429	Medium variability
OG0001638	1	2	1	2	3	3	2	1	2	2	1	2	2	2	2	3	1.9375	0.680074	0.351006	31	28.0_32.0	0.255551	0.571429	Medium variability
OG0001639	2	2	2	2	1	2	2	2	2	2	2	2	2	2	2	2	1.9375	0.25	0.129032	31	28.0_32.0	0.255551	0.571429	Low variability
OG0001640	2	2	2	2	2	1	2	2	2	2	2	2	2	2	2	2	1.9375	0.25	0.129032	31	28.0_32.0	0.255551	0.571429	Low variability
OG0001641	1	1	2	2	3	2	2	2	1	2	4	2	1	2	2	2	1.9375	0.771902	0.398401	31	28.0_32.0	0.255551	0.571429	Medium variability
OG0001642	3	2	1	2	2	2	1	2	2	2	2	2	2	2	2	2	1.9375	0.442531	0.228403	31	28.0_32.0	0.255551	0.571429	Low variability
OG0001643	2	2	1	2	2	1	2	4	0	2	3	2	2	2	2	2	1.9375	0.853913	0.440729	31	28.0_32.0	0.255551	0.571429	Medium variability
OG0001644	2	1	3	2	2	2	1	2	2	1	3	2	2	2	2	2	1.9375	0.57373	0.296119	31	28.0_32.0	0.255551	0.571429	Medium variability
OG0001645	2	2	2	2	1	2	2	2	2	2	2	2	2	2	2	2	1.9375	0.25	0.129032	31	28.0_32.0	0.255551	0.571429	Low variability
OG0001646	2	1	2	1	3	3	3	2	2	1	2	1	1	3	2	2	1.9375	0.771902	0.398401	31	28.0_32.0	0.255551	0.571429	Medium variability
OG0001647	2	2	2	1	2	3	1	3	1	2	3	3	1	2	2	1	1.9375	0.771902	0.398401	31	28.0_32.0	0.255551	0.571429	Medium variability
OG0001648	1	1	2	3	3	1	2	0	3	3	2	3	1	3	1	2	1.9375	0.997914	0.515053	31	28.0_32.0	0.255551	0.571429	Medium variability
OG0001649	2	1	2	1	4	2	1	1	2	2	4	1	3	1	2	2	1.9375	0.997914	0.515053	31	28.0_32.0	0.255551	0.571429	Medium variability
OG0001650	2	1	2	2	2	2	2	2	2	3	2	2	2	2	2	1	1.9375	0.442531	0.228403	31	28.0_32.0	0.255551	0.571429	Low variability
OG0001651	2	2	3	2	2	1	2	3	1	2	2	2	2	2	1	2	1.9375	0.57373	0.296119	31	28.0_32.0	0.255551	0.571429	Medium variability
OG0001652	2	1	2	2	4	3	2	2	2	2	2	1	1	2	2	1	1.9375	0.771902	0.398401	31	28.0_32.0	0.255551	0.571429	Medium variability
OG0001653	2	1	1	2	3	3	1	3	2	1	2	2	1	2	3	2	1.9375	0.771902	0.398401	31	28.0_32.0	0.255551	0.571429	Medium variability
OG0001654	2	2	2	2	2	2	2	1	2	2	2	2	2	2	2	2	1.9375	0.25	0.129032	31	28.0_32.0	0.255551	0.571429	Low variability
OG0001655	1	3	1	1	1	3	1	4	1	4	2	1	1	2	1	4	1.9375	1.23659	0.638242	31	28.0_32.0	0.255551	0.571429	High variability
OG0001656	1	1	2	2	3	2	2	2	3	2	2	2	2	2	2	1	1.9375	0.57373	0.296119	31	28.0_32.0	0.255551	0.571429	Medium variability
OG0001657	1	2	2	2	3	2	1	2	2	2	3	2	1	2	2	2	1.9375	0.57373	0.296119	31	28.0_32.0	0.255551	0.571429	Medium variability
OG0001658	1	0	2	3	2	2	4	0	4	2	2	3	2	1	2	1	1.9375	1.18145	0.609783	31	28.0_32.0	0.255551	0.571429	High variability
OG0001659	2	0	3	1	4	2	1	1	2	3	3	1	2	3	1	2	1.9375	1.06262	0.54845	31	28.0_32.0	0.255551	0.571429	Medium variability
OG0001660	2	2	2	2	1	2	2	1	2	2	2	2	2	2	2	3	1.9375	0.442531	0.228403	31	28.0_32.0	0.255551	0.571429	Low variability
OG0001661	2	2	3	2	1	2	3	1	2	2	1	3	2	1	3	1	1.9375	0.771902	0.398401	31	28.0_32.0	0.255551	0.571429	Medium variability
OG0001662	2	1	2	2	1	3	2	2	3	2	1	2	1	3	2	2	1.9375	0.680074	0.351006	31	28.0_32.0	0.255551	0.571429	Medium variability
OG0001663	1	1	2	3	3	3	0	2	1	3	2	2	1	3	2	2	1.9375	0.928709	0.479334	31	28.0_32.0	0.255551	0.571429	Medium variability
OG0001664	1	1	1	3	3	1	1	2	2	4	4	2	1	1	2	2	1.9375	1.06262	0.54845	31	28.0_32.0	0.255551	0.571429	Medium variability
OG0001665	1	1	1	1	2	1	4	2	1	2	4	2	2	3	2	2	1.9375	0.997914	0.515053	31	28.0_32.0	0.255551	0.571429	Medium variability
OG0001666	2	3	2	2	1	2	2	1	2	2	1	2	2	2	2	3	1.9375	0.57373	0.296119	31	28.0_32.0	0.255551	0.571429	Medium variability
OG0001667	1	1	2	1	3	2	2	2	2	2	1	2	2	2	2	4	1.9375	0.771902	0.398401	31	28.0_32.0	0.255551	0.571429	Medium variability
OG0001668	1	2	2	2	2	2	1	2	3	3	1	3	2	1	2	2	1.9375	0.680074	0.351006	31	28.0_32.0	0.255551	0.571429	Medium variability
OG0001669	1	1	2	2	3	2	1	2	2	3	3	2	1	3	2	1	1.9375	0.771902	0.398401	31	28.0_32.0	0.255551	0.571429	Medium variability
OG0001670	1	2	2	1	2	2	3	2	1	2	2	1	2	3	2	3	1.9375	0.680074	0.351006	31	28.0_32.0	0.255551	0.571429	Medium variability
OG0001671	2	2	2	2	2	2	2	1	2	2	2	2	2	2	2	2	1.9375	0.25	0.129032	31	28.0_32.0	0.255551	0.571429	Low variability
OG0001672	2	2	2	2	2	2	2	2	2	2	2	2	1	3	2	1	1.9375	0.442531	0.228403	31	28.0_32.0	0.255551	0.571429	Low variability
OG0001673	1	2	3	3	3	2	1	2	2	1	1	2	2	2	2	2	1.9375	0.680074	0.351006	31	28.0_32.0	0.255551	0.571429	Medium variability
OG0001674	1	4	3	1	2	1	1	5	2	2	1	2	1	2	2	1	1.9375	1.18145	0.609783	31	28.0_32.0	0.255551	0.571429	High variability
OG0001675	1	0	1	3	3	2	2	1	3	3	2	3	0	4	1	2	1.9375	1.18145	0.609783	31	28.0_32.0	0.255551	0.571429	High variability
OG0001676	0	3	10	2	1	3	0	1	2	1	2	1	2	3	0	0	1.9375	2.40745	1.24256	31	28.0_32.0	0.255551	0.571429	High variability
OG0001677	0	1	2	3	3	4	1	1	1	2	3	3	2	1	2	2	1.9375	1.06262	0.54845	31	28.0_32.0	0.255551	0.571429	Medium variability
OG0001678	0	2	2	2	4	2	0	3	1	3	2	3	1	2	2	2	1.9375	1.06262	0.54845	31	28.0_32.0	0.255551	0.571429	Medium variability
OG0001679	0	1	4	1	4	1	1	0	1	4	3	1	0	3	5	2	1.9375	1.65202	0.852655	31	28.0_32.0	0.255551	0.571429	High variability
OG0001680	0	0	2	0	0	0	0	26	0	3	0	0	0	0	0	0	1.9375	6.47527	3.34208	31	28.0_32.0	0.255551	0.571429	High variability
OG0001682	3	1	2	1	2	3	2	1	1	3	3	2	1	1	2	2	1.875	0.806226	0.429987	30	28.0_32.0	0.255551	0.571429	Medium variability
OG0001683	2	3	1	3	2	1	2	2	1	2	1	2	2	3	1	2	1.875	0.718795	0.383357	30	28.0_32.0	0.255551	0.571429	Medium variability
OG0001684	3	3	2	1	1	1	2	2	1	1	3	2	4	1	1	2	1.875	0.957427	0.510628	30	28.0_32.0	0.255551	0.571429	Medium variability
OG0001685	3	2	2	1	2	1	1	1	1	2	2	1	2	2	5	2	1.875	1.0247	0.546504	30	28.0_32.0	0.255551	0.571429	Medium variability
OG0001686	2	2	2	2	2	2	0	2	1	1	3	2	2	2	3	2	1.875	0.718795	0.383357	30	28.0_32.0	0.255551	0.571429	Medium variability
OG0001687	3	1	3	1	3	1	1	2	2	2	3	2	1	2	1	2	1.875	0.806226	0.429987	30	28.0_32.0	0.255551	0.571429	Medium variability
OG0001688	2	2	1	1	2	2	2	3	2	2	2	2	2	2	2	1	1.875	0.5	0.266667	30	28.0_32.0	0.255551	0.571429	Medium variability
OG0001689	3	1	0	2	2	3	2	1	2	2	3	1	2	2	1	3	1.875	0.885061	0.472033	30	28.0_32.0	0.255551	0.571429	Medium variability
OG0001690	2	2	1	1	3	2	0	2	2	2	4	3	1	2	1	2	1.875	0.957427	0.510628	30	28.0_32.0	0.255551	0.571429	Medium variability
OG0001691	2	1	3	3	2	1	1	2	3	2	2	3	2	2	1	0	1.875	0.885061	0.472033	30	28.0_32.0	0.255551	0.571429	Medium variability
OG0001692	2	2	2	2	1	2	2	2	2	2	2	2	2	2	1	2	1.875	0.341565	0.182168	30	28.0_32.0	0.255551	0.571429	Low variability
OG0001693	2	2	1	1	2	2	1	2	2	2	2	2	2	2	3	2	1.875	0.5	0.266667	30	28.0_32.0	0.255551	0.571429	Medium variability
OG0001694	2	2	2	2	2	1	3	1	2	2	2	2	1	2	1	3	1.875	0.619139	0.330208	30	28.0_32.0	0.255551	0.571429	Medium variability
OG0001695	3	2	2	1	3	2	1	1	2	1	3	2	2	1	2	2	1.875	0.718795	0.383357	30	28.0_32.0	0.255551	0.571429	Medium variability
OG0001696	2	3	2	2	2	2	1	1	2	1	2	2	2	2	2	2	1.875	0.5	0.266667	30	28.0_32.0	0.255551	0.571429	Medium variability
OG0001697	1	3	3	1	2	1	2	2	2	2	2	2	2	2	2	1	1.875	0.619139	0.330208	30	28.0_32.0	0.255551	0.571429	Medium variability
OG0001698	2	4	1	2	1	1	1	2	2	2	2	2	1	1	3	3	1.875	0.885061	0.472033	30	28.0_32.0	0.255551	0.571429	Medium variability
OG0001699	2	2	3	1	2	3	0	2	2	2	2	2	2	2	2	1	1.875	0.718795	0.383357	30	28.0_32.0	0.255551	0.571429	Medium variability
OG0001700	3	2	2	2	2	2	1	0	2	2	3	2	2	2	2	1	1.875	0.718795	0.383357	30	28.0_32.0	0.255551	0.571429	Medium variability
OG0001701	3	2	2	2	2	2	2	2	1	1	3	3	1	2	1	1	1.875	0.718795	0.383357	30	28.0_32.0	0.255551	0.571429	Medium variability
OG0001702	1	1	2	2	1	2	2	2	1	2	2	3	2	2	3	2	1.875	0.619139	0.330208	30	28.0_32.0	0.255551	0.571429	Medium variability
OG0001703	2	1	2	2	4	4	0	2	1	1	3	2	1	2	2	1	1.875	1.08781	0.580166	30	28.0_32.0	0.255551	0.571429	High variability
OG0001704	3	2	1	3	2	1	2	1	3	1	2	2	2	2	1	2	1.875	0.718795	0.383357	30	28.0_32.0	0.255551	0.571429	Medium variability
OG0001705	2	3	2	1	4	0	1	4	2	2	2	1	1	2	1	2	1.875	1.08781	0.580166	30	28.0_32.0	0.255551	0.571429	High variability
OG0001706	2	2	1	2	1	2	2	1	2	2	2	2	2	2	2	3	1.875	0.5	0.266667	30	28.0_32.0	0.255551	0.571429	Medium variability
OG0001707	6	4	1	0	1	2	1	3	1	2	1	1	1	3	1	2	1.875	1.5	0.8	30	28.0_32.0	0.255551	0.571429	High variability
OG0001708	3	2	2	1	4	2	3	3	3	0	3	0	1	1	1	1	1.875	1.20416	0.642218	30	28.0_32.0	0.255551	0.571429	High variability
OG0001709	2	3	1	2	1	2	3	2	2	2	1	2	1	2	3	1	1.875	0.718795	0.383357	30	28.0_32.0	0.255551	0.571429	Medium variability
OG0001710	3	2	2	2	1	2	2	1	2	2	2	1	4	2	2	0	1.875	0.885061	0.472033	30	28.0_32.0	0.255551	0.571429	Medium variability
OG0001711	3	1	2	1	5	2	2	1	1	1	4	2	1	1	1	2	1.875	1.20416	0.642218	30	28.0_32.0	0.255551	0.571429	High variability
OG0001712	4	4	2	2	1	2	2	1	2	1	1	2	2	1	1	2	1.875	0.957427	0.510628	30	28.0_32.0	0.255551	0.571429	Medium variability
OG0001713	2	1	2	1	2	2	3	2	1	2	1	2	2	3	2	2	1.875	0.619139	0.330208	30	28.0_32.0	0.255551	0.571429	Medium variability
OG0001714	3	2	3	1	0	1	2	2	3	4	1	2	1	1	2	2	1.875	1.0247	0.546504	30	28.0_32.0	0.255551	0.571429	Medium variability
OG0001715	3	1	2	3	1	2	2	2	2	1	3	2	2	2	1	1	1.875	0.718795	0.383357	30	28.0_32.0	0.255551	0.571429	Medium variability
OG0001716	1	2	2	2	1	2	1	1	2	3	1	3	2	2	2	3	1.875	0.718795	0.383357	30	28.0_32.0	0.255551	0.571429	Medium variability
OG0001717	2	3	2	1	4	2	1	1	2	1	3	1	1	3	1	2	1.875	0.957427	0.510628	30	28.0_32.0	0.255551	0.571429	Medium variability
OG0001718	5	4	2	0	2	0	2	0	3	3	0	1	2	0	2	4	1.875	1.62788	0.868204	30	28.0_32.0	0.255551	0.571429	High variability
OG0001719	2	0	1	2	4	2	1	1	3	3	3	2	2	1	1	2	1.875	1.0247	0.546504	30	28.0_32.0	0.255551	0.571429	Medium variability
OG0001720	3	2	3	2	2	1	3	1	2	2	1	2	2	2	1	1	1.875	0.718795	0.383357	30	28.0_32.0	0.255551	0.571429	Medium variability
OG0001721	3	2	2	2	2	2	2	2	2	1	2	2	1	2	2	1	1.875	0.5	0.266667	30	28.0_32.0	0.255551	0.571429	Medium variability
OG0001722	3	0	4	3	1	1	1	1	2	5	1	3	2	1	2	0	1.875	1.40831	0.751098	30	28.0_32.0	0.255551	0.571429	High variability
OG0001723	2	3	2	2	2	1	2	3	2	1	2	1	3	1	1	2	1.875	0.718795	0.383357	30	28.0_32.0	0.255551	0.571429	Medium variability
OG0001724	2	2	2	2	2	2	2	2	2	2	2	2	2	1	2	1	1.875	0.341565	0.182168	30	28.0_32.0	0.255551	0.571429	Low variability
OG0001725	1	3	2	2	2	1	1	2	2	1	4	2	1	2	2	2	1.875	0.806226	0.429987	30	28.0_32.0	0.255551	0.571429	Medium variability
OG0001726	2	2	2	1	2	2	1	2	2	2	2	2	2	1	2	3	1.875	0.5	0.266667	30	28.0_32.0	0.255551	0.571429	Medium variability
OG0001727	2	1	3	1	2	2	1	3	2	2	2	2	2	1	2	2	1.875	0.619139	0.330208	30	28.0_32.0	0.255551	0.571429	Medium variability
OG0001728	1	2	2	2	2	2	2	2	2	2	2	2	1	2	2	2	1.875	0.341565	0.182168	30	28.0_32.0	0.255551	0.571429	Low variability
OG0001729	2	2	2	2	2	2	2	1	2	2	1	2	2	1	3	2	1.875	0.5	0.266667	30	28.0_32.0	0.255551	0.571429	Medium variability
OG0001730	2	1	3	2	3	2	2	2	1	1	3	2	2	1	2	1	1.875	0.718795	0.383357	30	28.0_32.0	0.255551	0.571429	Medium variability
OG0001731	4	1	1	0	3	3	3	1	1	2	5	1	2	3	0	0	1.875	1.5	0.8	30	28.0_32.0	0.255551	0.571429	High variability
OG0001732	1	3	1	2	3	1	1	1	3	3	3	3	2	1	2	0	1.875	1.0247	0.546504	30	28.0_32.0	0.255551	0.571429	Medium variability
OG0001733	2	2	2	2	2	2	1	0	3	3	2	2	2	2	1	2	1.875	0.718795	0.383357	30	28.0_32.0	0.255551	0.571429	Medium variability
OG0001734	3	3	2	1	2	1	1	1	1	1	3	4	1	2	2	2	1.875	0.957427	0.510628	30	28.0_32.0	0.255551	0.571429	Medium variability
OG0001735	1	2	2	2	3	2	1	2	2	1	2	2	2	2	2	2	1.875	0.5	0.266667	30	28.0_32.0	0.255551	0.571429	Medium variability
OG0001736	2	3	2	2	1	1	2	4	2	1	1	3	1	2	1	2	1.875	0.885061	0.472033	30	28.0_32.0	0.255551	0.571429	Medium variability
OG0001737	3	2	1	1	1	2	2	1	2	2	3	2	2	2	1	3	1.875	0.718795	0.383357	30	28.0_32.0	0.255551	0.571429	Medium variability
OG0001738	2	2	2	2	1	2	2	2	1	1	2	2	2	2	3	2	1.875	0.5	0.266667	30	28.0_32.0	0.255551	0.571429	Medium variability
OG0001739	3	1	8	1	1	2	1	0	1	2	2	2	0	4	0	2	1.875	1.96214	1.04648	30	28.0_32.0	0.255551	0.571429	High variability
OG0001740	3	2	2	2	1	2	2	2	2	2	1	2	2	1	2	2	1.875	0.5	0.266667	30	28.0_32.0	0.255551	0.571429	Medium variability
OG0001741	3	1	2	2	2	2	2	1	1	2	2	2	2	2	2	2	1.875	0.5	0.266667	30	28.0_32.0	0.255551	0.571429	Medium variability
OG0001742	3	1	2	2	2	2	2	0	2	1	1	2	2	2	2	4	1.875	0.885061	0.472033	30	28.0_32.0	0.255551	0.571429	Medium variability
OG0001743	2	2	2	2	2	2	2	3	1	1	2	2	2	2	1	2	1.875	0.5	0.266667	30	28.0_32.0	0.255551	0.571429	Medium variability
OG0001744	2	2	2	4	2	2	2	2	1	1	2	2	2	1	2	1	1.875	0.718795	0.383357	30	28.0_32.0	0.255551	0.571429	Medium variability
OG0001745	2	2	2	2	1	2	2	0	2	2	3	2	2	2	2	2	1.875	0.619139	0.330208	30	28.0_32.0	0.255551	0.571429	Medium variability
OG0001746	2	1	2	3	2	1	0	2	3	3	2	2	2	2	2	1	1.875	0.806226	0.429987	30	28.0_32.0	0.255551	0.571429	Medium variability
OG0001747	5	0	2	3	1	2	2	1	1	1	1	1	3	3	2	2	1.875	1.20416	0.642218	30	28.0_32.0	0.255551	0.571429	High variability
OG0001748	2	3	2	1	3	2	1	2	2	1	3	2	1	2	1	2	1.875	0.718795	0.383357	30	28.0_32.0	0.255551	0.571429	Medium variability
OG0001749	2	2	2	2	2	2	2	2	2	1	1	2	2	2	2	2	1.875	0.341565	0.182168	30	28.0_32.0	0.255551	0.571429	Low variability
OG0001750	1	2	1	1	2	2	2	2	2	2	2	2	2	2	3	2	1.875	0.5	0.266667	30	28.0_32.0	0.255551	0.571429	Medium variability
OG0001751	1	1	2	2	4	2	1	1	2	1	2	3	2	1	3	2	1.875	0.885061	0.472033	30	28.0_32.0	0.255551	0.571429	Medium variability
OG0001752	2	2	3	1	3	3	1	2	1	2	2	2	1	2	2	1	1.875	0.718795	0.383357	30	28.0_32.0	0.255551	0.571429	Medium variability
OG0001753	1	2	2	2	2	2	2	3	1	2	2	2	3	1	2	1	1.875	0.619139	0.330208	30	28.0_32.0	0.255551	0.571429	Medium variability
OG0001754	3	0	4	2	5	1	1	2	1	2	2	2	1	2	2	0	1.875	1.31022	0.698782	30	28.0_32.0	0.255551	0.571429	High variability
OG0001755	2	2	3	1	3	2	3	2	3	1	1	1	1	2	2	1	1.875	0.806226	0.429987	30	28.0_32.0	0.255551	0.571429	Medium variability
OG0001756	2	3	2	1	2	1	1	3	2	2	3	2	1	2	2	1	1.875	0.718795	0.383357	30	28.0_32.0	0.255551	0.571429	Medium variability
OG0001757	2	2	2	1	1	2	2	2	2	2	2	2	2	2	2	2	1.875	0.341565	0.182168	30	28.0_32.0	0.255551	0.571429	Low variability
OG0001758	2	1	2	2	3	2	2	2	2	2	2	0	2	2	2	2	1.875	0.619139	0.330208	30	28.0_32.0	0.255551	0.571429	Medium variability
OG0001759	4	2	4	1	1	1	3	0	2	1	2	1	3	4	1	0	1.875	1.36015	0.725412	30	28.0_32.0	0.255551	0.571429	High variability
OG0001760	2	2	1	2	1	1	1	4	2	2	2	2	2	2	2	2	1.875	0.718795	0.383357	30	28.0_32.0	0.255551	0.571429	Medium variability
OG0001761	2	2	2	1	2	1	2	1	2	1	3	2	2	3	2	2	1.875	0.619139	0.330208	30	28.0_32.0	0.255551	0.571429	Medium variability
OG0001762	1	2	1	2	2	2	2	2	1	1	4	2	2	2	2	2	1.875	0.718795	0.383357	30	28.0_32.0	0.255551	0.571429	Medium variability
OG0001763	2	1	2	2	2	2	2	0	3	2	2	2	2	2	2	2	1.875	0.619139	0.330208	30	28.0_32.0	0.255551	0.571429	Medium variability
OG0001764	2	2	2	1	2	2	1	2	2	2	2	2	1	2	3	2	1.875	0.5	0.266667	30	28.0_32.0	0.255551	0.571429	Medium variability
OG0001765	4	2	2	2	1	2	2	0	1	1	3	2	2	3	2	1	1.875	0.957427	0.510628	30	28.0_32.0	0.255551	0.571429	Medium variability
OG0001766	1	1	1	2	2	2	0	3	2	3	2	3	2	2	2	2	1.875	0.806226	0.429987	30	28.0_32.0	0.255551	0.571429	Medium variability
OG0001767	1	1	2	2	4	2	1	1	2	2	4	1	2	1	2	2	1.875	0.957427	0.510628	30	28.0_32.0	0.255551	0.571429	Medium variability
OG0001768	2	2	1	1	2	2	2	2	2	2	2	1	3	2	2	2	1.875	0.5	0.266667	30	28.0_32.0	0.255551	0.571429	Medium variability
OG0001769	2	2	2	2	1	2	2	1	2	1	2	2	2	2	2	3	1.875	0.5	0.266667	30	28.0_32.0	0.255551	0.571429	Medium variability
OG0001770	2	2	2	2	2	2	2	2	2	2	1	2	2	2	2	1	1.875	0.341565	0.182168	30	28.0_32.0	0.255551	0.571429	Low variability
OG0001771	4	1	4	0	1	3	1	1	1	2	3	1	2	1	2	3	1.875	1.20416	0.642218	30	28.0_32.0	0.255551	0.571429	High variability
OG0001772	3	3	1	1	2	2	1	1	2	2	3	1	2	2	3	1	1.875	0.806226	0.429987	30	28.0_32.0	0.255551	0.571429	Medium variability
OG0001773	5	2	3	1	2	1	1	2	1	1	2	1	1	3	1	3	1.875	1.14746	0.611979	30	28.0_32.0	0.255551	0.571429	High variability
OG0001774	3	3	2	1	2	2	3	1	4	1	1	1	2	1	1	2	1.875	0.957427	0.510628	30	28.0_32.0	0.255551	0.571429	Medium variability
OG0001775	3	2	1	1	2	2	1	1	2	2	2	2	2	2	3	2	1.875	0.619139	0.330208	30	28.0_32.0	0.255551	0.571429	Medium variability
OG0001776	2	3	1	1	2	2	1	2	1	2	3	2	2	3	2	1	1.875	0.718795	0.383357	30	28.0_32.0	0.255551	0.571429	Medium variability
OG0001777	3	4	1	2	2	1	1	1	2	2	2	2	2	2	2	1	1.875	0.806226	0.429987	30	28.0_32.0	0.255551	0.571429	Medium variability
OG0001778	1	2	3	1	2	2	2	2	1	1	2	2	2	3	2	2	1.875	0.619139	0.330208	30	28.0_32.0	0.255551	0.571429	Medium variability
OG0001779	2	1	3	2	2	2	2	2	1	2	3	1	2	2	1	2	1.875	0.619139	0.330208	30	28.0_32.0	0.255551	0.571429	Medium variability
OG0001780	2	2	2	2	3	2	2	2	2	2	2	2	2	1	1	1	1.875	0.5	0.266667	30	28.0_32.0	0.255551	0.571429	Medium variability
OG0001781	2	2	3	1	2	2	1	2	2	1	2	2	2	2	2	2	1.875	0.5	0.266667	30	28.0_32.0	0.255551	0.571429	Medium variability
OG0001782	2	1	2	2	2	2	2	2	2	2	3	2	2	2	1	1	1.875	0.5	0.266667	30	28.0_32.0	0.255551	0.571429	Medium variability
OG0001783	2	2	1	2	2	2	2	1	2	2	2	2	3	2	2	1	1.875	0.5	0.266667	30	28.0_32.0	0.255551	0.571429	Medium variability
OG0001784	3	3	1	2	2	1	2	2	1	1	2	2	1	3	2	2	1.875	0.718795	0.383357	30	28.0_32.0	0.255551	0.571429	Medium variability
OG0001785	3	2	2	2	1	2	2	1	1	1	3	2	2	3	2	1	1.875	0.718795	0.383357	30	28.0_32.0	0.255551	0.571429	Medium variability
OG0001786	3	1	2	2	2	2	2	1	3	2	3	1	2	2	2	0	1.875	0.806226	0.429987	30	28.0_32.0	0.255551	0.571429	Medium variability
OG0001787	3	2	1	2	2	2	0	3	2	1	4	2	0	4	1	1	1.875	1.20416	0.642218	30	28.0_32.0	0.255551	0.571429	High variability
OG0001788	3	2	2	2	1	2	1	2	3	2	2	2	2	0	2	2	1.875	0.718795	0.383357	30	28.0_32.0	0.255551	0.571429	Medium variability
OG0001789	3	2	2	2	2	3	2	0	2	2	3	1	1	1	2	2	1.875	0.806226	0.429987	30	28.0_32.0	0.255551	0.571429	Medium variability
OG0001790	2	1	1	3	1	2	2	1	2	2	2	2	2	2	3	2	1.875	0.619139	0.330208	30	28.0_32.0	0.255551	0.571429	Medium variability
OG0001791	3	2	2	3	2	3	1	1	2	1	1	2	1	2	3	1	1.875	0.806226	0.429987	30	28.0_32.0	0.255551	0.571429	Medium variability
OG0001792	2	3	1	2	2	1	2	1	2	2	2	2	2	2	2	2	1.875	0.5	0.266667	30	28.0_32.0	0.255551	0.571429	Medium variability
OG0001793	4	2	1	1	2	2	2	0	3	2	2	1	2	1	2	3	1.875	0.957427	0.510628	30	28.0_32.0	0.255551	0.571429	Medium variability
OG0001794	2	2	2	2	2	2	2	1	2	2	2	2	2	2	2	1	1.875	0.341565	0.182168	30	28.0_32.0	0.255551	0.571429	Low variability
OG0001795	2	1	2	2	2	2	1	2	2	2	2	2	2	2	2	2	1.875	0.341565	0.182168	30	28.0_32.0	0.255551	0.571429	Low variability
OG0001796	1	4	3	2	2	1	0	1	4	2	2	1	1	3	0	3	1.875	1.25831	0.671096	30	28.0_32.0	0.255551	0.571429	High variability
OG0001797	2	2	1	2	2	1	1	2	2	2	3	2	2	2	2	2	1.875	0.5	0.266667	30	28.0_32.0	0.255551	0.571429	Medium variability
OG0001798	2	1	3	2	1	1	1	2	2	2	1	2	1	2	2	5	1.875	1.0247	0.546504	30	28.0_32.0	0.255551	0.571429	Medium variability
OG0001799	1	2	1	1	1	3	2	2	1	3	2	2	3	2	2	2	1.875	0.718795	0.383357	30	28.0_32.0	0.255551	0.571429	Medium variability
OG0001800	2	3	3	2	1	1	3	3	1	2	1	2	2	1	2	1	1.875	0.806226	0.429987	30	28.0_32.0	0.255551	0.571429	Medium variability
OG0001801	2	2	2	2	2	2	2	1	2	1	3	3	2	2	1	1	1.875	0.619139	0.330208	30	28.0_32.0	0.255551	0.571429	Medium variability
OG0001802	2	1	2	3	1	2	2	2	1	2	4	2	2	2	2	0	1.875	0.885061	0.472033	30	28.0_32.0	0.255551	0.571429	Medium variability
OG0001803	5	1	5	0	1	0	2	1	2	2	3	0	2	3	1	2	1.875	1.5438	0.823363	30	28.0_32.0	0.255551	0.571429	High variability
OG0001804	2	1	2	2	5	2	1	3	2	1	2	2	1	1	2	1	1.875	1.0247	0.546504	30	28.0_32.0	0.255551	0.571429	Medium variability
OG0001805	2	2	2	3	1	2	2	2	1	2	1	2	2	2	2	2	1.875	0.5	0.266667	30	28.0_32.0	0.255551	0.571429	Medium variability
OG0001806	2	1	2	2	2	2	1	2	2	1	2	2	3	2	2	2	1.875	0.5	0.266667	30	28.0_32.0	0.255551	0.571429	Medium variability
OG0001807	3	2	1	2	1	4	1	2	2	1	3	2	2	2	1	1	1.875	0.885061	0.472033	30	28.0_32.0	0.255551	0.571429	Medium variability
OG0001808	3	2	1	1	1	2	1	2	3	1	3	1	2	2	2	3	1.875	0.806226	0.429987	30	28.0_32.0	0.255551	0.571429	Medium variability
OG0001809	1	4	1	1	1	2	2	2	4	1	2	2	1	2	2	2	1.875	0.957427	0.510628	30	28.0_32.0	0.255551	0.571429	Medium variability
OG0001810	1	1	2	1	3	1	2	2	1	2	3	2	2	3	2	2	1.875	0.718795	0.383357	30	28.0_32.0	0.255551	0.571429	Medium variability
OG0001811	1	2	2	2	1	2	1	3	2	2	1	2	1	3	2	3	1.875	0.718795	0.383357	30	28.0_32.0	0.255551	0.571429	Medium variability
OG0001812	2	2	2	1	2	2	1	2	2	3	2	2	2	2	2	1	1.875	0.5	0.266667	30	28.0_32.0	0.255551	0.571429	Medium variability
OG0001813	2	2	2	2	2	1	2	1	2	2	2	2	2	2	2	2	1.875	0.341565	0.182168	30	28.0_32.0	0.255551	0.571429	Low variability
OG0001814	2	1	1	1	1	2	2	3	2	2	2	2	3	2	2	2	1.875	0.619139	0.330208	30	28.0_32.0	0.255551	0.571429	Medium variability
OG0001815	1	2	4	2	1	3	1	2	1	1	3	2	2	2	2	1	1.875	0.885061	0.472033	30	28.0_32.0	0.255551	0.571429	Medium variability
OG0001816	2	1	2	3	1	3	1	2	2	4	2	0	2	3	2	0	1.875	1.08781	0.580166	30	28.0_32.0	0.255551	0.571429	High variability
OG0001817	1	2	4	1	3	1	1	2	1	2	2	2	1	2	3	2	1.875	0.885061	0.472033	30	28.0_32.0	0.255551	0.571429	Medium variability
OG0001818	1	3	2	2	2	2	2	2	2	1	1	4	2	1	1	2	1.875	0.806226	0.429987	30	28.0_32.0	0.255551	0.571429	Medium variability
OG0001819	1	1	1	2	2	3	0	2	2	3	3	2	2	3	2	1	1.875	0.885061	0.472033	30	28.0_32.0	0.255551	0.571429	Medium variability
OG0001820	1	2	2	2	3	1	3	1	1	2	2	2	2	2	2	2	1.875	0.619139	0.330208	30	28.0_32.0	0.255551	0.571429	Medium variability
OG0001821	2	1	1	3	1	1	2	8	1	1	3	1	2	1	1	1	1.875	1.78419	0.951568	30	28.0_32.0	0.255551	0.571429	High variability
OG0001822	2	2	6	1	3	1	2	1	2	1	3	1	2	1	2	0	1.875	1.36015	0.725412	30	28.0_32.0	0.255551	0.571429	High variability
OG0001823	1	2	4	2	2	3	0	1	4	3	1	0	3	2	1	1	1.875	1.25831	0.671096	30	28.0_32.0	0.255551	0.571429	High variability
OG0001824	1	1	3	2	2	2	1	2	3	2	2	2	2	1	2	2	1.875	0.619139	0.330208	30	28.0_32.0	0.255551	0.571429	Medium variability
OG0001825	2	1	2	2	1	3	2	2	2	1	3	2	2	2	2	1	1.875	0.619139	0.330208	30	28.0_32.0	0.255551	0.571429	Medium variability
OG0001826	2	1	1	2	2	2	2	3	3	2	2	2	2	1	2	1	1.875	0.619139	0.330208	30	28.0_32.0	0.255551	0.571429	Medium variability
OG0001827	4	2	2	2	1	2	1	2	2	2	1	1	2	2	2	2	1.875	0.718795	0.383357	30	28.0_32.0	0.255551	0.571429	Medium variability
OG0001828	2	2	3	1	1	1	1	1	4	3	2	2	2	2	1	2	1.875	0.885061	0.472033	30	28.0_32.0	0.255551	0.571429	Medium variability
OG0001829	3	3	2	2	2	1	2	3	1	1	2	2	2	1	2	1	1.875	0.718795	0.383357	30	28.0_32.0	0.255551	0.571429	Medium variability
OG0001830	1	2	2	2	2	1	2	2	2	1	2	2	1	3	2	3	1.875	0.619139	0.330208	30	28.0_32.0	0.255551	0.571429	Medium variability
OG0001831	2	1	2	2	2	2	2	2	2	2	2	2	2	2	2	1	1.875	0.341565	0.182168	30	28.0_32.0	0.255551	0.571429	Low variability
OG0001832	4	2	1	2	4	2	1	1	1	2	2	1	1	2	2	2	1.875	0.957427	0.510628	30	28.0_32.0	0.255551	0.571429	Medium variability
OG0001833	2	2	1	2	2	2	2	2	2	1	2	2	2	2	2	2	1.875	0.341565	0.182168	30	28.0_32.0	0.255551	0.571429	Low variability
OG0001834	1	2	2	2	2	2	2	1	2	2	3	2	2	2	2	1	1.875	0.5	0.266667	30	28.0_32.0	0.255551	0.571429	Medium variability
OG0001835	1	1	2	2	4	2	0	1	2	2	2	2	3	2	2	2	1.875	0.885061	0.472033	30	28.0_32.0	0.255551	0.571429	Medium variability
OG0001836	1	1	2	2	2	2	2	2	1	2	3	2	2	2	2	2	1.875	0.5	0.266667	30	28.0_32.0	0.255551	0.571429	Medium variability
OG0001837	2	2	3	1	1	1	2	2	2	2	2	2	2	2	2	2	1.875	0.5	0.266667	30	28.0_32.0	0.255551	0.571429	Medium variability
OG0001838	2	2	1	2	3	2	2	2	2	2	2	1	2	1	2	2	1.875	0.5	0.266667	30	28.0_32.0	0.255551	0.571429	Medium variability
OG0001839	3	2	2	1	1	2	2	2	2	3	1	2	1	2	2	2	1.875	0.619139	0.330208	30	28.0_32.0	0.255551	0.571429	Medium variability
OG0001840	1	2	2	2	2	2	2	2	2	2	2	2	1	2	2	2	1.875	0.341565	0.182168	30	28.0_32.0	0.255551	0.571429	Low variability
OG0001841	2	1	2	2	2	2	2	2	2	1	2	2	2	2	2	2	1.875	0.341565	0.182168	30	28.0_32.0	0.255551	0.571429	Low variability
OG0001842	2	2	3	2	3	1	1	0	3	1	1	2	2	2	2	3	1.875	0.885061	0.472033	30	28.0_32.0	0.255551	0.571429	Medium variability
OG0001843	2	2	2	2	1	2	2	1	2	1	2	2	2	2	2	3	1.875	0.5	0.266667	30	28.0_32.0	0.255551	0.571429	Medium variability
OG0001844	2	2	2	2	2	2	2	1	2	1	2	2	2	2	1	3	1.875	0.5	0.266667	30	28.0_32.0	0.255551	0.571429	Medium variability
OG0001845	2	1	1	1	4	2	2	3	2	1	3	2	2	1	1	2	1.875	0.885061	0.472033	30	28.0_32.0	0.255551	0.571429	Medium variability
OG0001846	1	1	1	2	1	2	2	1	2	3	2	3	4	1	2	2	1.875	0.885061	0.472033	30	28.0_32.0	0.255551	0.571429	Medium variability
OG0001847	1	2	2	2	2	3	1	2	2	2	2	2	2	2	2	1	1.875	0.5	0.266667	30	28.0_32.0	0.255551	0.571429	Medium variability
OG0001848	2	2	2	2	2	1	1	1	2	2	4	1	2	2	2	2	1.875	0.718795	0.383357	30	28.0_32.0	0.255551	0.571429	Medium variability
OG0001849	2	1	2	2	2	2	3	2	2	1	2	2	1	2	1	3	1.875	0.619139	0.330208	30	28.0_32.0	0.255551	0.571429	Medium variability
OG0001850	2	2	2	2	1	2	2	2	2	1	2	2	3	2	2	1	1.875	0.5	0.266667	30	28.0_32.0	0.255551	0.571429	Medium variability
OG0001851	1	4	1	2	2	1	1	3	1	3	2	2	2	1	2	2	1.875	0.885061	0.472033	30	28.0_32.0	0.255551	0.571429	Medium variability
OG0001852	2	3	2	2	1	1	3	1	1	1	3	3	2	1	2	2	1.875	0.806226	0.429987	30	28.0_32.0	0.255551	0.571429	Medium variability
OG0001853	2	2	2	2	1	1	1	2	2	2	2	2	1	3	2	3	1.875	0.619139	0.330208	30	28.0_32.0	0.255551	0.571429	Medium variability
OG0001854	4	2	2	2	2	2	3	0	2	1	0	3	2	2	3	0	1.875	1.14746	0.611979	30	28.0_32.0	0.255551	0.571429	High variability
OG0001855	1	2	1	2	3	1	2	1	2	2	3	1	2	3	3	1	1.875	0.806226	0.429987	30	28.0_32.0	0.255551	0.571429	Medium variability
OG0001856	2	2	2	2	2	2	2	3	0	1	3	2	1	2	2	2	1.875	0.718795	0.383357	30	28.0_32.0	0.255551	0.571429	Medium variability
OG0001857	2	2	1	2	1	2	2	2	2	2	2	2	2	2	2	2	1.875	0.341565	0.182168	30	28.0_32.0	0.255551	0.571429	Low variability
OG0001858	2	3	3	3	2	0	2	1	1	1	1	3	1	2	2	3	1.875	0.957427	0.510628	30	28.0_32.0	0.255551	0.571429	Medium variability
OG0001859	2	1	1	1	2	2	2	2	2	2	2	3	2	3	2	1	1.875	0.619139	0.330208	30	28.0_32.0	0.255551	0.571429	Medium variability
OG0001860	2	2	1	2	3	2	2	2	2	1	3	1	3	1	1	2	1.875	0.718795	0.383357	30	28.0_32.0	0.255551	0.571429	Medium variability
OG0001861	2	1	1	2	3	1	1	1	1	3	4	2	1	2	1	4	1.875	1.08781	0.580166	30	28.0_32.0	0.255551	0.571429	High variability
OG0001862	3	2	1	2	4	1	2	2	1	2	2	2	1	2	2	1	1.875	0.806226	0.429987	30	28.0_32.0	0.255551	0.571429	Medium variability
OG0001863	2	2	2	3	3	2	1	2	2	1	2	2	1	1	2	2	1.875	0.619139	0.330208	30	28.0_32.0	0.255551	0.571429	Medium variability
OG0001864	2	2	2	2	2	2	1	2	1	2	2	2	2	2	2	2	1.875	0.341565	0.182168	30	28.0_32.0	0.255551	0.571429	Low variability
OG0001865	2	2	2	2	2	2	2	1	1	3	2	1	2	2	2	2	1.875	0.5	0.266667	30	28.0_32.0	0.255551	0.571429	Medium variability
OG0001866	1	1	3	1	2	2	1	1	2	2	3	3	2	2	2	2	1.875	0.718795	0.383357	30	28.0_32.0	0.255551	0.571429	Medium variability
OG0001867	1	2	2	2	2	2	2	2	2	2	2	2	2	1	2	2	1.875	0.341565	0.182168	30	28.0_32.0	0.255551	0.571429	Low variability
OG0001868	1	2	2	1	3	3	3	3	2	3	2	1	1	1	1	1	1.875	0.885061	0.472033	30	28.0_32.0	0.255551	0.571429	Medium variability
OG0001869	1	1	1	1	3	3	2	1	1	1	4	2	2	1	3	3	1.875	1.0247	0.546504	30	28.0_32.0	0.255551	0.571429	Medium variability
OG0001870	1	0	2	2	2	2	2	0	2	2	2	2	3	2	3	3	1.875	0.885061	0.472033	30	28.0_32.0	0.255551	0.571429	Medium variability
OG0001871	2	1	2	1	2	2	1	1	2	2	3	2	1	3	2	3	1.875	0.718795	0.383357	30	28.0_32.0	0.255551	0.571429	Medium variability
OG0001872	1	2	1	2	2	3	2	2	3	1	2	1	3	2	2	1	1.875	0.718795	0.383357	30	28.0_32.0	0.255551	0.571429	Medium variability
OG0001873	2	2	1	1	2	2	1	3	1	2	2	2	3	3	2	1	1.875	0.718795	0.383357	30	28.0_32.0	0.255551	0.571429	Medium variability
OG0001874	1	2	2	1	2	2	1	2	2	2	2	2	2	2	3	2	1.875	0.5	0.266667	30	28.0_32.0	0.255551	0.571429	Medium variability
OG0001875	2	1	3	2	5	1	1	1	1	2	2	2	2	1	3	1	1.875	1.08781	0.580166	30	28.0_32.0	0.255551	0.571429	High variability
OG0001876	2	2	2	2	2	1	0	2	1	2	2	2	2	2	3	3	1.875	0.718795	0.383357	30	28.0_32.0	0.255551	0.571429	Medium variability
OG0001877	1	3	1	3	2	2	1	2	2	2	2	2	2	0	2	3	1.875	0.806226	0.429987	30	28.0_32.0	0.255551	0.571429	Medium variability
OG0001878	1	1	3	1	3	2	1	4	2	3	2	1	0	4	1	1	1.875	1.20416	0.642218	30	28.0_32.0	0.255551	0.571429	High variability
OG0001879	1	1	2	2	2	2	2	2	2	3	2	1	2	2	2	2	1.875	0.5	0.266667	30	28.0_32.0	0.255551	0.571429	Medium variability
OG0001880	1	3	2	2	2	3	1	2	2	2	1	1	1	2	3	2	1.875	0.718795	0.383357	30	28.0_32.0	0.255551	0.571429	Medium variability
OG0001881	1	2	3	2	1	2	3	1	2	2	2	2	2	2	1	2	1.875	0.619139	0.330208	30	28.0_32.0	0.255551	0.571429	Medium variability
OG0001882	1	2	2	2	2	2	2	2	2	1	3	2	1	2	2	2	1.875	0.5	0.266667	30	28.0_32.0	0.255551	0.571429	Medium variability
OG0001883	1	1	3	2	2	1	1	0	3	3	1	1	5	1	4	1	1.875	1.36015	0.725412	30	28.0_32.0	0.255551	0.571429	High variability
OG0001884	1	1	2	2	3	1	2	3	1	1	3	2	2	2	2	2	1.875	0.718795	0.383357	30	28.0_32.0	0.255551	0.571429	Medium variability
OG0001885	2	4	1	3	2	1	1	2	5	1	4	1	0	1	1	1	1.875	1.40831	0.751098	30	28.0_32.0	0.255551	0.571429	High variability
OG0001886	1	5	3	1	1	1	1	3	2	2	0	4	0	2	1	3	1.875	1.40831	0.751098	30	28.0_32.0	0.255551	0.571429	High variability
OG0001887	1	1	1	2	3	2	3	2	3	1	2	2	2	2	2	1	1.875	0.718795	0.383357	30	28.0_32.0	0.255551	0.571429	Medium variability
OG0001888	1	3	1	1	3	1	2	2	2	3	3	1	1	2	2	2	1.875	0.806226	0.429987	30	28.0_32.0	0.255551	0.571429	Medium variability
OG0001889	1	2	2	1	1	3	2	1	1	3	1	3	3	2	2	2	1.875	0.806226	0.429987	30	28.0_32.0	0.255551	0.571429	Medium variability
OG0001890	1	2	2	2	1	2	2	2	2	2	2	2	2	2	2	2	1.875	0.341565	0.182168	30	28.0_32.0	0.255551	0.571429	Low variability
OG0001891	1	2	2	1	2	2	2	3	2	1	2	2	2	2	3	1	1.875	0.619139	0.330208	30	28.0_32.0	0.255551	0.571429	Medium variability
OG0001892	1	0	3	2	1	1	1	1	3	4	1	3	1	5	2	1	1.875	1.36015	0.725412	30	28.0_32.0	0.255551	0.571429	High variability
OG0001893	1	3	1	2	1	2	2	2	3	2	3	1	2	1	1	3	1.875	0.806226	0.429987	30	28.0_32.0	0.255551	0.571429	Medium variability
OG0001894	2	2	2	2	2	2	1	2	2	2	1	2	2	2	2	2	1.875	0.341565	0.182168	30	28.0_32.0	0.255551	0.571429	Low variability
OG0001895	1	1	2	2	2	2	2	2	2	2	2	2	2	2	2	2	1.875	0.341565	0.182168	30	28.0_32.0	0.255551	0.571429	Low variability
OG0001896	1	3	3	0	3	3	2	1	1	4	1	3	0	3	0	2	1.875	1.31022	0.698782	30	28.0_32.0	0.255551	0.571429	High variability
OG0001897	1	1	1	2	3	1	1	4	3	1	3	2	1	3	2	1	1.875	1.0247	0.546504	30	28.0_32.0	0.255551	0.571429	Medium variability
OG0001898	1	1	1	1	4	1	1	2	1	1	4	2	3	2	2	3	1.875	1.08781	0.580166	30	28.0_32.0	0.255551	0.571429	High variability
OG0001899	1	2	2	2	2	2	2	1	2	2	2	2	2	2	2	2	1.875	0.341565	0.182168	30	28.0_32.0	0.255551	0.571429	Low variability
OG0001900	0	1	1	1	3	1	2	0	1	4	3	4	0	4	3	2	1.875	1.45488	0.775934	30	28.0_32.0	0.255551	0.571429	High variability
OG0001901	3	2	1	2	4	1	2	1	2	1	2	1	2	1	2	2	1.8125	0.834166	0.46023	29	28.0_32.0	0.255551	0.571429	Medium variability
OG0001902	2	2	2	2	2	1	2	1	2	2	2	2	2	2	1	2	1.8125	0.403113	0.222407	29	28.0_32.0	0.255551	0.571429	Low variability
OG0001903	4	4	1	1	1	1	1	3	1	2	1	1	1	1	1	5	1.8125	1.37689	0.759665	29	28.0_32.0	0.255551	0.571429	High variability
OG0001904	2	2	2	3	2	1	2	2	2	2	2	1	2	1	2	1	1.8125	0.543906	0.300086	29	28.0_32.0	0.255551	0.571429	Medium variability
OG0001905	3	2	1	2	3	2	1	1	3	1	3	1	1	1	2	2	1.8125	0.834166	0.46023	29	28.0_32.0	0.255551	0.571429	Medium variability
OG0001906	2	2	1	1	2	2	2	4	1	1	3	2	2	1	1	2	1.8125	0.834166	0.46023	29	28.0_32.0	0.255551	0.571429	Medium variability
OG0001907	3	2	1	1	2	1	1	2	1	1	3	2	2	2	2	3	1.8125	0.75	0.413793	29	28.0_32.0	0.255551	0.571429	Medium variability
OG0001908	3	3	1	1	3	5	1	2	1	0	1	1	0	1	1	5	1.8125	1.55858	0.859905	29	28.0_32.0	0.255551	0.571429	High variability
OG0001909	2	2	3	1	1	1	2	1	2	2	2	2	2	2	2	2	1.8125	0.543906	0.300086	29	28.0_32.0	0.255551	0.571429	Medium variability
OG0001910	3	1	2	2	2	2	1	2	2	2	3	2	1	2	1	1	1.8125	0.655108	0.361439	29	28.0_32.0	0.255551	0.571429	Medium variability
OG0001911	1	1	2	2	2	2	2	2	2	2	2	2	2	2	2	1	1.8125	0.403113	0.222407	29	28.0_32.0	0.255551	0.571429	Low variability
OG0001912	2	1	3	1	2	1	1	1	1	2	3	2	2	3	2	2	1.8125	0.75	0.413793	29	28.0_32.0	0.255551	0.571429	Medium variability
OG0001913	2	2	2	2	2	2	2	2	2	1	3	2	1	2	1	1	1.8125	0.543906	0.300086	29	28.0_32.0	0.255551	0.571429	Medium variability
OG0001914	2	1	1	2	2	2	1	2	3	1	3	3	2	2	1	1	1.8125	0.75	0.413793	29	28.0_32.0	0.255551	0.571429	Medium variability
OG0001915	3	1	1	1	3	3	1	2	1	2	3	2	1	2	1	2	1.8125	0.834166	0.46023	29	28.0_32.0	0.255551	0.571429	Medium variability
OG0001916	3	1	5	1	2	1	3	3	2	2	1	0	0	3	0	2	1.8125	1.37689	0.759665	29	28.0_32.0	0.255551	0.571429	High variability
OG0001917	2	2	2	2	2	1	2	1	2	2	1	2	2	2	2	2	1.8125	0.403113	0.222407	29	28.0_32.0	0.255551	0.571429	Low variability
OG0001918	3	1	1	1	3	1	1	1	3	2	2	1	3	1	1	4	1.8125	1.04682	0.577556	29	28.0_32.0	0.255551	0.571429	High variability
OG0001919	2	3	2	1	2	2	2	2	1	1	2	2	2	1	2	2	1.8125	0.543906	0.300086	29	28.0_32.0	0.255551	0.571429	Medium variability
OG0001920	2	2	1	2	2	2	3	2	1	2	4	1	1	2	2	0	1.8125	0.910586	0.502392	29	28.0_32.0	0.255551	0.571429	Medium variability
OG0001921	2	2	2	2	2	1	2	2	2	1	2	2	2	2	2	1	1.8125	0.403113	0.222407	29	28.0_32.0	0.255551	0.571429	Low variability
OG0001922	2	2	1	2	2	2	2	1	1	2	2	2	2	2	2	2	1.8125	0.403113	0.222407	29	28.0_32.0	0.255551	0.571429	Low variability
OG0001923	2	2	2	2	2	2	2	1	2	2	1	2	2	1	2	2	1.8125	0.403113	0.222407	29	28.0_32.0	0.255551	0.571429	Low variability
OG0001924	2	2	1	2	2	2	1	1	1	2	4	2	2	1	2	2	1.8125	0.75	0.413793	29	28.0_32.0	0.255551	0.571429	Medium variability
OG0001925	4	2	1	1	1	1	2	2	1	3	2	2	2	2	2	1	1.8125	0.834166	0.46023	29	28.0_32.0	0.255551	0.571429	Medium variability
OG0001926	2	2	2	1	2	2	2	1	2	1	2	2	2	2	2	2	1.8125	0.403113	0.222407	29	28.0_32.0	0.255551	0.571429	Low variability
OG0001927	3	2	1	2	3	2	1	1	1	2	1	2	2	2	2	2	1.8125	0.655108	0.361439	29	28.0_32.0	0.255551	0.571429	Medium variability
OG0001928	3	1	2	3	2	1	1	0	2	1	4	1	1	2	3	2	1.8125	1.04682	0.577556	29	28.0_32.0	0.255551	0.571429	High variability
OG0001929	3	3	1	1	4	1	1	1	1	1	1	1	1	1	1	7	1.8125	1.68201	0.928007	29	28.0_32.0	0.255551	0.571429	High variability
OG0001930	2	1	1	3	3	1	2	3	2	2	2	2	1	1	2	1	1.8125	0.75	0.413793	29	28.0_32.0	0.255551	0.571429	Medium variability
OG0001931	3	2	1	2	1	2	2	1	2	2	1	2	2	2	2	2	1.8125	0.543906	0.300086	29	28.0_32.0	0.255551	0.571429	Medium variability
OG0001932	2	1	2	1	1	4	2	1	2	1	1	4	2	1	2	2	1.8125	0.981071	0.54128	29	28.0_32.0	0.255551	0.571429	Medium variability
OG0001933	2	1	2	2	3	2	3	1	2	2	2	1	2	1	2	1	1.8125	0.655108	0.361439	29	28.0_32.0	0.255551	0.571429	Medium variability
OG0001934	2	2	1	1	2	2	1	3	2	2	2	1	2	2	2	2	1.8125	0.543906	0.300086	29	28.0_32.0	0.255551	0.571429	Medium variability
OG0001935	2	2	1	2	2	2	3	1	1	3	2	1	1	2	2	2	1.8125	0.655108	0.361439	29	28.0_32.0	0.255551	0.571429	Medium variability
OG0001936	3	0	2	2	2	1	1	0	4	3	2	2	2	3	2	0	1.8125	1.16726	0.644006	29	28.0_32.0	0.255551	0.571429	High variability
OG0001937	2	2	2	2	2	2	1	1	2	2	2	2	2	2	2	1	1.8125	0.403113	0.222407	29	28.0_32.0	0.255551	0.571429	Low variability
OG0001938	3	1	1	2	4	1	1	2	1	1	5	1	1	2	1	2	1.8125	1.22304	0.674782	29	28.0_32.0	0.255551	0.571429	High variability
OG0001939	2	1	4	2	2	0	1	1	3	2	3	0	1	3	2	2	1.8125	1.10868	0.611684	29	28.0_32.0	0.255551	0.571429	High variability
OG0001940	3	2	2	2	3	1	3	1	0	0	2	3	2	2	1	2	1.8125	0.981071	0.54128	29	28.0_32.0	0.255551	0.571429	Medium variability
OG0001941	3	2	2	1	2	2	1	2	1	1	3	2	1	2	2	2	1.8125	0.655108	0.361439	29	28.0_32.0	0.255551	0.571429	Medium variability
OG0001942	1	5	1	1	3	1	1	3	1	1	2	1	1	5	1	1	1.8125	1.42449	0.785925	29	28.0_32.0	0.255551	0.571429	High variability
OG0001943	1	2	3	2	2	2	1	1	2	1	2	2	1	2	2	3	1.8125	0.655108	0.361439	29	28.0_32.0	0.255551	0.571429	Medium variability
OG0001944	3	2	1	2	2	2	1	1	1	1	3	2	1	2	2	3	1.8125	0.75	0.413793	29	28.0_32.0	0.255551	0.571429	Medium variability
OG0001945	4	1	1	4	1	2	1	1	1	1	3	1	0	2	4	2	1.8125	1.27639	0.704214	29	28.0_32.0	0.255551	0.571429	High variability
OG0001946	3	0	2	2	2	2	1	2	1	1	3	2	2	2	1	3	1.8125	0.834166	0.46023	29	28.0_32.0	0.255551	0.571429	Medium variability
OG0001947	5	3	2	2	2	1	1	2	1	1	2	2	1	1	1	2	1.8125	1.04682	0.577556	29	28.0_32.0	0.255551	0.571429	High variability
OG0001948	2	2	1	2	2	1	1	1	2	2	2	3	1	3	2	2	1.8125	0.655108	0.361439	29	28.0_32.0	0.255551	0.571429	Medium variability
OG0001949	1	2	1	2	4	3	2	1	1	3	2	1	1	2	1	2	1.8125	0.910586	0.502392	29	28.0_32.0	0.255551	0.571429	Medium variability
OG0001950	2	1	1	2	3	2	2	2	1	1	4	2	2	1	2	1	1.8125	0.834166	0.46023	29	28.0_32.0	0.255551	0.571429	Medium variability
OG0001951	1	1	2	2	2	2	1	2	2	2	3	2	2	1	2	2	1.8125	0.543906	0.300086	29	28.0_32.0	0.255551	0.571429	Medium variability
OG0001952	3	1	2	1	1	2	2	1	2	2	1	2	2	3	2	2	1.8125	0.655108	0.361439	29	28.0_32.0	0.255551	0.571429	Medium variability
OG0001953	2	1	2	2	2	2	2	1	2	2	1	2	2	2	2	2	1.8125	0.403113	0.222407	29	28.0_32.0	0.255551	0.571429	Low variability
OG0001954	3	1	1	1	1	2	1	3	2	1	3	3	2	1	2	2	1.8125	0.834166	0.46023	29	28.0_32.0	0.255551	0.571429	Medium variability
OG0001955	2	2	1	2	1	2	2	2	2	2	2	2	2	2	1	2	1.8125	0.403113	0.222407	29	28.0_32.0	0.255551	0.571429	Low variability
OG0001956	3	1	2	2	2	1	2	2	1	1	3	2	2	2	2	1	1.8125	0.655108	0.361439	29	28.0_32.0	0.255551	0.571429	Medium variability
OG0001957	2	2	1	2	2	1	2	2	1	1	3	3	3	1	1	2	1.8125	0.75	0.413793	29	28.0_32.0	0.255551	0.571429	Medium variability
OG0001958	3	0	3	0	2	1	2	1	4	1	5	2	2	1	1	1	1.8125	1.37689	0.759665	29	28.0_32.0	0.255551	0.571429	High variability
OG0001959	2	2	2	2	3	2	1	2	3	1	2	1	1	2	1	2	1.8125	0.655108	0.361439	29	28.0_32.0	0.255551	0.571429	Medium variability
OG0001960	3	2	3	1	2	1	2	1	2	2	1	2	2	2	3	0	1.8125	0.834166	0.46023	29	28.0_32.0	0.255551	0.571429	Medium variability
OG0001961	2	1	0	1	5	1	1	1	2	1	4	3	2	4	0	1	1.8125	1.47054	0.811335	29	28.0_32.0	0.255551	0.571429	High variability
OG0001962	2	1	1	2	2	2	2	2	2	1	2	2	2	2	2	2	1.8125	0.403113	0.222407	29	28.0_32.0	0.255551	0.571429	Low variability
OG0001963	2	3	2	4	2	1	2	2	1	2	2	1	1	1	2	1	1.8125	0.834166	0.46023	29	28.0_32.0	0.255551	0.571429	Medium variability
OG0001964	2	2	1	1	3	1	1	1	2	2	2	3	2	2	2	2	1.8125	0.655108	0.361439	29	28.0_32.0	0.255551	0.571429	Medium variability
OG0001965	2	2	1	2	4	1	1	1	3	1	2	2	2	2	2	1	1.8125	0.834166	0.46023	29	28.0_32.0	0.255551	0.571429	Medium variability
OG0001966	3	2	2	2	2	1	1	1	2	2	2	2	2	1	2	2	1.8125	0.543906	0.300086	29	28.0_32.0	0.255551	0.571429	Medium variability
OG0001967	3	2	1	1	3	2	2	1	2	1	1	2	2	2	2	2	1.8125	0.655108	0.361439	29	28.0_32.0	0.255551	0.571429	Medium variability
OG0001968	3	2	2	1	3	1	1	2	3	1	2	1	1	1	2	3	1.8125	0.834166	0.46023	29	28.0_32.0	0.255551	0.571429	Medium variability
OG0001969	2	4	2	1	3	1	2	1	2	2	2	3	1	1	2	0	1.8125	0.981071	0.54128	29	28.0_32.0	0.255551	0.571429	Medium variability
OG0001970	3	2	1	2	3	1	1	3	1	1	2	2	2	2	1	2	1.8125	0.75	0.413793	29	28.0_32.0	0.255551	0.571429	Medium variability
OG0001971	1	3	2	2	2	1	2	2	2	2	2	2	2	1	1	2	1.8125	0.543906	0.300086	29	28.0_32.0	0.255551	0.571429	Medium variability
OG0001972	3	1	0	4	3	2	2	1	2	1	1	2	1	2	3	1	1.8125	1.04682	0.577556	29	28.0_32.0	0.255551	0.571429	High variability
OG0001973	1	2	1	1	1	2	2	2	1	2	2	2	4	2	2	2	1.8125	0.75	0.413793	29	28.0_32.0	0.255551	0.571429	Medium variability
OG0001974	5	2	1	1	1	1	1	4	2	1	1	2	1	1	1	4	1.8125	1.32759	0.732464	29	28.0_32.0	0.255551	0.571429	High variability
OG0001975	2	1	2	2	2	2	1	2	2	1	2	2	2	2	2	2	1.8125	0.403113	0.222407	29	28.0_32.0	0.255551	0.571429	Low variability
OG0001976	2	3	2	1	3	2	2	1	2	2	1	1	2	2	1	2	1.8125	0.655108	0.361439	29	28.0_32.0	0.255551	0.571429	Medium variability
OG0001977	2	1	2	2	2	2	2	2	1	2	2	2	2	3	1	1	1.8125	0.543906	0.300086	29	28.0_32.0	0.255551	0.571429	Medium variability
OG0001978	1	2	3	2	3	1	1	2	1	3	1	2	2	1	3	1	1.8125	0.834166	0.46023	29	28.0_32.0	0.255551	0.571429	Medium variability
OG0001979	2	1	2	2	2	2	1	1	2	2	2	2	2	2	2	2	1.8125	0.403113	0.222407	29	28.0_32.0	0.255551	0.571429	Low variability
OG0001980	4	1	1	2	1	1	2	3	2	3	2	1	2	1	2	1	1.8125	0.910586	0.502392	29	28.0_32.0	0.255551	0.571429	Medium variability
OG0001981	4	3	3	1	1	2	2	1	1	1	0	2	1	1	1	5	1.8125	1.32759	0.732464	29	28.0_32.0	0.255551	0.571429	High variability
OG0001982	3	2	2	2	1	2	2	2	2	2	2	1	1	2	2	1	1.8125	0.543906	0.300086	29	28.0_32.0	0.255551	0.571429	Medium variability
OG0001983	1	1	2	2	2	2	2	1	2	2	2	2	2	2	2	2	1.8125	0.403113	0.222407	29	28.0_32.0	0.255551	0.571429	Low variability
OG0001984	1	1	2	3	2	2	2	1	2	3	2	1	2	2	1	2	1.8125	0.655108	0.361439	29	28.0_32.0	0.255551	0.571429	Medium variability
OG0001985	2	1	2	2	3	2	1	2	2	2	1	2	2	2	1	2	1.8125	0.543906	0.300086	29	28.0_32.0	0.255551	0.571429	Medium variability
OG0001986	1	1	0	0	2	1	0	1	4	1	2	1	1	9	4	1	1.8125	2.2574	1.24546	29	28.0_32.0	0.255551	0.571429	High variability
OG0001987	2	2	2	2	1	2	3	2	1	1	2	2	2	2	2	1	1.8125	0.543906	0.300086	29	28.0_32.0	0.255551	0.571429	Medium variability
OG0001988	1	1	2	2	2	2	2	2	2	2	2	2	2	2	2	1	1.8125	0.403113	0.222407	29	28.0_32.0	0.255551	0.571429	Low variability
OG0001989	1	2	3	1	2	1	1	1	1	4	2	3	1	2	2	2	1.8125	0.910586	0.502392	29	28.0_32.0	0.255551	0.571429	Medium variability
OG0001990	2	2	2	2	2	2	2	0	2	2	2	2	1	2	2	2	1.8125	0.543906	0.300086	29	28.0_32.0	0.255551	0.571429	Medium variability
OG0001991	2	2	2	1	2	3	1	2	1	2	3	1	1	3	1	2	1.8125	0.75	0.413793	29	28.0_32.0	0.255551	0.571429	Medium variability
OG0001992	2	2	1	2	2	2	2	1	2	2	2	2	2	1	2	2	1.8125	0.403113	0.222407	29	28.0_32.0	0.255551	0.571429	Low variability
OG0001993	1	1	2	2	2	1	2	2	2	2	3	2	2	2	2	1	1.8125	0.543906	0.300086	29	28.0_32.0	0.255551	0.571429	Medium variability
OG0001994	2	1	2	2	2	2	2	1	2	2	2	1	2	2	2	2	1.8125	0.403113	0.222407	29	28.0_32.0	0.255551	0.571429	Low variability
OG0001995	2	2	3	2	3	2	1	1	1	1	2	1	2	2	2	2	1.8125	0.655108	0.361439	29	28.0_32.0	0.255551	0.571429	Medium variability
OG0001996	2	3	2	2	2	2	1	1	2	1	1	3	2	2	2	1	1.8125	0.655108	0.361439	29	28.0_32.0	0.255551	0.571429	Medium variability
OG0001997	2	1	1	1	3	1	2	2	2	2	3	2	1	2	2	2	1.8125	0.655108	0.361439	29	28.0_32.0	0.255551	0.571429	Medium variability
OG0001998	3	2	1	2	2	2	1	3	2	1	3	2	2	1	1	1	1.8125	0.75	0.413793	29	28.0_32.0	0.255551	0.571429	Medium variability
OG0001999	1	1	2	3	1	1	3	2	4	2	2	1	1	2	2	1	1.8125	0.910586	0.502392	29	28.0_32.0	0.255551	0.571429	Medium variability
OG0002000	3	2	3	2	2	2	1	0	2	1	1	1	2	2	3	2	1.8125	0.834166	0.46023	29	28.0_32.0	0.255551	0.571429	Medium variability
OG0002001	2	1	2	2	2	2	1	3	1	1	4	1	2	3	1	1	1.8125	0.910586	0.502392	29	28.0_32.0	0.255551	0.571429	Medium variability
OG0002002	2	2	1	2	3	1	1	2	2	2	2	2	1	2	2	2	1.8125	0.543906	0.300086	29	28.0_32.0	0.255551	0.571429	Medium variability
OG0002003	2	2	2	2	2	2	2	2	1	2	2	2	1	2	2	1	1.8125	0.403113	0.222407	29	28.0_32.0	0.255551	0.571429	Low variability
OG0002004	2	1	2	2	2	2	0	2	2	2	2	2	2	1	2	3	1.8125	0.655108	0.361439	29	28.0_32.0	0.255551	0.571429	Medium variability
OG0002005	2	1	2	1	3	2	3	1	1	1	3	1	1	3	2	2	1.8125	0.834166	0.46023	29	28.0_32.0	0.255551	0.571429	Medium variability
OG0002006	2	1	1	1	2	2	3	3	2	2	2	1	2	2	2	1	1.8125	0.655108	0.361439	29	28.0_32.0	0.255551	0.571429	Medium variability
OG0002007	3	2	1	1	3	1	2	1	1	1	2	3	1	2	3	2	1.8125	0.834166	0.46023	29	28.0_32.0	0.255551	0.571429	Medium variability
OG0002008	2	2	1	2	1	2	1	2	2	2	3	2	2	1	2	2	1.8125	0.543906	0.300086	29	28.0_32.0	0.255551	0.571429	Medium variability
OG0002009	2	1	2	2	2	2	2	2	2	1	2	2	2	2	2	1	1.8125	0.403113	0.222407	29	28.0_32.0	0.255551	0.571429	Low variability
OG0002010	1	2	3	2	1	1	2	2	2	3	1	3	1	2	2	1	1.8125	0.75	0.413793	29	28.0_32.0	0.255551	0.571429	Medium variability
OG0002011	2	1	3	1	3	1	1	3	1	3	3	1	1	1	1	3	1.8125	0.981071	0.54128	29	28.0_32.0	0.255551	0.571429	Medium variability
OG0002012	2	2	1	1	2	2	2	2	1	2	1	2	2	2	2	3	1.8125	0.543906	0.300086	29	28.0_32.0	0.255551	0.571429	Medium variability
OG0002013	4	1	2	0	3	2	0	4	1	2	4	0	1	3	1	1	1.8125	1.42449	0.785925	29	28.0_32.0	0.255551	0.571429	High variability
OG0002014	3	0	1	3	3	1	2	1	2	4	3	1	2	1	2	0	1.8125	1.16726	0.644006	29	28.0_32.0	0.255551	0.571429	High variability
OG0002015	2	1	3	1	2	2	2	1	1	2	2	2	2	2	2	2	1.8125	0.543906	0.300086	29	28.0_32.0	0.255551	0.571429	Medium variability
OG0002016	3	2	5	2	2	1	1	1	1	1	4	1	1	2	1	1	1.8125	1.22304	0.674782	29	28.0_32.0	0.255551	0.571429	High variability
[truncated: 24,379 more rows]

[truncated: 4 more sheets: Table S11, Table S12, Table S13, Table S14]
